# Supplementary material
Source: MDPI journal article supplement (https://www.mdpi.com/2073-4344/11/9/1103)
Supplement: s1 [file s1]

# **Evaluation of 3,3'-Triazolyl Biisoquinoline N,N'-dioxide Catalysts for Asymmetric Transfer Hydrogenation of Hydrazones with Trichlorosilane**

Shiyu Sun<sup>1</sup>, Changgong Xu<sup>1</sup>, Jamielyn Jarvis<sup>1</sup>, Phillip Nader<sup>1</sup>, Brandon Naumann<sup>1</sup>,  
Abigail Soliven<sup>2</sup>, Roberto Peverati<sup>1,\*</sup> and Norito Takenaka<sup>1,\*</sup>

<sup>1</sup>Chemistry Program, Department of Biomedical and Chemical Engineering and  
Sciences,  
Florida Institute of Technology, 150 West University Boulevard,  
Melbourne, Florida 32901-6975, United States  
[rpeverati@fit.edu](mailto:rpeverati@fit.edu), [ntakenaka@fit.edu](mailto:ntakenaka@fit.edu)

<sup>2</sup>Department of Chemistry, Purdue University, West Lafayette, Indiana 47907, United  
States

## **Supporting Information**

### **Table of Contents**

|                                                         |     |
|---------------------------------------------------------|-----|
| 1. General Information                                  | S2  |
| 2. Experimental Procedures                              | S3  |
| 3. Computational Procedures                             | S18 |
| 4. Reference                                            | S19 |
| 5. <sup>1</sup> H, <sup>13</sup> C NMR and HPLC Spectra | S21 |

## 1. General Information.

All reactions were carried out in oven- or flame-dried glassware under an atmosphere of dry argon or nitrogen unless otherwise noted. Except as otherwise indicated, all reactions were magnetically stirred and monitored by analytical thin-layer chromatography using SiliCycle® Inc. and EMD Millipore pre-coated silica gel plates with F<sub>254</sub> indicator. Visualization was accomplished by UV light (254 nm) with combination of potassium permanganate. Flash column chromatography was performed according to the method of Still <sup>[1]</sup> using silica gel 60 (mesh 230-400) supplied by SiliCycle® Inc. Yields refer to chromatographically and spectroscopically pure compounds, unless otherwise stated.

Commercial grade reagents and solvents were purchased from Sigma-Aldrich, Alfa-Aesar, Acros, Fisher, TCI, and VWR, and were used as received without further purification except as indicated below. Trichlorosilane was distilled over calcium hydride under an atmosphere of dry nitrogen prior to use. Dichloromethane, chloroform, and acetonitrile were freshly distilled over calcium hydride under an atmosphere of dry nitrogen prior to use. Tetrahydrofuran was freshly distilled over sodium and benzophenone under an atmosphere of dry nitrogen prior to use.

All racemic hydrazine samples were prepared by sodium cyanoborohydride reduction of corresponding hydrazones.

All <sup>1</sup>H NMR and <sup>13</sup>C NMR spectra were obtained using a Bruker 400 Ultrashield or an Oxford AS400 Spectrometer (<sup>1</sup>H 400 MHz, <sup>13</sup>C 100 MHz) at ambient temperature in CDCl<sub>3</sub> purchased from Cambridge Isotope Laboratories, Inc. Chemical shifts in <sup>1</sup>H NMR spectra are reported in parts per million (ppm) respective to tetramethylsilane (δ

0.00 ppm) unless otherwise noted. The proton spectra are reported as follows  $\delta$  (multiplicity, coupling constant  $J$ , number of protons). Multiplicities are indicated by s (singlet), d (doublet), t (triplet), q (quartet), m (multiplet), and br (broad). Chemical shifts in  $^{13}\text{C}$  NMR spectra are reported in ppm relative to  $\text{CDCl}_3$  ( $\delta$  77.0 ppm). All  $^{13}\text{C}$  NMR spectra were recorded with complete proton decoupling. Infrared (IR) spectra were recorded using a Nicolet iS5 FT-IR instrument. MS data were obtained using an Agilent 6100 Quadrupole LC/MS. HRMS data were obtained at USF Mass Spec and Peptide Core Facility in Department of Chemistry at University of South Florida. Optical rotations were measured using a Jasco P2000 Polarimeter at 589 nm and were reported as  $[\alpha]_{\text{D}}^{25}$ , where C is reported in g/mL.

## **2. Experimental Procedures.**

### **Preparation of Hydrazones.**

All hydrazones were prepared accordingly to the reported procedure. <sup>[2]</sup>

### **Preparation of Catalysts.**

Catalysts **2a-d** were prepared accordingly to our published procedure. <sup>[3]</sup>

Catalysts **2e,f** were prepared accordingly to our published procedure. <sup>[4]</sup>

### **Catalytic Asymmetric Transfer Hydrogenation with Trichlorosilane.**

#### **Representative Procedure:**

**(*R*)-*N*-(1-Phenylethyl)benzohydrazide (3a):**

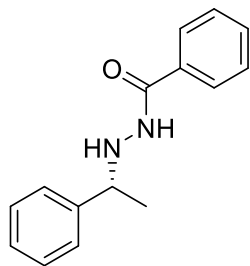

A flame-dried test tube with a magnetic stir bar was charged with hydrazone **1a** (60 mg, 0.25 mmol), catalyst **2a** (15 mg, 0.025 mmol) and CH<sub>2</sub>Cl<sub>2</sub> (1.0 mL), cooled to –50 °C, and then treated slowly with a solution of HSiCl<sub>3</sub> in CH<sub>2</sub>Cl<sub>2</sub> (250 μL, 1.5 M). The reaction mixture was stirred at –40 °C for 20 hours, and then quenched by pouring it into 30 mL of saturated aqueous NaHCO<sub>3</sub> solution cooled to 0 °C. The resulting mixture was vigorously stirred for 30 min at room temperature and extracted twice with 15 mL of CH<sub>2</sub>Cl<sub>2</sub>. The combined organic layers were dried over Na<sub>2</sub>SO<sub>4</sub>, filtered, and condensed *in vacuo*. A <sup>1</sup>H NMR spectrum of the crude reaction mixture was taken with 1,1,2,2-tetrachloroethane as an internal standard (48% NMR yield). A fraction of the crude mixture was purified by prep TLC using 20% EtOAc in CH<sub>2</sub>Cl<sub>2</sub> as an eluent for characterization purposes.

All spectral data were consistent with the literature values.<sup>[2]</sup>

<sup>1</sup>H NMR (400 MHz, CDCl<sub>3</sub>) δ 7.63-7.60 (m, 2H), 7.50-7.46 (m, 1H), 7.42-7.34 (m, 7H), 7.32-7.27 (m, 1H), 5.10 (br d, *J* = 4.8 Hz, 1H), 4.26 (q, *J* = 6.8 Hz, 1H), 1.44 (d, *J* = 6.8 Hz, 3H).

ee = 53 %; [ $\alpha$ ]<sub>D</sub><sup>22</sup> = +7.4 (*c* = 0.00067, CH<sub>2</sub>Cl<sub>2</sub>); The enantiomeric excess and the absolute stereochemistry were determined by HPLC analysis:<sup>[2]</sup> *t<sub>R</sub>* (major) = 19.95 min; *t<sub>R</sub>* (minor) = 29.01 min (Daicel Chiralcel® OJ-H with an OJ-H guard column, hexane/2-propanol = 90:10, 0.5mL/min).

**The 1.0 mmol scale reaction:**

A flame-dried Schlenck tube with a magnetic stir bar was charged with hydrazone **1a** (238 mg, 1.00 mmol), catalyst **2a** (60 mg, 0.10 mmol) and CH<sub>2</sub>Cl<sub>2</sub> (4.0 mL), cooled to –50 °C, and then treated slowly with a solution of HSiCl<sub>3</sub> in CH<sub>2</sub>Cl<sub>2</sub> (1.0 mL, 1.5 M). The reaction mixture was stirred at –40 °C for 20 hours, and then quenched by pouring it into 120 mL of saturated aqueous NaHCO<sub>3</sub> solution cooled to 0 °C. The resulting mixture was vigorously stirred for 30 min. at room temperature and extracted twice with 60 mL of CH<sub>2</sub>Cl<sub>2</sub>. The combined organic layers were dried over Na<sub>2</sub>SO<sub>4</sub>, filtered, and condensed *in vacuo*. A <sup>1</sup>H NMR spectrum of the crude reaction mixture was taken with 1,1,2,2-tetrachloroethane as an internal standard (40% NMR yield). The crude material was purified by flash column chromatography on silica gel with 2% Et<sub>2</sub>O in CH<sub>2</sub>Cl<sub>2</sub> to afford the title compound as a white solid (90 mg, 37%), followed by 50% EtOAc in CH<sub>2</sub>Cl<sub>2</sub> to recover catalyst **2a** (60 mg, >99%).

**(+)-tert-Butyl 2-(1-phenylethyl)hydrazinecarboxylate (3b):**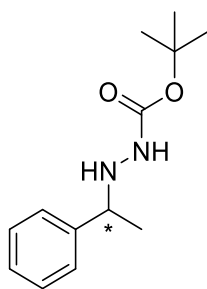

A <sup>1</sup>H NMR spectrum of the crude reaction mixture was taken with 1,1,2,2-tetrachloroethane as an internal standard (36% NMR yield). A fraction of the crude

mixture was purified by prep TLC using 5% EtOAc in CH<sub>2</sub>Cl<sub>2</sub> as an eluent for characterization purposes.

All spectral data were consistent with the literature values.<sup>[5]</sup>

<sup>1</sup>H NMR (400 MHz, CDCl<sub>3</sub>) δ 7.35-7.26 (m, 5H), 5.97 (br s, 1H), 4.18 (br s, 2H), 1.44 (s, 9H), 1.33 (d, *J* = 6.8 Hz, 3H).

ee = approximately 71 %; [α]<sup>23</sup><sub>D</sub> = +39.3 (c = 0.00067, CH<sub>2</sub>Cl<sub>2</sub>); The enantiomeric excess was estimated by HPLC analysis as both enantiomers were not fully separated at the base line: *t<sub>R</sub>* (major) = 20.63 min; *t<sub>R</sub>* (minor) = 17.25 min (Daicel Chiralcel® OJ-H with an OJ-H guard column, hexane/2-propanol = 99:1, 0.5mL/min).

**(*R*)-Benzyl-2-(1-phenylethyl)hydrazine-1-carboxylate (3c):**

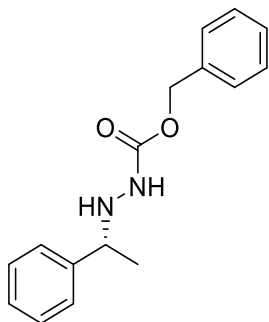

A <sup>1</sup>H NMR spectrum of the crude reaction mixture was taken with 1,1,2,2-tetrachloroethane as an internal standard (21% NMR yield). A fraction of the crude mixture was purified by prep TLC using 5% EtOAc in CH<sub>2</sub>Cl<sub>2</sub> as an eluent for characterization purposes.

All spectral data were consistent with the literature values.<sup>[6]</sup>

<sup>1</sup>H NMR (400 MHz, CDCl<sub>3</sub>) δ 7.35-7.27 (m, 10H), 6.13 (br s, 1H), 5.12 (s, 2H), 4.21 (br s, 2H), 1.34 (d, *J* = 6.4 Hz, 3H).

ee = 64 %;  $[\alpha]_D^{23} = +60.4$  ( $c = 0.00067$ ,  $\text{CH}_2\text{Cl}_2$ ); The enantiomeric excess and the absolute stereochemistry were determined by HPLC analysis:<sup>[6]</sup>  $t_R$  (major) = 43.57 min;  $t_R$  (minor) = 33.45 min (Daicel Chiralcel® OJ-H with an OJ-H guard column, hexane/2-propanol = 90:10, 0.5mL/min).

**(*R*)-1-Phenyl-1-(2-*p*-nitrobenzoylhydrazino)ethane (3d):**

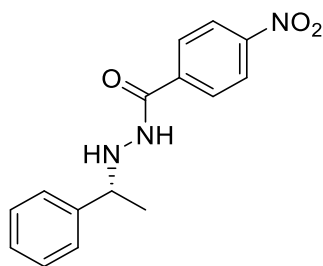

A  $^1\text{H}$  NMR spectrum of the crude reaction mixture was taken with 1,1,2,2-tetrachloroethane as an internal standard (14% NMR yield). A fraction of the crude mixture was purified by prep TLC using 20% EtOAc in  $\text{CH}_2\text{Cl}_2$  as an eluent for characterization purposes.

$^1\text{H}$  NMR (400 MHz,  $\text{CDCl}_3$ )  $\delta$  8.24 (d,  $J = 8.8$  Hz, 2H), 7.77 (d,  $J = 8.8$  Hz, 2H), 7.54 (d,  $J = 5.6$  Hz, 1H), 7.41-7.29 (m, 5H), 5.11 (br d,  $J = 4.8$  Hz, 1H), 4.26 (q,  $J = 6.4$  Hz, 1H), 1.45 (d,  $J = 6.4$  Hz, 3H).

$^{13}\text{C}$  NMR (100 MHz,  $\text{CDCl}_3$ )  $\delta$  165.2, 149.8, 142.7, 138.5, 128.7, 128.1, 127.8, 127.2, 123.9, 60.1, 21.3.

IR (thin film): 3276, 2973, 1642, 1522, 1343, 867, 848, 760, 715, 699  $\text{cm}^{-1}$

HRMS (ESI): Exact mass calculated for  $\text{C}_{15}\text{H}_{16}\text{N}_3\text{O}_3^+$   $[\text{M}+\text{H}]^+$  expected: 286.1186, found: 286.1188.

ee = 69 %;  $[\alpha]^{23}_{\text{D}} = +84.9$  ( $c = 0.00067$ ,  $\text{CH}_2\text{Cl}_2$ ); The enantiomeric excess and the absolute stereochemistry were determined by HPLC analysis:<sup>[7]</sup>  $t_R$  (major) = 57.56 min;  $t_R$  (minor) = 51.44 min (Daicel Chiralcel® OJ-H with an OJ-H guard column, hexane/2-propanol = 90:10, 0.5mL/min).

**(*R*)-*N'*-(1-(*p*-Tolyl)ethyl)benzohydrazide (3e):**

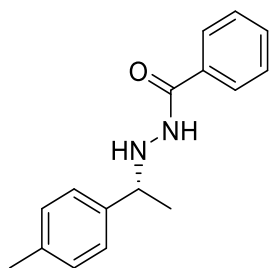

A  $^1\text{H}$  NMR spectrum of the crude reaction mixture was taken with 1,1,2,2-tetrachloroethane as an internal standard (27% NMR yield). A fraction of the crude mixture was purified by prep TLC using 20% EtOAc in  $\text{CH}_2\text{Cl}_2$  as an eluent for characterization purposes.

All spectral data were consistent with the literature values.<sup>[2]</sup>

$^1\text{H}$  NMR (400 MHz,  $\text{CDCl}_3$ )  $\delta$  7.64-7.61 (m, 2H), 7.51-7.47 (m, 1H), 7.41-7.38 (m, 3H), 7.30 (d,  $J = 8.0$  Hz, 2H), 7.17 (d,  $J = 8.0$  Hz, 2H), 5.09 (b rs, 1H), 4.23 (q,  $J = 6.8$  Hz, 1H), 2.36 (s, 3H), 1.42 (d,  $J = 6.8$  Hz, 3H).

ee = 57 %;  $[\alpha]^{23}_{\text{D}} = +8.5$  ( $c = 0.00067$ ,  $\text{CH}_2\text{Cl}_2$ ); The enantiomeric excess and the absolute stereochemistry were determined by HPLC analysis:<sup>[2]</sup>  $t_R$  (major) = 17.27 min;  $t_R$  (minor) = 31.13 min (Daicel Chiralcel® OJ-H with an OJ-H guard column, hexane/2-propanol = 90:10, 0.5mL/min).



**(*R*)-*N*'-(1-(*m*-Tolyl)ethyl)benzohydrazide (3f):**

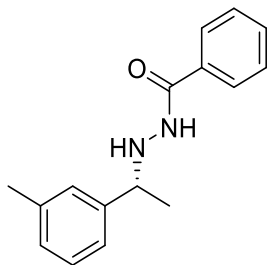

A  $^1\text{H}$  NMR spectrum of the crude reaction mixture was taken with 1,1,2,2-tetrachloroethane as an internal standard (49% NMR yield). A fraction of the crude mixture was purified by prep TLC using 20% EtOAc in  $\text{CH}_2\text{Cl}_2$  as an eluent for characterization purposes.

All spectral data were consistent with the literature values.<sup>[2]</sup>

$^1\text{H}$  NMR (400 MHz,  $\text{CDCl}_3$ )  $\delta$  7.63 (d,  $J$  = 7.2 Hz, 2H), 7.51-7.38 (m, 4H), 7.26-7.19 (m, 3H), 7.11 (d,  $J$  = 7.2 Hz, 1H), 5.10 (br s, 1H), 4.22 (q,  $J$  = 6.8 Hz, 1H), 2.36 (s, 3H), 1.43 (d,  $J$  = 6.8 Hz, 3H).

ee = 41 %;  $[\alpha]_D^{22}$  = +29.0 ( $c$  = 0.0013,  $\text{CH}_2\text{Cl}_2$ ); The enantiomeric excess and the absolute stereochemistry were determined by HPLC analysis:<sup>[2]</sup>  $t_R$  (major) = 25.65 min;  $t_R$  (minor) = 29.36 min (Daicel Chiralcel® OJ-H with an OJ-H guard column, hexane/2-propanol = 95:5, 0.5mL/min).

**(*R*)-*N*'-(1-(4-Methoxyphenyl)ethyl)benzohydrazide (3h):**

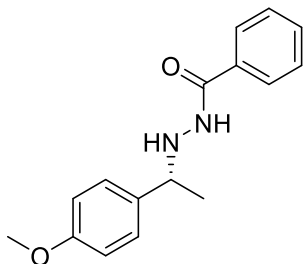

A  $^1\text{H}$  NMR spectrum of the crude reaction mixture was taken with 1,1,2,2-tetrachloroethane as an internal standard (12% NMR yield). A fraction of the crude mixture was purified by prep TLC using 20% EtOAc in  $\text{CH}_2\text{Cl}_2$  as an eluent for characterization purposes.

All spectral data were consistent with the literature values.<sup>[2]</sup>

$^1\text{H}$  NMR (400 MHz,  $\text{CDCl}_3$ )  $\delta$  7.64-7.61 (m, 2H), 7.51-7.47 (m, 1H), 7.42-7.38 (m, 3H), 7.34-7.31 (m, 2H), 6.91-6.88 (m, 2H), 5.08 (b rs, 1H), 4.22 (q,  $J$  = 6.8 Hz, 1H), 3.82 (s, 3H), 1.42 (d,  $J$  = 6.8 Hz, 3H).

ee = 58 %;  $[\alpha]_D^{22} = +23.8$  ( $c$  = 0.0013,  $\text{CH}_2\text{Cl}_2$ ); The enantiomeric excess and the absolute stereochemistry were determined by HPLC analysis:<sup>[2]</sup>  $t_R$  (major) = 35.59 min;  $t_R$  (minor) = 59.24 min (Daicel Chiralcel® OJ-H with an OJ-H guard column, hexane/2-propanol = 90:10, 0.5mL/min).

**(*R*)-*N'*-(1-(4-Fluorophenyl)ethyl)benzohydrazide (3i):**

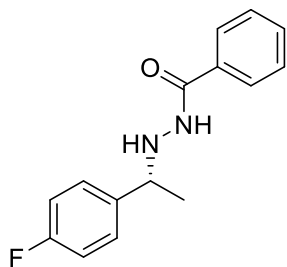

A  $^1\text{H}$  NMR spectrum of the crude reaction mixture was taken with 1,1,2,2-tetrachloroethane as an internal standard (28% NMR yield). A fraction of the crude mixture was purified by prep TLC using 20% EtOAc in  $\text{CH}_2\text{Cl}_2$  as an eluent for characterization purposes.

All spectral data were consistent with the literature values.<sup>[2]</sup>

$^1\text{H}$  NMR (400 MHz,  $\text{CDCl}_3$ )  $\delta$  7.63-7.61 (m, 2H), 7.52-7.35 (m, 6H), 7.04 (dd,  $J$  = 8.4, 8.4 Hz, 2H), 5.06 (br s, 1H), 4.26 (q,  $J$  = 6.8 Hz, 1H), 1.41 (d,  $J$  = 6.8 Hz, 3H).

ee = 37 %;  $[\alpha]^{23}_{\text{D}} = +3.4$  ( $c$  = 0.00067,  $\text{CH}_2\text{Cl}_2$ ); The enantiomeric excess and the absolute stereochemistry were determined by HPLC analysis:<sup>[2]</sup>  $t_R$  (major) = 21.37 min;  $t_R$  (minor) = 27.53 min (Daicel Chiralcel® OJ-H with an OJ-H guard column, hexane/2-propanol = 90:10, 0.5mL/min).

**(*R*)-*N*-(1-(4-Chlorophenyl)ethyl)benzohydrazide (3j):**

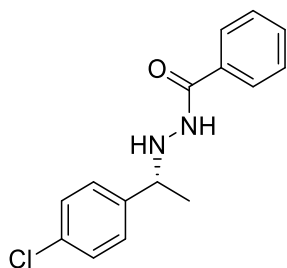

A  $^1\text{H}$  NMR spectrum of the crude reaction mixture was taken with 1,1,2,2-tetrachloroethane as an internal standard (22% NMR yield). A fraction of the crude mixture was purified by prep TLC using 20% EtOAc in  $\text{CH}_2\text{Cl}_2$  as an eluent for characterization purposes.

All spectral data were consistent with the literature values.<sup>[2]</sup>

$^1\text{H}$  NMR (400 MHz,  $\text{CDCl}_3$ )  $\delta$  7.62 (d,  $J$  = 7.2 Hz, 2H), 7.52-7.48 (m, 1H), 7.42-7.29 (m, 7H), 5.05 (br d,  $J$  = 4.8 Hz, 1H), 4.27-4.23 (m, 1H), 1.41 (d,  $J$  = 6.4 Hz, 3H).

ee = 43 %;  $[\alpha]^{23}_{\text{D}} = +50.4$  ( $c$  = 0.00067,  $\text{CH}_2\text{Cl}_2$ ); The enantiomeric excess and the absolute stereochemistry were determined by HPLC analysis:<sup>[2]</sup>  $t_R$  (major) = 20.97 min;  $t_R$  (minor) = 26.49 min (Daicel Chiralcel® OJ-H with an OJ-H guard column, hexane/2-propanol = 90:10, 0.5mL/min).

**(R)-N'-(1-(4-Bromophenyl)ethyl)benzohydrazide (3k):**

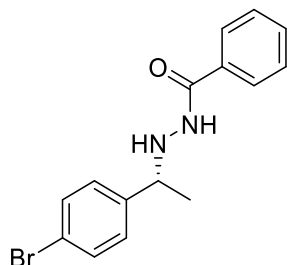

A  $^1\text{H}$  NMR spectrum of the crude reaction mixture was taken with 1,1,2,2-tetrachloroethane as an internal standard (27% NMR yield). A fraction of the crude mixture was purified by prep TLC using 20% EtOAc in  $\text{CH}_2\text{Cl}_2$  as an eluent for characterization purposes.

All spectral data were consistent with the literature values.<sup>[2]</sup>

$^1\text{H}$  NMR (400 MHz,  $\text{CDCl}_3$ )  $\delta$  7.62 (d,  $J$  = 7.6 Hz, 2H), 7.52-7.39 (m, 6H), 7.29 (d,  $J$  = 8.4 Hz, 2H), 5.06 (br s, 1H), 4.24 (q,  $J$  = 6.4 Hz, 1H), 1.40 (d,  $J$  = 6.4 Hz, 3H).

ee = 44 %;  $[\alpha]^{23}_{\text{D}}$  = +50.7 ( $c$  = 0.002,  $\text{CH}_2\text{Cl}_2$ ); The enantiomeric excess and the absolute stereochemistry were determined by HPLC analysis:<sup>[2]</sup>  $t_R$  (major) = 23.36 min;  $t_R$  (minor) = 29.21 min (Daicel Chiralcel® OJ-H with an OJ-H guard column, hexane/2-propanol = 90:10, 0.5mL/min).

**(R)-N'-(1-(4-(Trifluoromethyl)phenyl)ethyl)benzohydrazide (3l):**

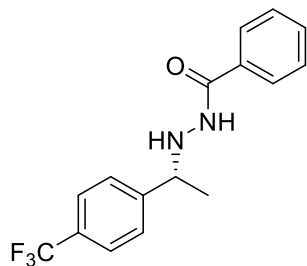

A  $^1\text{H}$  NMR spectrum of the crude reaction mixture was taken with 1,1,2,2-tetrachloroethane as an internal standard (37% NMR yield). A fraction of the crude mixture was purified by prep TLC using 20% EtOAc in  $\text{CH}_2\text{Cl}_2$  as an eluent for characterization purposes.

All spectral data were consistent with the literature values.<sup>[2]</sup>

$^1\text{H}$  NMR (400 MHz,  $\text{CDCl}_3$ )  $\delta$  7.63-7.61 (m, 4H), 7.53 (d,  $J$  = 8.0 Hz, 2H), 7.51-7.48 (m, 1H), 7.42-7.38 (m, 3H), 5.07 (br d,  $J$  = 6.8 Hz, 1H), 4.37-4.32 (m, 1H), 1.44 (d,  $J$  = 6.8 Hz, 3H).

ee = 35 %;  $[\alpha]^{23}_{\text{D}} = +56.1$  ( $c$  = 0.00067,  $\text{CH}_2\text{Cl}_2$ ); The enantiomeric excess and the absolute stereochemistry were determined by HPLC analysis:<sup>[6]</sup>  $t_R$  (major) = 28.48 min;  $t_R$  (minor) = 25.77 min (Daicel Chiralpak<sup>®</sup> AS-H with an AS-H guard column, hexane/2-propanol = 80:20, 0.5mL/min).

**(*R*)-*N'*-(1-(Naphthalen-2-yl)ethyl)benzohydrazide (3m):**

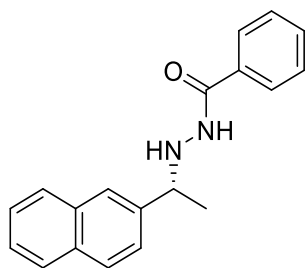

A  $^1\text{H}$  NMR spectrum of the crude reaction mixture was taken with 1,1,2,2-tetrachloroethane as an internal standard (38% NMR yield). A fraction of the crude mixture was purified by prep TLC using 20% EtOAc in  $\text{CH}_2\text{Cl}_2$  as an eluent for characterization purposes.

All spectral data were consistent with the literature values.<sup>[8]</sup>

$^1\text{H}$  NMR (400 MHz,  $\text{CDCl}_3$ )  $\delta$  7.87-7.81 (m, 4H), 7.61-7.56 (m, 3H), 7.50-7.44 (m, 4H), 7.37-7.34 (m, 2H), 5.19 (br d,  $J$  = 5.2 Hz, 1H), 4.43 (q,  $J$  = 6.8 Hz, 1H), 1.51 (d,  $J$  = 6.8 Hz, 3H).

ee = 43 %;  $[\alpha]^{23}_{\text{D}}$  = +82.4 ( $c$  = 0.00067,  $\text{CH}_2\text{Cl}_2$ ); The enantiomeric excess and the absolute stereochemistry were determined by HPLC analysis:<sup>[8]</sup>  $t_R$  (major) = 36.05 min;  $t_R$  (minor) = 43.91 min (Daicel Chiralcel® OJ-H with an OJ-H guard column, hexane/2-propanol = 85:15, 0.5mL/min).

**(*R*)-*N'*-(1-(Thiophen-2-yl)ethyl)benzohydrazide (3n):**

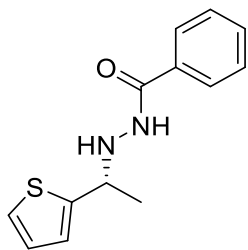

A  $^1\text{H}$  NMR spectrum of the crude reaction mixture was taken with 1,1,2,2-tetrachloroethane as an internal standard (33% NMR yield). A fraction of the crude mixture was purified by prep TLC using 20% EtOAc in  $\text{CH}_2\text{Cl}_2$  as an eluent for characterization purposes.

All spectral data were consistent with the literature values.<sup>[2]</sup>

$^1\text{H}$  NMR (400 MHz,  $\text{CDCl}_3$ )  $\delta$  7.67 (d,  $J$  = 7.2 Hz, 2H), 7.53-7.49 (m, 2H), 7.44-7.40 (m, 2H), 7.28-7.26 (m, 1H), 7.00-6.97 (m, 2H), 5.14 (br d,  $J$  = 4.8 Hz, 1H), 4.60-4.56 (m, 1H), 1.53 (d,  $J$  = 6.8 Hz, 3H).

ee = 38 %;  $[\alpha]^{23}_{\text{D}}$  = +32.5 ( $c$  = 0.001,  $\text{CH}_2\text{Cl}_2$ ); The enantiomeric excess and the absolute stereochemistry were determined by HPLC analysis:<sup>[2]</sup>  $t_R$  (major) = 26.72 min;

$t_R$  (minor) = 32.39 min (Daicel Chiralcel® OJ-H with an OJ-H guard column, hexane/2-propanol = 90:10, 0.5mL/min).

**(*R*)-*N'*-(1-Phenylpropyl)benzohydrazide (3o):**

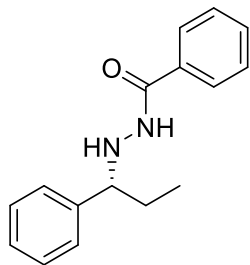

A  $^1\text{H}$  NMR spectrum of the crude reaction mixture was taken with 1,1,2,2-tetrachloroethane as an internal standard (44% NMR yield). A fraction of the crude mixture was purified by prep TLC using 20% EtOAc in  $\text{CH}_2\text{Cl}_2$  as an eluent for characterization purposes, which provided 2.5 mg of the title compound. The remaining crude mixture was purified by flash column chromatography on silica gel with 2%  $\text{Et}_2\text{O}$  in  $\text{CH}_2\text{Cl}_2$  to afford 23 mg of the title compound (total 25.5 mg, 40%).

All spectral data were consistent with the literature values.<sup>[6]</sup>

$^1\text{H}$  NMR (400 MHz,  $\text{CDCl}_3$ )  $\delta$  7.60-7.58 (m, 2H), 7.49-7.46 (m, 1H), 7.40-7.33 (m, 7H), 7.32-7.27 (m, 1H), 5.18 (br d,  $J$  = 5.6 Hz, 1H), 4.00 (br dd,  $J$  = 6.8, 7.2 Hz, 1H), 1.94-1.83 (m, 1H), 1.77-1.66 (m, 1H), 0.87 (t,  $J$  = 7.6 Hz, 3H).

ee = 36 %;  $[\alpha]_D^{23}$  = +37.2 ( $c$  = 0.0013,  $\text{CH}_2\text{Cl}_2$ ); The enantiomeric excess and the absolute stereochemistry were determined by HPLC analysis:<sup>[6]</sup>  $t_R$  (major) = 16.49 min;  $t_R$  (minor) = 19.55 min (Daicel Chiralcel® OJ-H with an OJ-H guard column, hexane/2-propanol = 90:10, 0.5mL/min).

**(S)-N'-(1-Cyclohexylethyl)benzohydrazide (3p):**

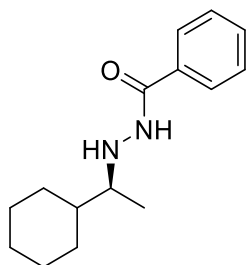

A  $^1\text{H}$  NMR spectrum of the crude reaction mixture was taken with 1,1,2,2-tetrachloroethane as an internal standard (33% NMR yield). A fraction of the crude mixture was purified by prep TLC using 20% EtOAc in  $\text{CH}_2\text{Cl}_2$  as an eluent for characterization purposes.

All spectral data were consistent with the literature values.<sup>[9]</sup>

$^1\text{H}$  NMR (400 MHz,  $\text{CDCl}_3$ )  $\delta$  7.76-7.74 (m, 2H), 7.54-7.43 (m, 4H), 4.89 (br s, 1H), 2.94-2.88 (m, 1H), 1.78-1.67 (m, 6H), 1.47-1.40 (m, 1H), 1.31-1.09 (m, 4H), 1.06 (d,  $J$  = 6.4 Hz, 3H).

ee = 46 %;  $[\alpha]^{21}_{\text{D}} = +4.1$  ( $c$  = 0.001,  $\text{CH}_2\text{Cl}_2$ ); The enantiomeric excess and the absolute stereochemistry were determined by HPLC analysis:<sup>[9]</sup>  $t_R$  (major) = 36.08 min;  $t_R$  (minor) = 41.83 min (Daicel Chiralcel<sup>®</sup> OJ-H with an OJ-H guard column, hexane/2-propanol = 99:1, 0.5mL/min).

**(+)-N'-(4-Phenylbutan-2-yl)benzohydrazide (3q):**



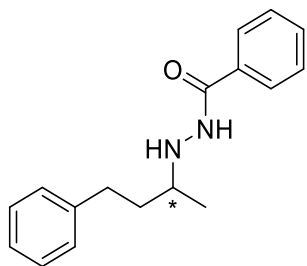

A  $^1\text{H}$  NMR spectrum of the crude reaction mixture was taken with 1,1,2,2-tetrachloroethane as an internal standard (48% NMR yield). A fraction of the crude mixture was purified by prep TLC using 20% EtOAc in  $\text{CH}_2\text{Cl}_2$  as an eluent for characterization purposes, which provided 3 mg of the title compound. The remaining crude mixture was purified by flash column chromatography on silica gel with 2%  $\text{Et}_2\text{O}$  in  $\text{CH}_2\text{Cl}_2$  and then with 5%  $\text{Et}_2\text{O}$  in  $\text{CH}_2\text{Cl}_2$  to afford 26 mg of the title compound (total 29 mg, 43%).

$^1\text{H}$  NMR (400 MHz,  $\text{CDCl}_3$ )  $\delta$  7.74-7.72 (m, 2H), 7.55-7.43 (m, 4H), 7.31-7.17 (m, 5H), 4.91 (br s, 1H), 3.17-3.12 (m, 1H), 2.80-2.65 (m, 2H), 1.94-1.85 (m, 1H), 1.73-1.61 (m, 1H), 1.18 (d,  $J = 6.4$  Hz, 3H).

$^{13}\text{C}$  NMR (100 MHz,  $\text{CDCl}_3$ )  $\delta$  167.5, 142.1, 132.9, 131.8, 128.7, 128.4, 128.3, 126.8, 125.8, 55.6, 36.7, 32.1, 18.6.

IR (thin film): 3315, 1640, 1539, 1472, 1456, 1377, 905, 894, 854, 729, 696  $\text{cm}^{-1}$

HRMS (ESI): Exact mass calculated for  $\text{C}_{17}\text{H}_{21}\text{N}_2\text{O}^+$   $[\text{M}+\text{H}]^+$  expected: 269.1648, found: 269.1652.

ee = 14 %;  $[\alpha]_D^{21} = +4.7$  ( $c = 0.002$ ,  $\text{CH}_2\text{Cl}_2$ ); The enantiomeric excess was determined by HPLC analysis:  $t_R$  (major) = 37.17 min;  $t_R$  (minor) = 30.40 min (Daicel Chiralcel® OD-H with an OD-H guard column, hexane/2-propanol = 90:10, 0.5mL/min).

**(R)-N'-(4-Phenyl-3-buten-2-yl)benzohydrazide (3r):**

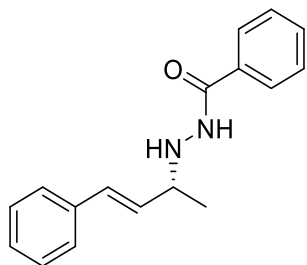

A  $^1\text{H}$  NMR spectrum of the crude reaction mixture was taken with 1,1,2,2-tetrachloroethane as an internal standard (**3r**: 4% NMR yield; **3q**: 19% NMR yield). A fraction of the crude mixture was purified by prep TLC using 20% EtOAc in  $\text{CH}_2\text{Cl}_2$  as an eluent for characterization purposes. Compounds **3r** and **3q** were isolated as an inseparable mixture.

The mixture of **3r** and **3q** was analyzed by LC/MS (ES-APCI):  $t_R$  (**3r**) = 31.567 min, calculated for  $\text{C}_{17}\text{H}_{19}\text{N}_2\text{O}^+$   $[\text{M}+\text{H}]^+$  expected: 267.1, found: 267.2;  $t_R$  (**3q**) = 31.344 min, calculated for  $\text{C}_{17}\text{H}_{21}\text{N}_2\text{O}^+$   $[\text{M}+\text{H}]^+$  expected: 269.2, found: 269.2 (LC column: Poroshell120-EC-C18 43.0\*50 mm, 2.7  $\mu\text{m}$ ; 24  $^\circ\text{C}$ ;  $\text{H}_2\text{O}$ /Methanol=90:10; 0.5 ml/min).

Racemic **3r** was prepared by sodium cyanoborohydride reduction of the corresponding hydrazone, which also produced **3q** (**3r**:**3q** = ca. 4:1). While enantiomers of **3q** were fully separated on Daicel Chiralcel<sup>®</sup> OD-H (*vide supra*), enantiomers of **3r** were not separable from those of **3q**. We found out that enantiomers of **3r** were separable from those of **3q** under following HPLC condition: Daicel Chiralpak<sup>®</sup> AD-H with an AD-H guard column, hexane/2-propanol = 92:8, 0.5 mL/min. The first peak ( $t_R$  = 36.56) and second peak ( $t_R$  = 40.21) were the corresponding enantiomers of **3r**, and the third peak ( $t_R$  = 45.41) and fourth peak ( $t_R$  = 48.85) were the corresponding enantiomers of **3q**.

Therefore, we were able to determine the ee of **3r**, as its enantiomers were fully

separated at the base line on the Daicel Chiralpak® AD-H column. However, the enantiomeric excess of **3q** was provided as an estimated value, for the enantiomers of **3q** were not fully separated at the base line by chiral HPLC on the Daicel Chiralpak® AD-H column.

**3r** : ee = 15 %; The enantiomeric excess and the absolute stereochemistry were determined by HPLC analysis:<sup>[10]</sup>  $t_R$  (major) = 40.47 min;  $t_R$  (minor) = 36.56 min (Daicel Chiralcel® AD-H with an AD-H guard column, hexane/2-propanol = 92:8, 0.5mL/min)

**3q** : ee = approximately 7 %; The enantiomeric excess was estimated by HPLC analysis as both enantiomers were not fully separated at the base line:  $t_R$  (major) = 45.25 min;  $t_R$  (minor) = 48.99 min (Daicel Chiralpak® AD-H with an AD-H guard column, hexane/2-propanol = 92:8, 0.5mL/min).

### 3. Computational Procedures.

All calculations have been performed with the Q-Chem 4 quantum chemistry code,<sup>[11]</sup> using the PBEh-3c density functional theory composite procedure.<sup>[12]</sup> Solvent effects have been included using the C-PCM method with the dielectric constant of DCM ( $\epsilon$  = 9.08). Minima are converged within a threshold of  $10^{-8}$  E<sub>h</sub>, and have been confirmed minima using frequency calculations. Molecular symmetry was not used because of the necessity of the C-PCM method. The C<sub>2</sub> symmetry expected for the two main minima (complex 1 and complex 2) is respected in an approximate manner. The initial structures for the geometry optimizations have been obtained via a molecular mechanics based conformational search algorithm, developed in-house. Given the fact that the molecules in this project and the nature of their interaction are well within the

limits of recent validation studies of the method that we used, we expect geometries to be converged within 0.05 Å accuracy,<sup>[14]</sup> and energies to be converged within 2 kcal/mol accuracy.<sup>[15]</sup> The structures of the minima for the complex and the free Lewis bases are also provided in cartesian coordinates (xyz) as additional supplementary text files.

#### 4. References:

- [1] Still, W. C.; Kahn, M.; Mitra A. *J. Org. Chem.* **1978**, *43*, 2923-2925.
- [2] Hu, Y.; Zhang, Z.; Zhang, J.; Liu, Y.; Gridnev, D.; Zhang, W. *Angew. Chem. Int. Ed.* **2019**, *58*, 15767-15771.
- [3] Sun, S.; Reep, C.; Zhang, C.; Captain, B.; Peverati, R.; Takenaka, N. *Tetrahedron Letters (in press)*
- [4] Reep, C.; Morgante, P.; Peverati, R.; Takenaka, N. *Org. Lett.* **2018**, *20*, 5757-5761.
- [5] Yoshikawa, N.; Tan, L.; McWilliams, J. C.; Ramasamy, D.; Sheppard, R. *Org. Lett.* **2010**, *12*, 276-279.
- [6] Yang, P.; Zhang, C.; Ma, Y.; Zhang, C.; Li, A.; Tang, B.; Zhou, J. *Angew. Chem. Int. Ed.* **2017**, *56*, 14702-14706.
- [7] Burk, M. J.; Martinez, J. P.; Feaster, J. E.; Cosford, N. *Tetrahedron* **1994**, *50*, 4399-4428.
- [8] Chang, M.; Liu, S.; Huang, K.; Zhang, X. *Org. Lett.* **2013**, *15*, 4354-4357.
- [9] Yang, P.; Lim, Li H.; Chuanprasit, P.; Hirao, H.; Zhou, J. *Angew. Chem. Int. Ed.* **2016**, *55*, 12083-12087.
- [10] Wang, Y.; Xu, J.; Gu, Y.; Tian, S. *Org. Chem. Front.* **2014**, *1*, 812-816.
- [11] Shao, Y.; *et al.*, *Mol. Phys.* **2015**, *113*, 184-215.

- [12] Grimme, S.; Brandenburg, G; Bannwarth, C.; Hansen, A., *J. Chem. Phys.* **2015**, *143*, 054107.
- [13] Barone, V.; Cossi, M., *J. Phys. Chem. A* **1998**, *102*, 1995; Truong, T. N.; Stefanovich, E. V., **Chem. Phys. Lett.**, **1995**, *240*, 253.
- [14] Morgante, P.; Peverati, R., *Chem. Phys. Lett.* **2021**, *765*, 138281.
- [15] Morgante, P.; Peverati, R., *Phys. Chem. Chem. Phys. Lett.* **2019**, *21*, 19092-19103.

ph

7.484  
7.480  
7.469  
7.466  
7.463  
7.422  
7.418  
7.408  
7.401  
7.389  
7.377  
7.371  
7.359  
7.340  
7.315  
7.311  
7.307  
7.300  
7.293  
7.287  
7.279  
7.276  
7.272  
7.260  
5.101  
5.089  
4.286  
4.270  
4.253  
4.238

1.607  
1.445  
1.428

0.000

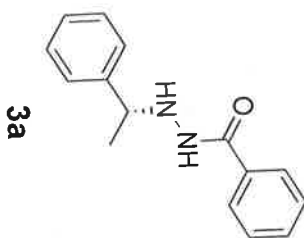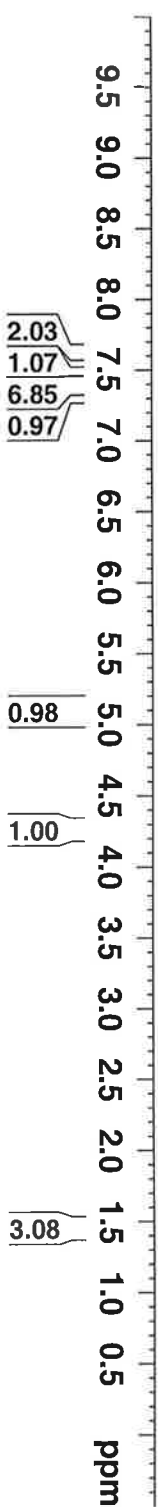

```

NAME                               Aug19-2021-sys
EXPNO                               10
PROCNO                              1
Date_                               20210819
Time                                13.36
INSTRUM                             spect
PROBHD                             5 mm PABBO BB-
PULPROG                             zg30
TD                                 65536
SOLVENT                             CDCl3
NS                                  16
DS                                  2
SWH                                 8278.146 Hz
FIDRES                             0.126314 Hz
AQ                                 3.9584243 sec
RG                                  322.5
DW                                 60.400 usec
DE                                 6.50 usec
TE                                  296.6 K
D1                                 1.00000000 sec
TD0                                 1

===== CHANNEL f1 =====
NUC1                                1H
P1                                 11.60 usec
PL1                                 3.00 dB
SFO1                              400.1324710 MHz
SI                                 32768
SF                                 400.1300098 MHz
WDW                                EM
SSB                                0
LB                                 0.30 Hz
GB                                 0
PC                                 1.00
  
```

RUN\_1002.DATA - Prostar 335 Absorbance Analog Channel 1 EL05079024

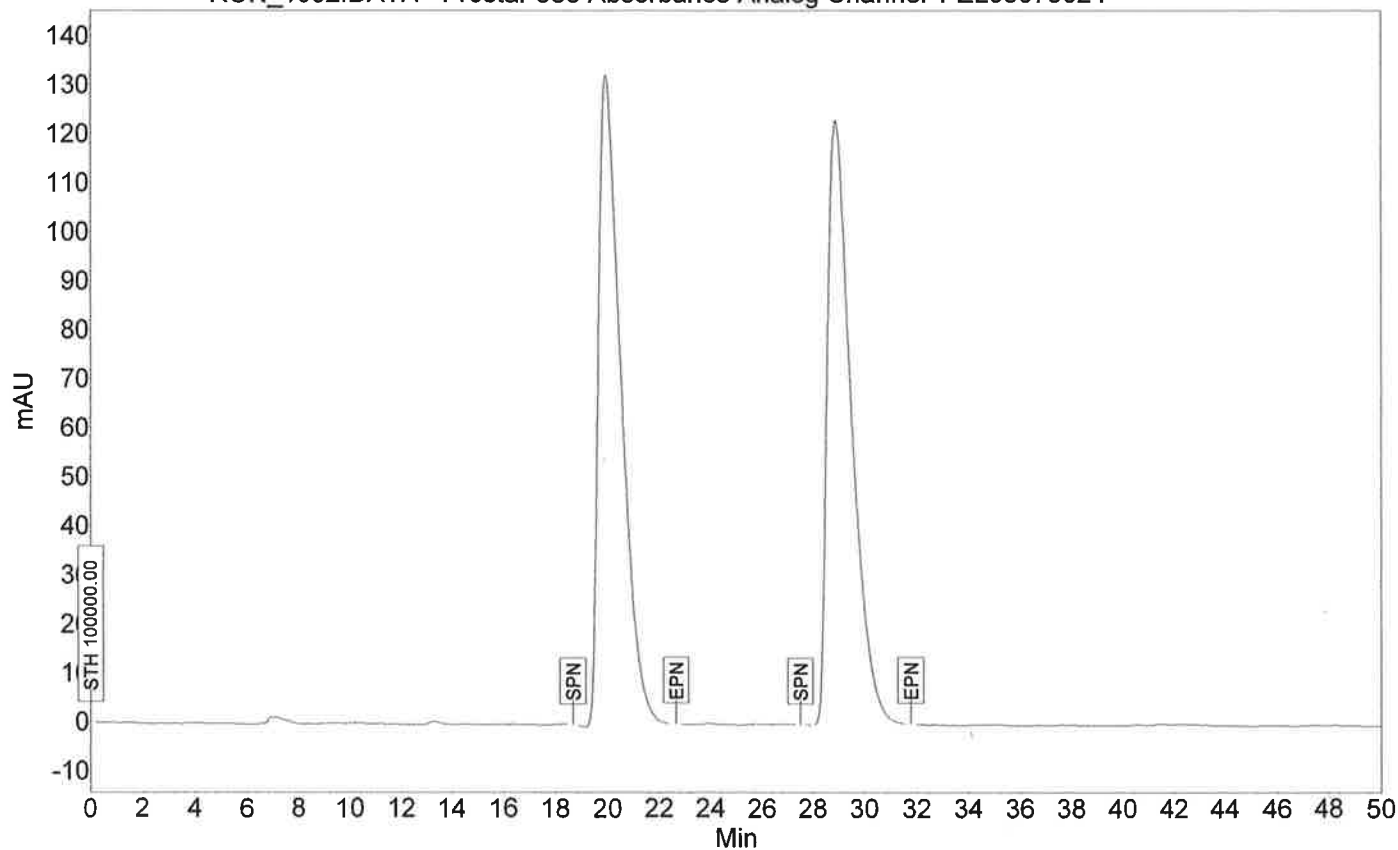

| Index | Name    | Time [Min] | Quantity [% Area] | Height [mAU] | Area [mAU.Min] | Area % [%] |
|-------|---------|------------|-------------------|--------------|----------------|------------|
| 1     | UNKNOWN | 19.91      | 49.78             | 132.5        | 132.7          | 49.783     |
| 2     | UNKNOWN | 28.87      | 50.22             | 123.3        | 133.8          | 50.217     |
| Total |         |            | 100.00            | 255.7        | 266.5          | 100.000    |

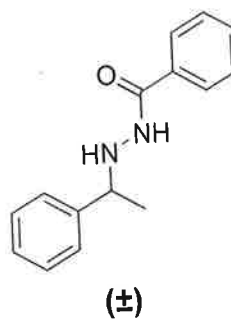

RUN\_1003.DATA - Prostar 335 Absorbance Analog Channel 1 EL05079024

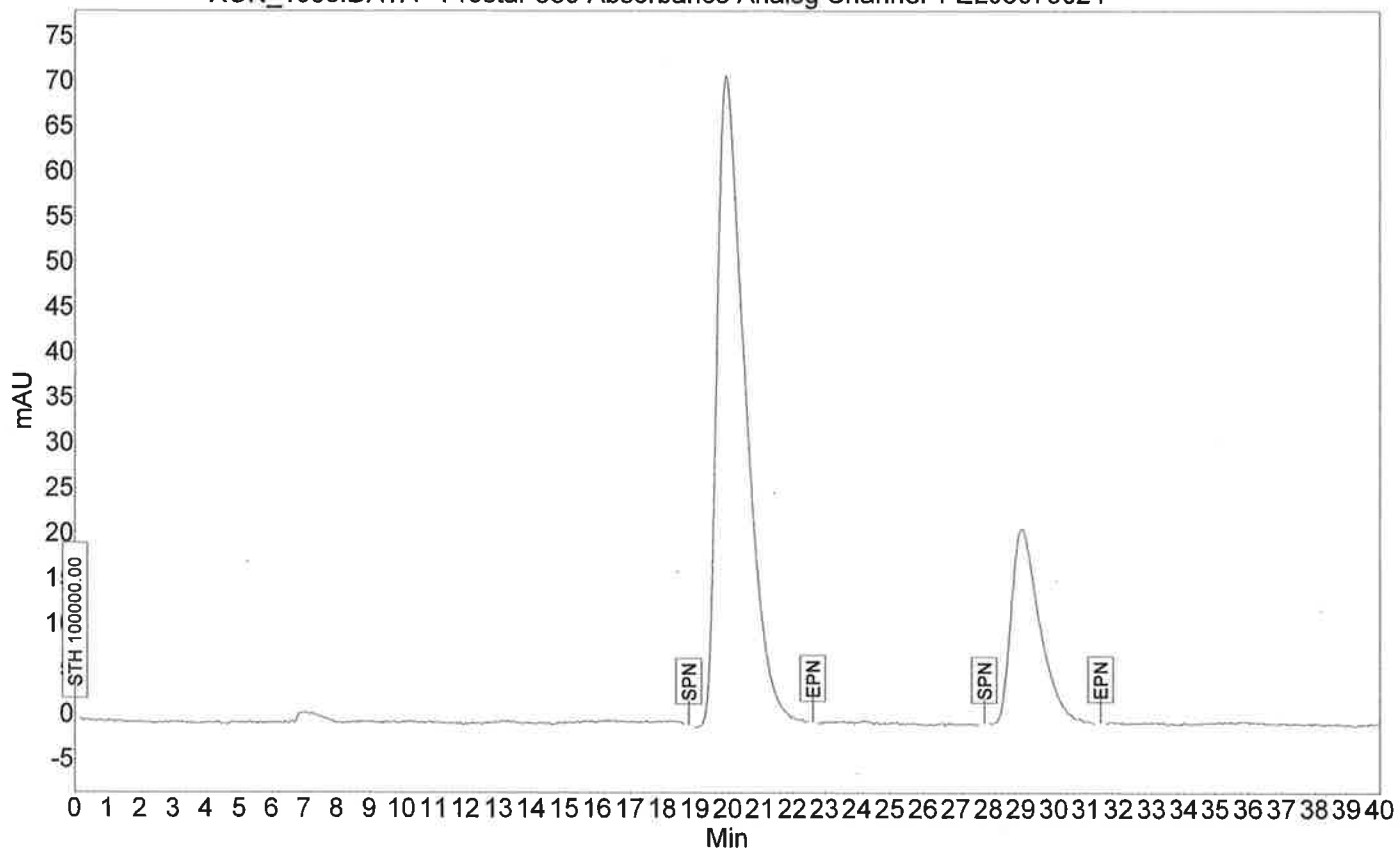

| Index | Name    | Time [Min] | Quantity [% Area] | Height [mAU] | Area [mAU.Min] | Area % [%] |
|-------|---------|------------|-------------------|--------------|----------------|------------|
| 1     | UNKNOWN | 19.95      | 76.72             | 71.6         | 71.5           | 76.715     |
| 2     | UNKNOWN | 29.01      | 23.28             | 21.5         | 21.7           | 23.285     |
| Total |         |            | 100.00            | 93.1         | 93.2           | 100.000    |

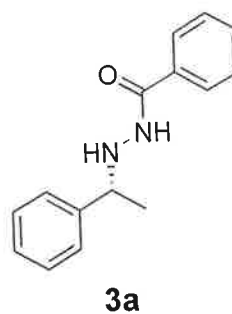



boc

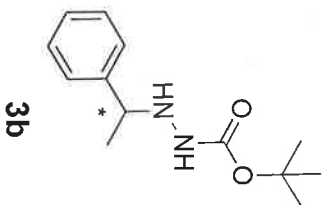

7.345  
7.330  
7.311  
7.284  
7.278  
7.270  
7.260  
— 5.969  
— 4.176  
1.611  
1.437  
1.336  
1.319  
— 0.000

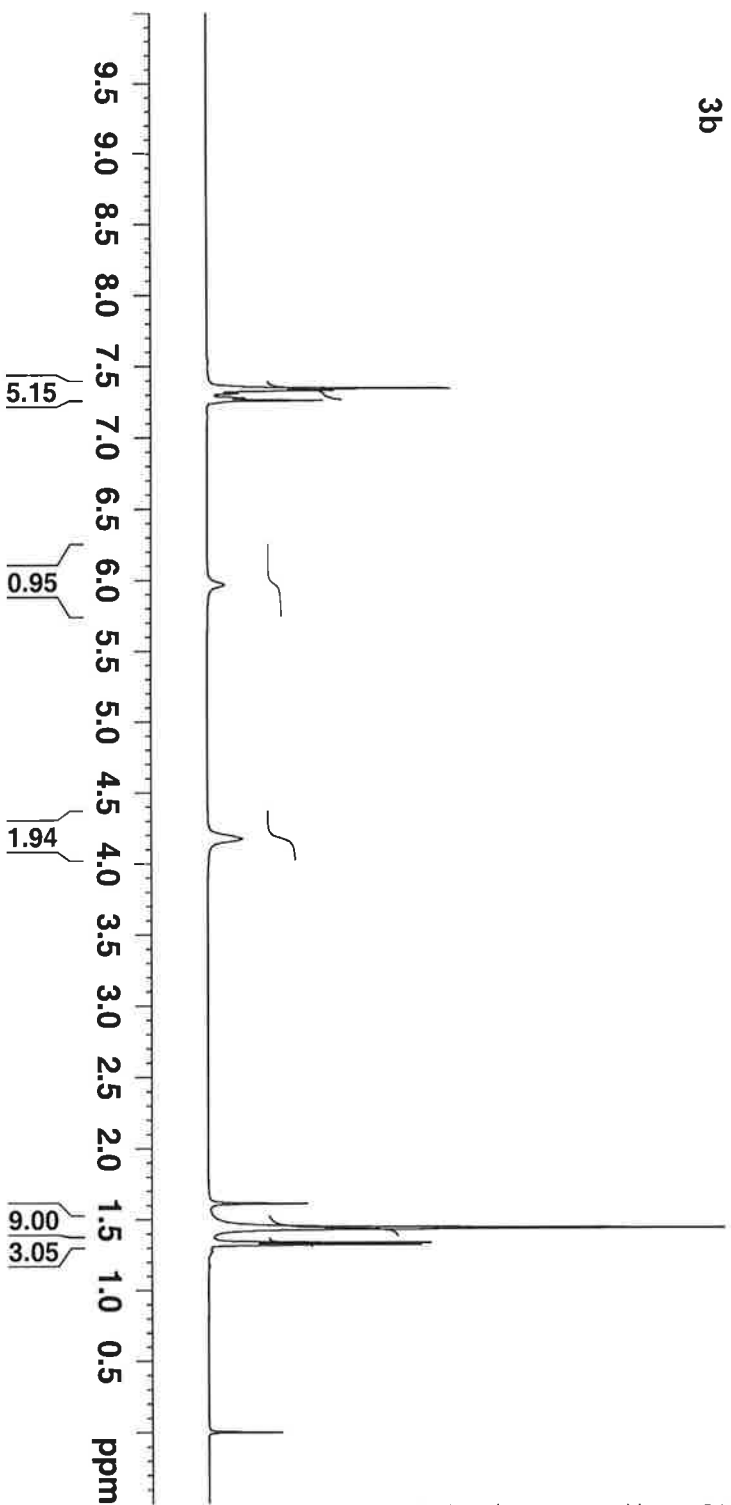

```

NAME      Aug19-2021-sys
EXPNO     30
PROCNO    1
Date_     20210819
Time      16.19
INSTRUM   spect
PROBHD    5 mm PABBO BB-
PULPROG   zg30
TD         65536
SOLVENT   CDCl3
NS         16
DS         2
SWH        8278.146 Hz
FIDRES     0.126314 Hz
AQ         3.9584243 sec
RG         228.1
DW         60.400 usec
DE         6.50 usec
TE         296.6 K
D1         1.0000000 sec
TD0        1

===== CHANNEL f1 =====
NUC1       1H
P1         11.60 usec
PL1        3.00 dB
SFO1       400.1324710 MHz
SI         32768
SF         400.1300092 MHz
WDW        EM
SSB        0
LB         0.30 Hz
GB         0
PC         1.00
  
```

RUN\_1040.DATA - Prostar 335 Absorbance Analog Channel 2 EL05079024

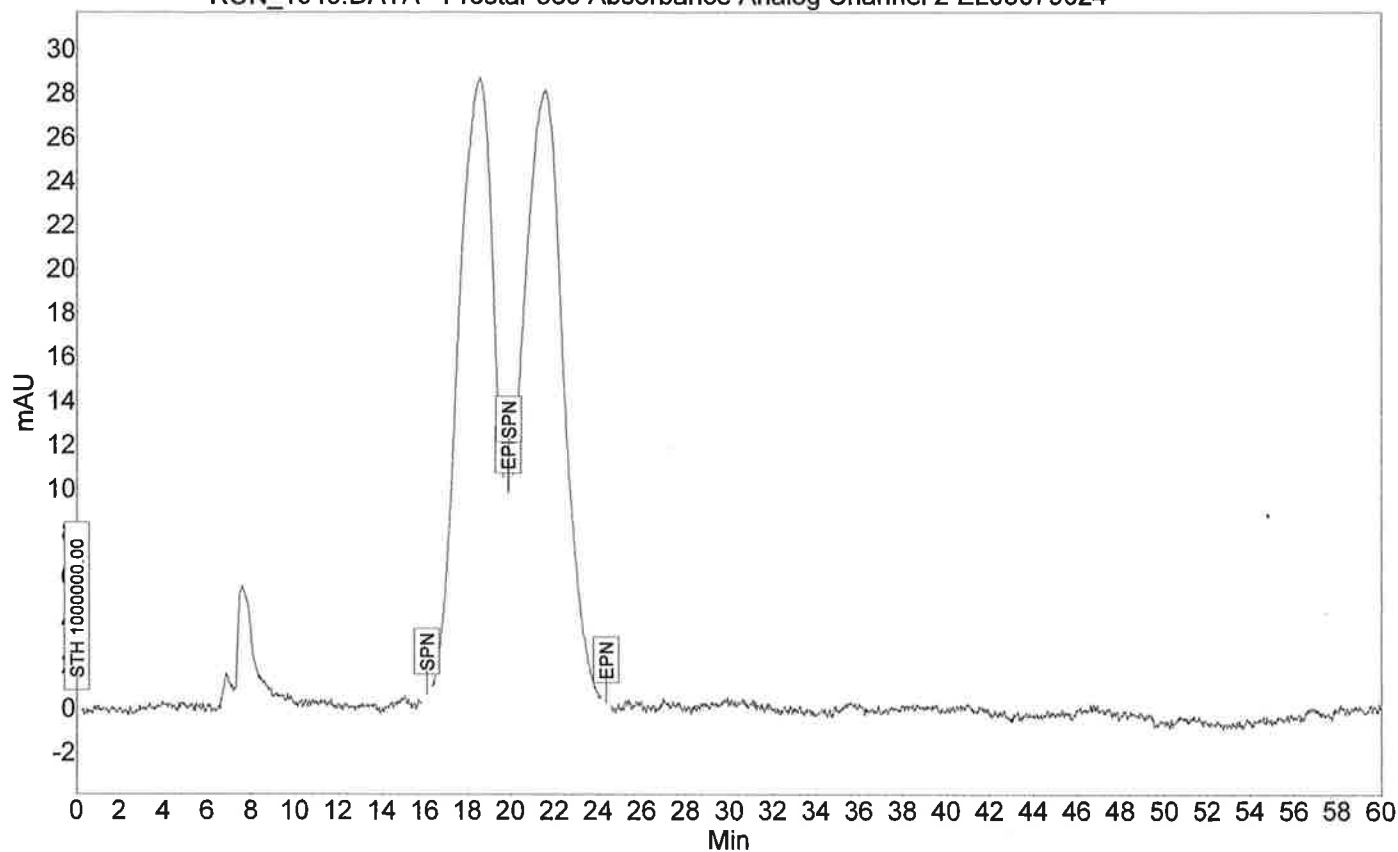

| Index | Name    | Time [Min] | Quantity [% Area] | Height [mAU] | Area [mAU.Min] | Area % [%] |
|-------|---------|------------|-------------------|--------------|----------------|------------|
| 1     | UNKNOWN | 18.44      | 49.82             | 22.1         | 38.4           | 49.821     |
| 2     | UNKNOWN | 21.64      | 50.18             | 22.0         | 38.7           | 50.179     |
|       |         |            |                   |              |                |            |
| Total |         |            | 100.00            | 44.1         | 77.1           | 100.000    |

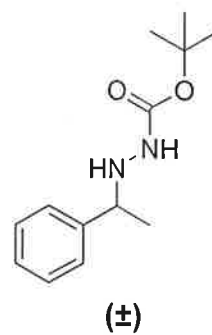

RUN\_1044.DATA - Prostar 335 Absorbance Analog Channel 2 EL05079024

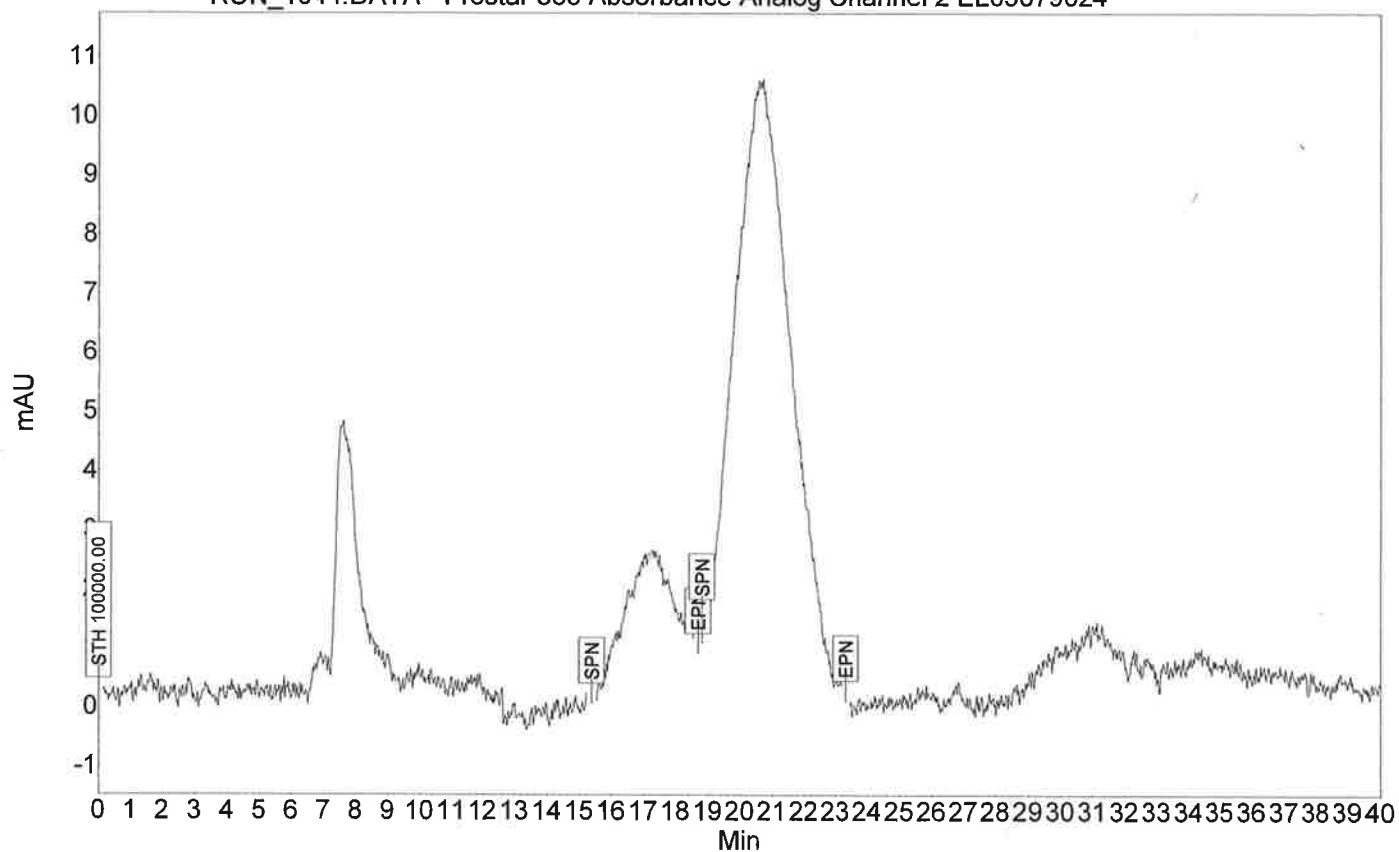

| Index | Name    | Time [Min] | Quantity [% Area] | Height [mAU] | Area [mAU.Min] | Area % [%] |
|-------|---------|------------|-------------------|--------------|----------------|------------|
| 1     | UNKNOWN | 17.25      | 14.43             | 2.1          | 3.4            | 14.426     |
| 2     | UNKNOWN | 20.63      | 85.57             | 9.9          | 20.3           | 85.574     |
| Total |         |            | 100.00            | 12.0         | 23.7           | 100.000    |

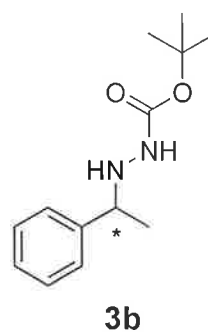

cbz

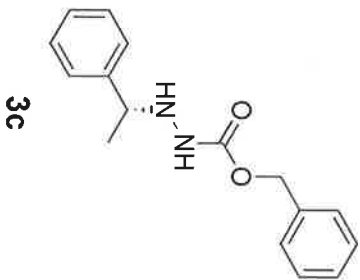

7.350  
7.331  
7.321  
7.283  
7.273  
7.259  
6.128  
5.117  
4.210  
1.555  
1.347  
1.331  
-0.000

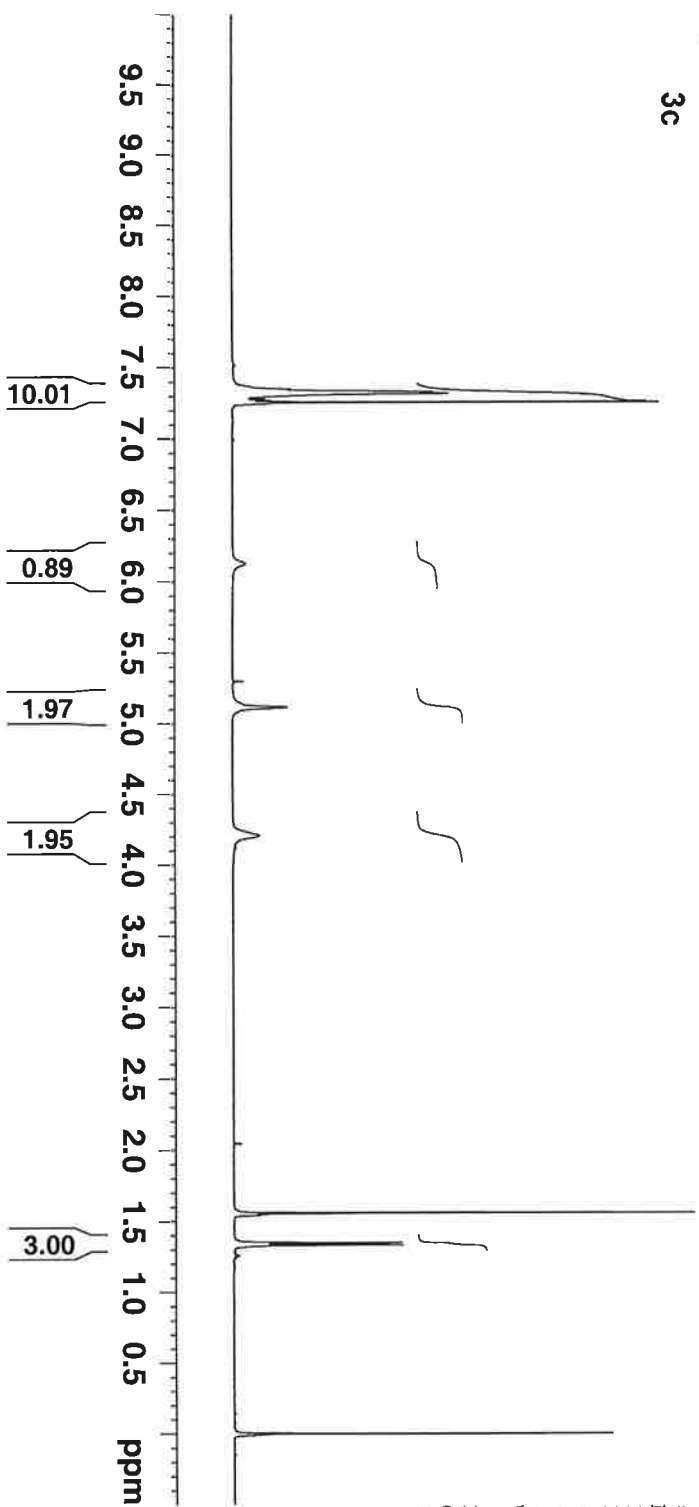

```

NAME      Aug20-2021-sys
EXPNO      40
PROCNO      1
Date_      20210820
Time       15.59
INSTRUM     spect
PROBHD      5 mm PABBO BB-
PULPROG     zg30
TD          65536
SOLVENT     CDCl3
NS          16
DS          2
SWH         8278.146 Hz
FIDRES      0.126314 Hz
AQ          3.9584243 sec
RG          362
DW          60.400 usec
DE          6.50 usec
TE          297.6 K
D1          1.00000000 sec
TD0         1

===== CHANNEL f1 =====
NUC1      1H
P1        11.60 usec
PL1       3.00 dB
SF01      400.1324710 MHz
SI        32768
SF        400.1300099 MHz
WDW        EM
SSB        0
LB        0.30 Hz
GB        0
PC        1.00
  
```

RUN\_1049.DATA - Prostar 335 Absorbance Analog Channel 1 EL05079024

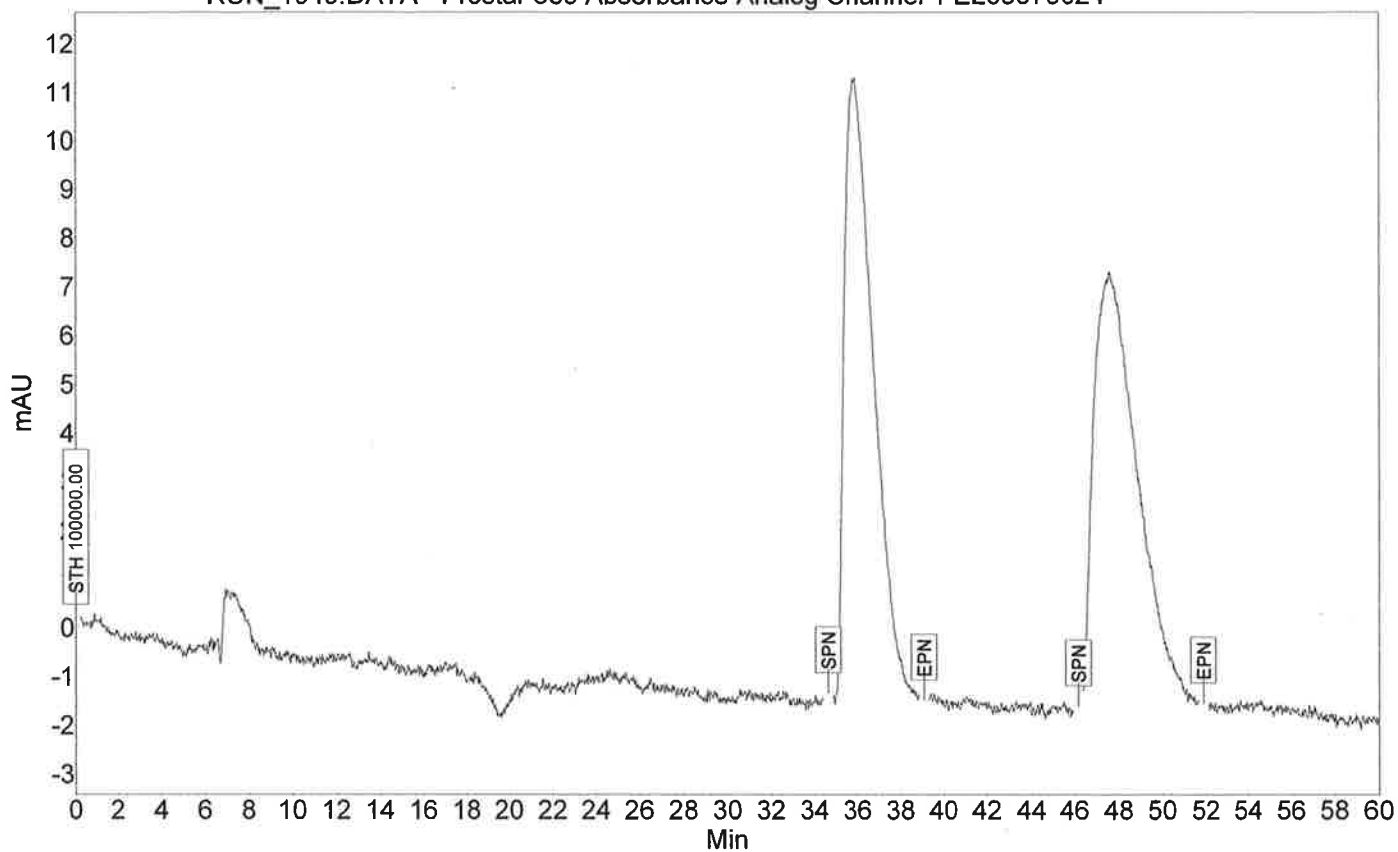

| Index | Name    | Time [Min] | Quantity [% Area] | Height [mAU] | Area [mAU.Min] | Area % [%] |
|-------|---------|------------|-------------------|--------------|----------------|------------|
| 1     | UNKNOWN | 35.77      | 49.24             | 12.7         | 19.9           | 49.243     |
| 2     | UNKNOWN | 47.57      | 50.76             | 9.0          | 20.5           | 50.757     |
| Total |         |            | 100.00            | 21.6         | 40.5           | 100.000    |

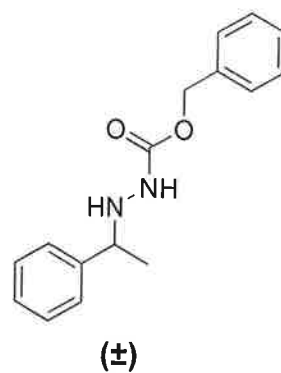

RUN\_1160.DATA - Prostar 335 Absorbance Analog Channel 2 EL05079024

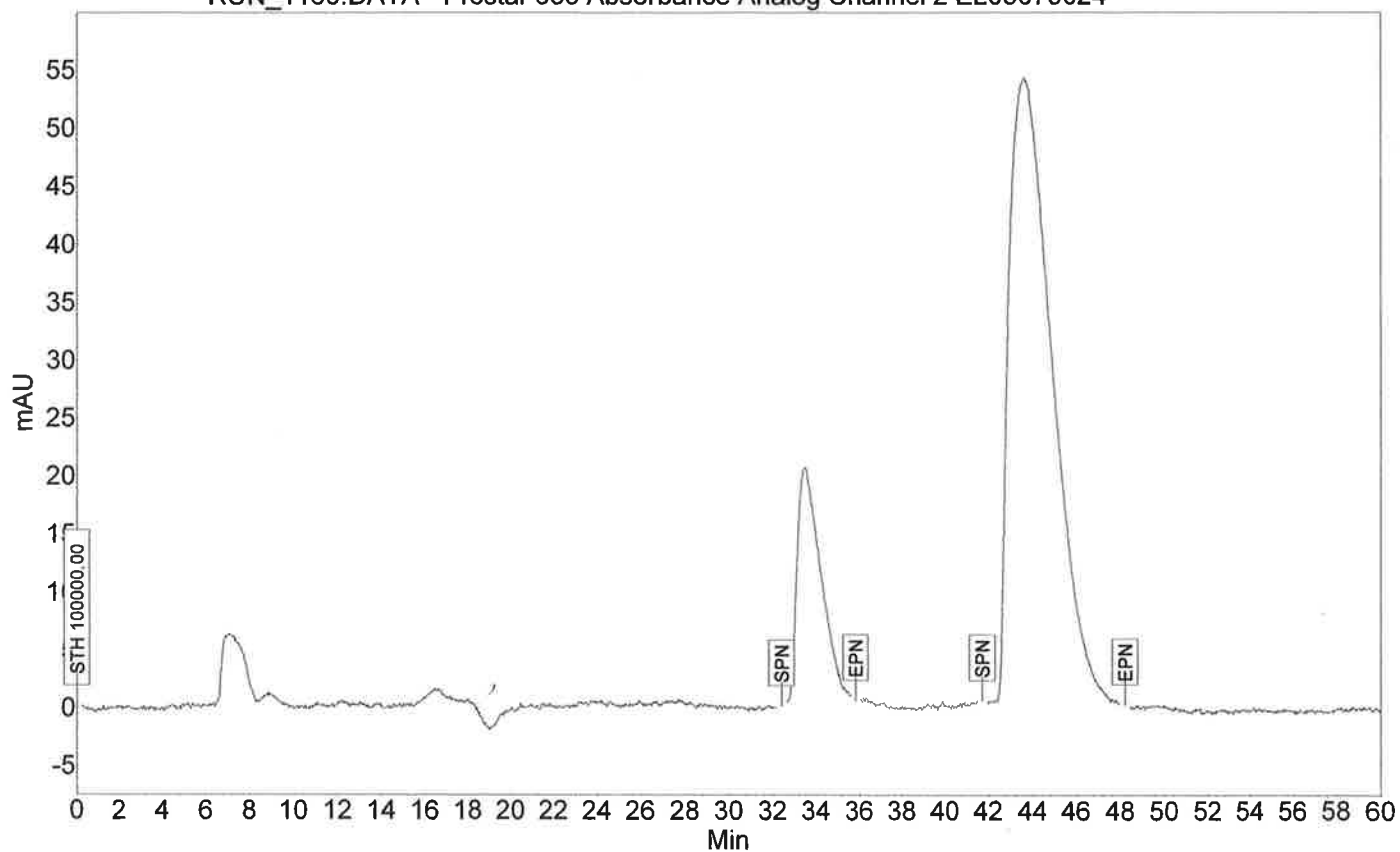

| Index | Name    | Time [Min] | Quantity [% Area] | Height [mAU] | Area [mAU.Min] | Area % [%] |
|-------|---------|------------|-------------------|--------------|----------------|------------|
| 1     | UNKNOWN | 33.45      | 17.87             | 20.4         | 26.6           | 17.867     |
| 2     | UNKNOWN | 43.57      | 82.13             | 53.9         | 122.2          | 82.133     |
| Total |         |            | 100.00            | 74.3         | 148.8          | 100.000    |

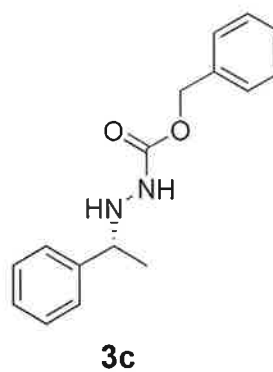

NO2

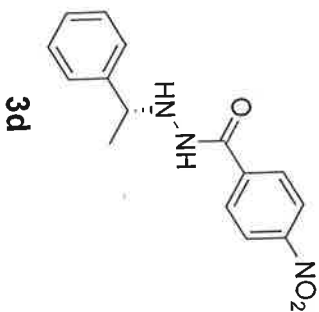

8.250  
8.228  
7.781  
7.759  
7.544  
7.530  
7.410  
7.394  
7.369  
7.349  
7.325  
7.315  
7.309  
7.301  
7.291  
  
5.114  
5.102  
  
4.285  
4.272  
4.256  
4.241  
  
1.610  
1.456  
1.440  
  
0.000

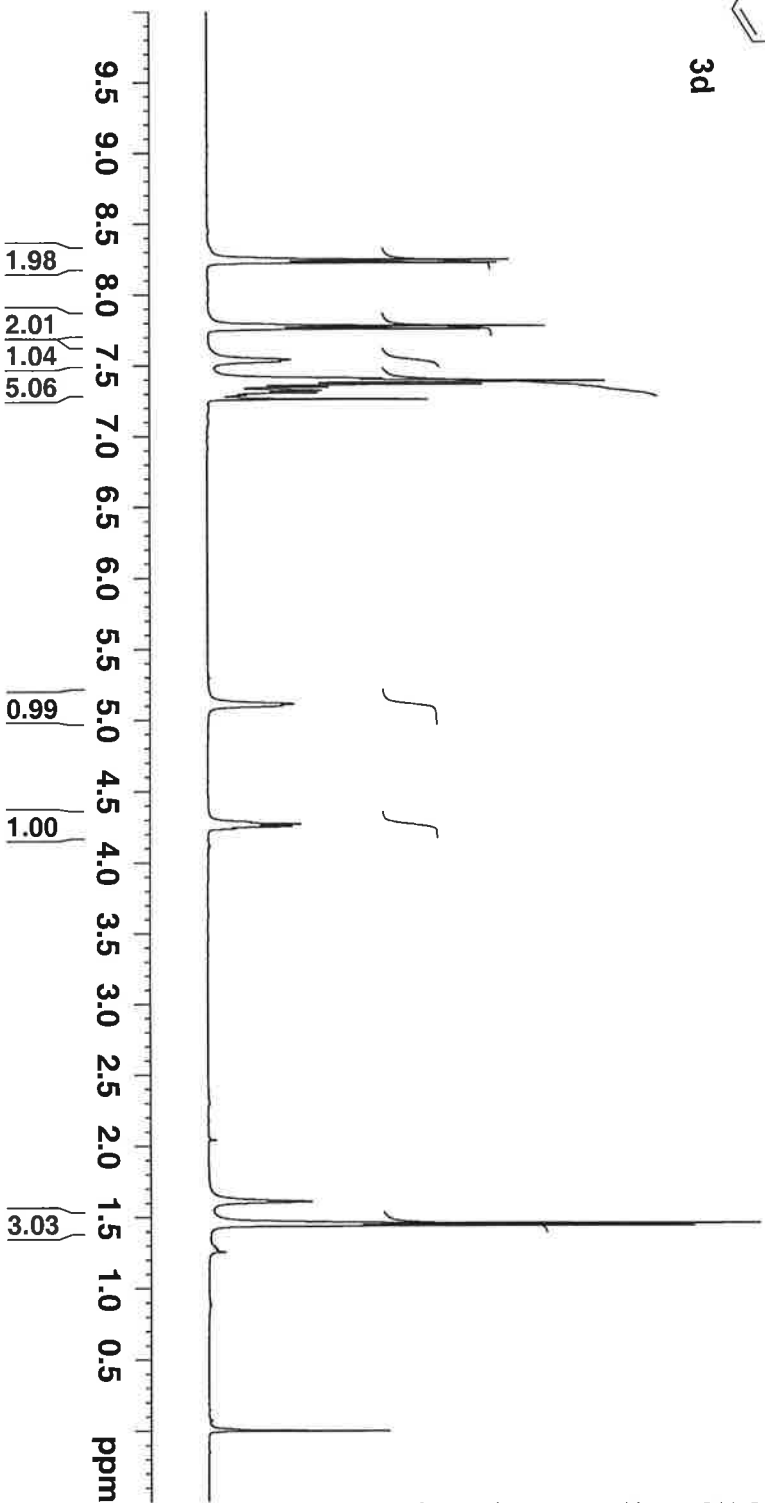

```

NAME                               Aug15-2021-sys
EXPNO                               30
PROCNO                              1
Date_                               20210815
Time_                               16.19
INSTRUM                             spect
PROBHD                               5 mm PABBO BB-
PULPROG                             zg30
TD                                   65536
SOLVENT                             CDCl3
NS                                   16
DS                                   2
SWH                                  8278.146 Hz
FIDRES                              0.126314 Hz
AQ                                   3.9584243 sec
RG                                   256
DW                                   60.400 usec
DE                                   6.50 usec
TE                                   296.3 K
D1                                   1.00000000 sec
TD0                                  1

===== CHANNEL f1 =====
NUC1                                1H
P1                                  11.60 usec
PL1                                  3.00 dB
SFO1                                400.1324710 MHz
SI                                   32768
SF                                   400.1300083 MHz
WDW                                  EM
SSB                                  0
LB                                   0.30 Hz
GB                                   0
PC                                   1.00
  
```

NO2

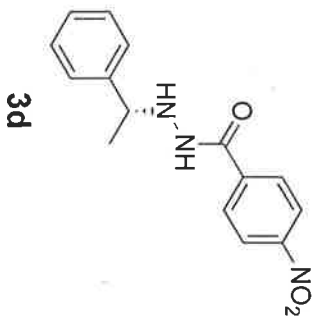

165.24  
149.80  
142.72  
138.48  
128.73  
128.05  
127.82  
127.16  
123.88

77.32  
77.00  
76.68

60.14

21.27

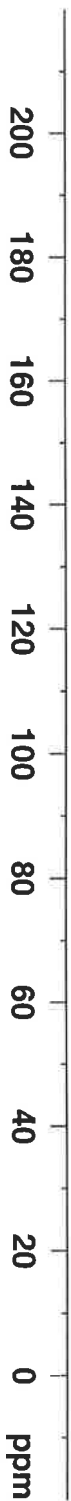

```

NAME                               Aug16-2021-sys
EXPNO                               71
PROCNO                               1
Date_                               20210817
Time                                7.59
INSTRUM                             spect
PROBHD                               5 mm PABBO BB-
PULPROG                             zgpg30
TD                                   65536
SOLVENT                             CDCl3
NS                                   10024
DS                                   4
SWH                                  23980.814 Hz
FIDRES                              0.365918 Hz
AQ                                  1.3664756 sec
RG                                   32768
DE                                  20.850 usec
TE                                   301.6 K
D1                                   2.00000000 sec
D11                                 0.03000000 sec
TD0                                  1

===== CHANNEL f1 =====
NUC1                                  13C
P1                                  14.75 usec
PL1                                  0.00 dB
SFO1                                100.6228298 MHz

===== CHANNEL f2 =====
CPDPRG2                             waltz16
NUC2                                  1H
PCPD2                                80.00 usec
PL2                                  -2.00 dB
PL12                                12.54 dB
PL13                                15.00 dB
SFO2                                400.1316005 MHz
SI                                   32768
SF                                  100.6127688 MHz
WDW                                  EM
SSB                                  0
LB                                  1.00 Hz
GB                                  0
PC                                  1.40
  
```



RUN\_1163.DATA - Prostar 335 Absorbance Analog Channel 1 EL05079024

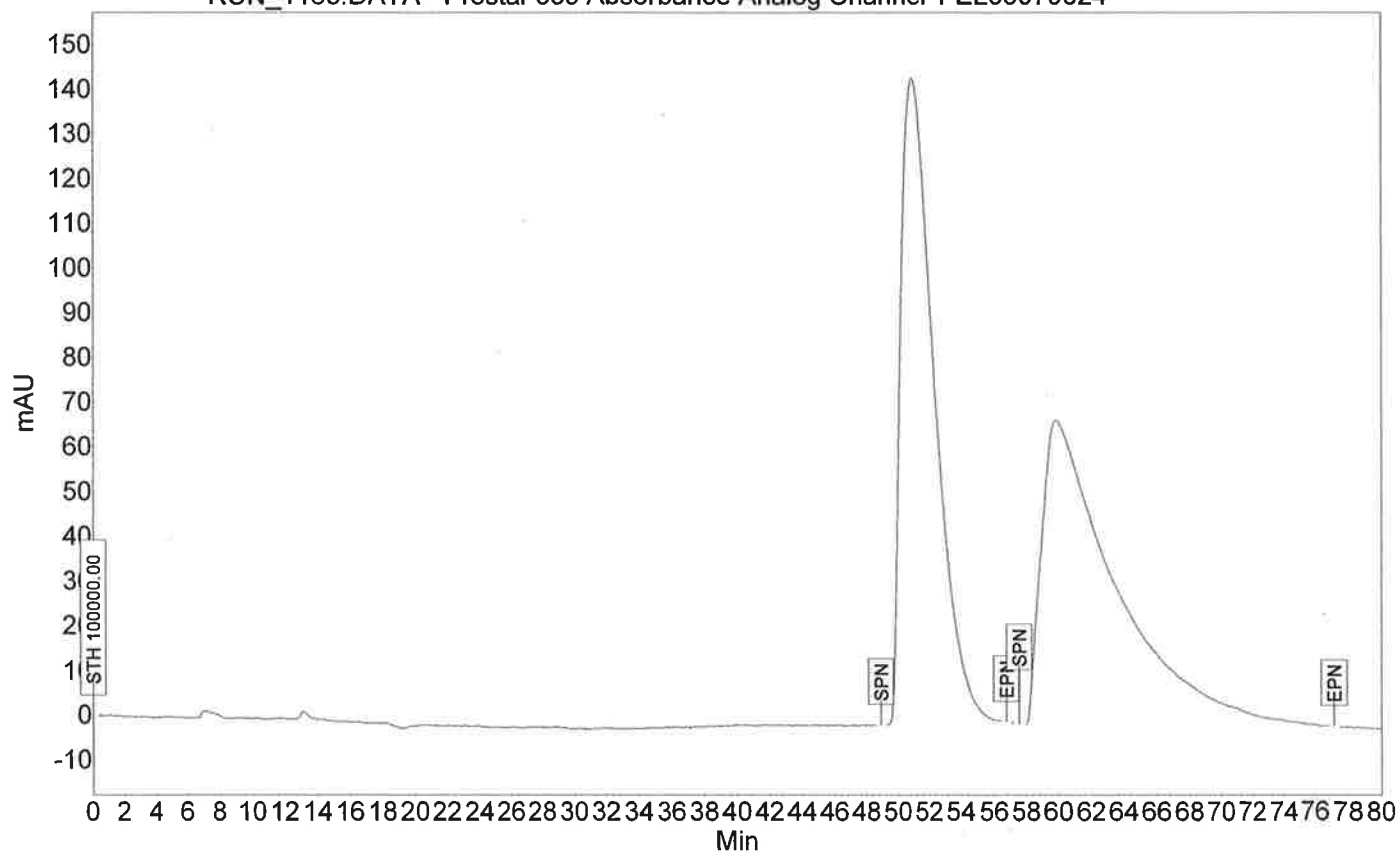

| Index | Name    | Time [Min] | Quantity [% Area] | Height [mAU] | Area [mAU.Min] | Area % [%] |
|-------|---------|------------|-------------------|--------------|----------------|------------|
| 1     | UNKNOWN | 50.85      | 50.34             | 144.5        | 361.9          | 50.341     |
| 2     | UNKNOWN | 59.80      | 49.66             | 68.0         | 357.0          | 49.659     |
|       |         |            |                   |              |                |            |
| Total |         |            | 100.00            | 212.6        | 718.9          | 100.000    |

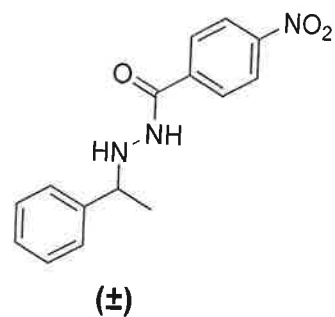

RUN\_1165.DATA - Prostar 335 Absorbance Analog Channel 1 EL05079024

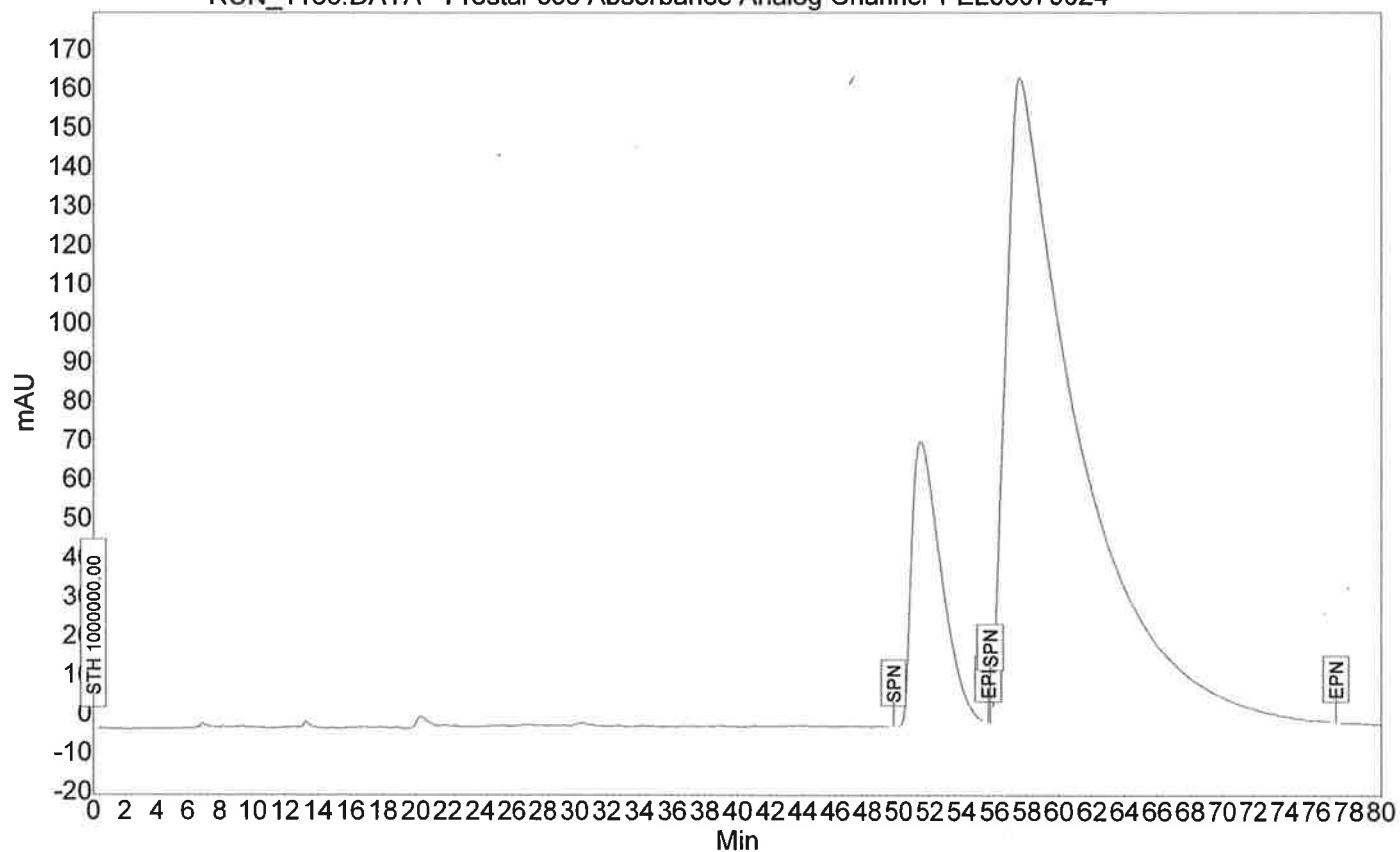

| Index | Name    | Time [Min] | Quantity [% Area] | Height [mAU] | Area [mAU.Min] | Area % [%] |
|-------|---------|------------|-------------------|--------------|----------------|------------|
| 1     | UNKNOWN | 51.44      | 15.72             | 72.6         | 159.7          | 15.720     |
| 2     | UNKNOWN | 57.56      | 84.28             | 165.1        | 856.2          | 84.280     |
|       |         |            |                   |              |                |            |
| Total |         |            | 100.00            | 237.6        | 1015.8         | 100.000    |

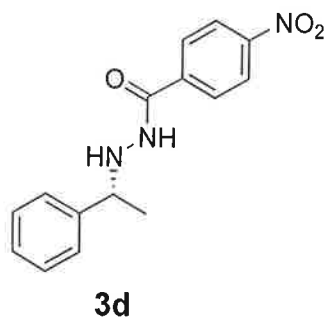

Me

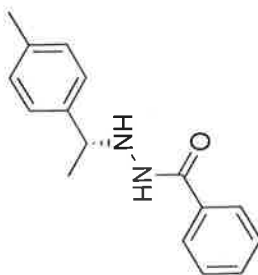

3e

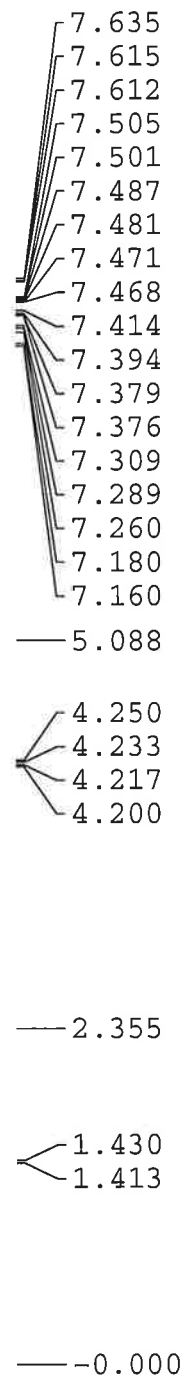

2.05  
1.08  
2.95  
2.01  
1.98

0.79

1.00

3.07

3.08

9.5 9.0 8.5 8.0 7.5 7.0 6.5 6.0 5.5 5.0 4.5 4.0 3.5 3.0 2.5 2.0 1.5 1.0 0.5 ppm

```

NAME      Aug14-2021-sys
EXPNO     60
PROCNO    1
Date_     20210814
Time      16.31
INSTRUM   spect
PROBHD    5 mm PABBO BB-
PULPROG   zg30
TD         65536
SOLVENT   CDCl3
NS         16
DS         2
SWH        8278.146 Hz
FIDRES     0.126314 Hz
AQ         3.9584243 sec
RG         362
DW         60.400 usec
DE         6.50 usec
TE         296.2 K
D1         1.00000000 sec
TD0        1

===== CHANNEL f1 =====
NUC1       1H
P1         11.60 usec
PL1        3.00 dB
SFO1       400.1324710 MHz
SI         32768
SF         400.1300089 MHz
WDW        EM
SSB        0
LB         0.30 Hz
GB         0
PC         1.00
  
```

# RUN\_1157.DATA - Prostar 335 Absorbance Analog Channel 1 EL05079024

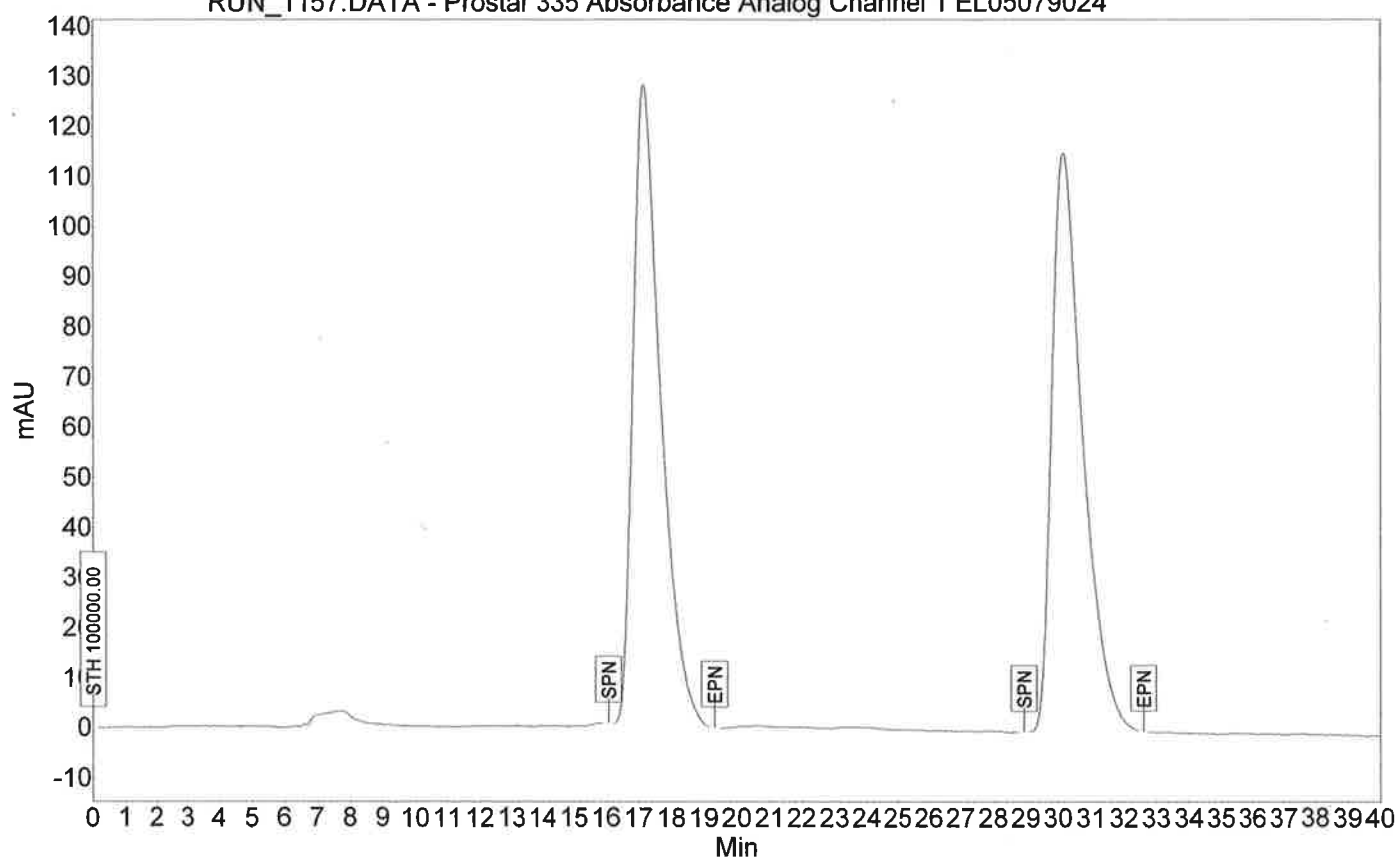

| Index | Name    | Time [Min] | Quantity [% Area] | Height [mAU] | Area [mAU.Min] | Area % [%] |
|-------|---------|------------|-------------------|--------------|----------------|------------|
| 1     | UNKNOWN | 17.15      | 49.95             | 127.7        | 126.4          | 49.947     |
| 2     | UNKNOWN | 30.15      | 50.05             | 115.5        | 126.7          | 50.053     |
|       |         |            |                   |              |                |            |
| Total |         |            | 100.00            | 243.2        | 253.1          | 100.000    |

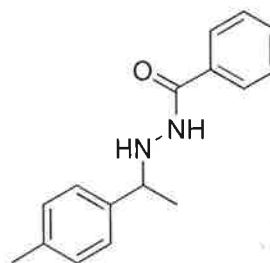

(±)

RUN\_1156.DATA - Prostar 335 Absorbance Analog Channel 1 EL05079024

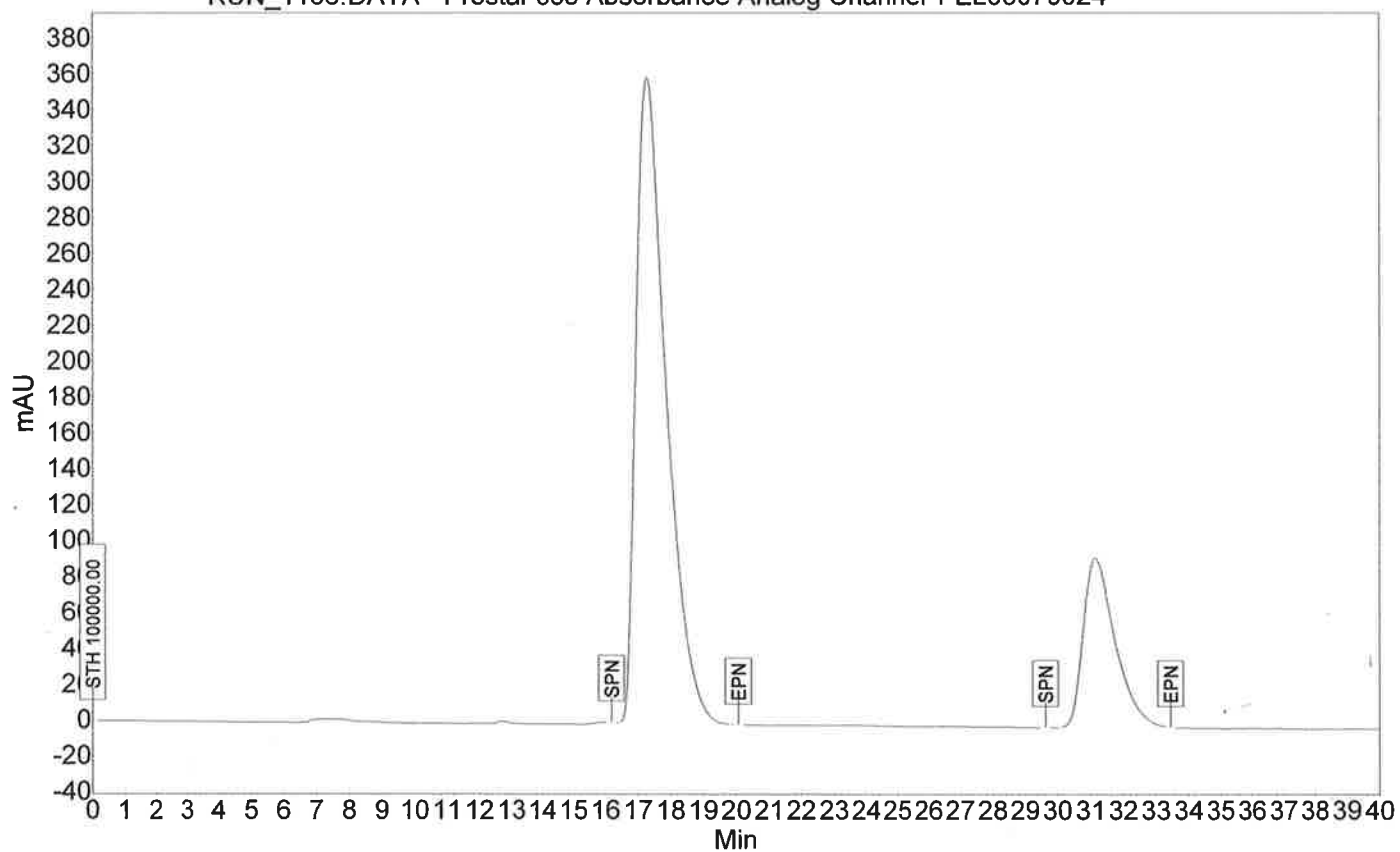

| Index | Name    | Time [Min] | Quantity [% Area] | Height [mAU] | Area [mAU.Min] | Area % [%] |
|-------|---------|------------|-------------------|--------------|----------------|------------|
| 1     | UNKNOWN | 17.27      | 78.64             | 359.4        | 388.6          | 78.642     |
| 2     | UNKNOWN | 31.13      | 21.36             | 94.1         | 105.5          | 21.358     |
| Total |         |            | 100.00            | 453.5        | 494.2          | 100.000    |

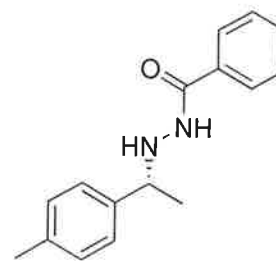

3e

3Me

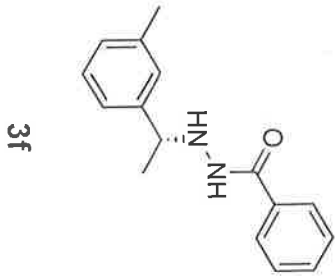

3f

7.639  
7.621  
7.506  
7.488  
7.469  
7.414  
7.394  
7.376  
7.260  
7.248  
7.229  
7.224  
7.207  
7.188  
7.118  
7.100  
— 5.095  
4.243  
4.227  
4.210  
4.194  
— 2.361  
1.434  
1.417  
— 0.000

9.5 9.0 8.5 8.0 7.5 7.0 6.5 6.0 5.5 5.0 4.5 4.0 3.5 3.0 2.5 2.0 1.5 1.0 0.5 ppm

2.02  
4.01  
3.89  
0.99

0.84

1.00

3.08

3.07

NAME Aug13-2021-cxu  
EXPNO 1  
PROCNO 1  
Date\_ 20210813  
Time 12.26  
INSTRUM spect  
PROBHD 5 mm TBI 1H/31  
PULPROG zg30  
TD 65536  
SOLVENT CDCl3  
NS 16  
DS 2  
SWH 8278.146 Hz  
FIDRES 0.126314 Hz  
AQ 3.9584243 sec  
RG 13004  
DW 60.400 usec  
DE 6.50 usec  
TE 300.0 K  
D1 1.00000000 sec  
TD0 1

===== CHANNEL f1 =====  
NUC1 1H  
P1 18.75 usec  
PL1 0.50 dB  
SFO1 400.1324710 MHz  
SI 32768  
SF 400.1300095 MHz  
WDW EM  
SSB 0  
LB 0.30 Hz  
GB 0  
PC 1.00

RUN\_1167.DATA - Prostar 335 Absorbance Analog Channel 1 EL05079024

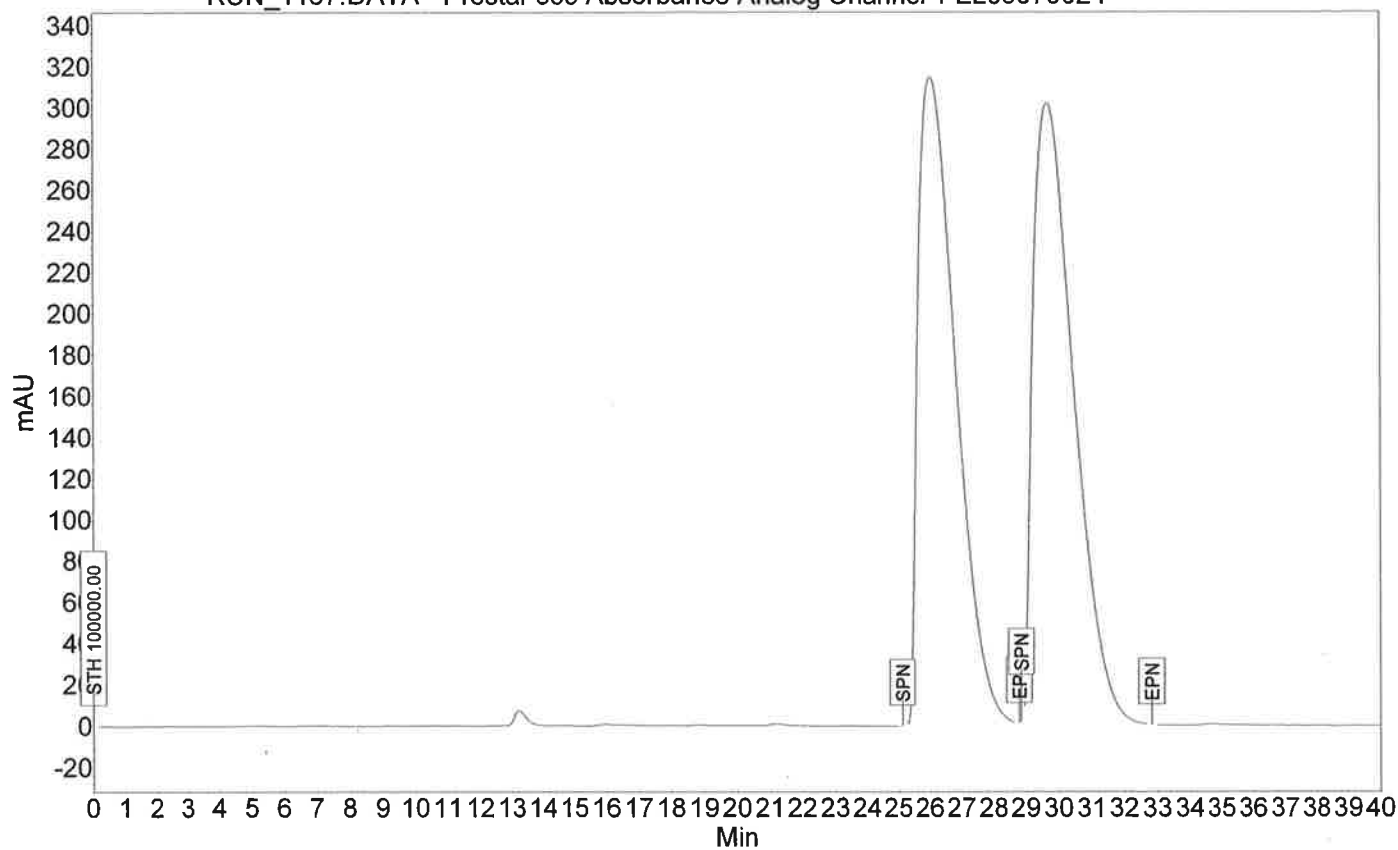

| Index | Name    | Time [Min] | Quantity [% Area] | Height [mAU] | Area [mAU.Min] | Area % [%] |
|-------|---------|------------|-------------------|--------------|----------------|------------|
| 1     | UNKNOWN | 26.03      | 49.93             | 314.4        | 432.1          | 49.932     |
| 2     | UNKNOWN | 29.65      | 50.07             | 300.9        | 433.3          | 50.068     |
| Total |         |            | 100.00            | 615.3        | 865.5          | 100.000    |

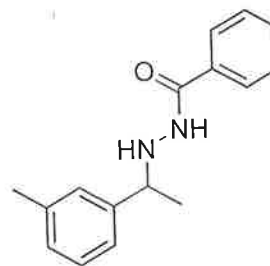

(±)

RUN\_1169.DATA - Prostar 335 Absorbance Analog Channel 1 EL05079024

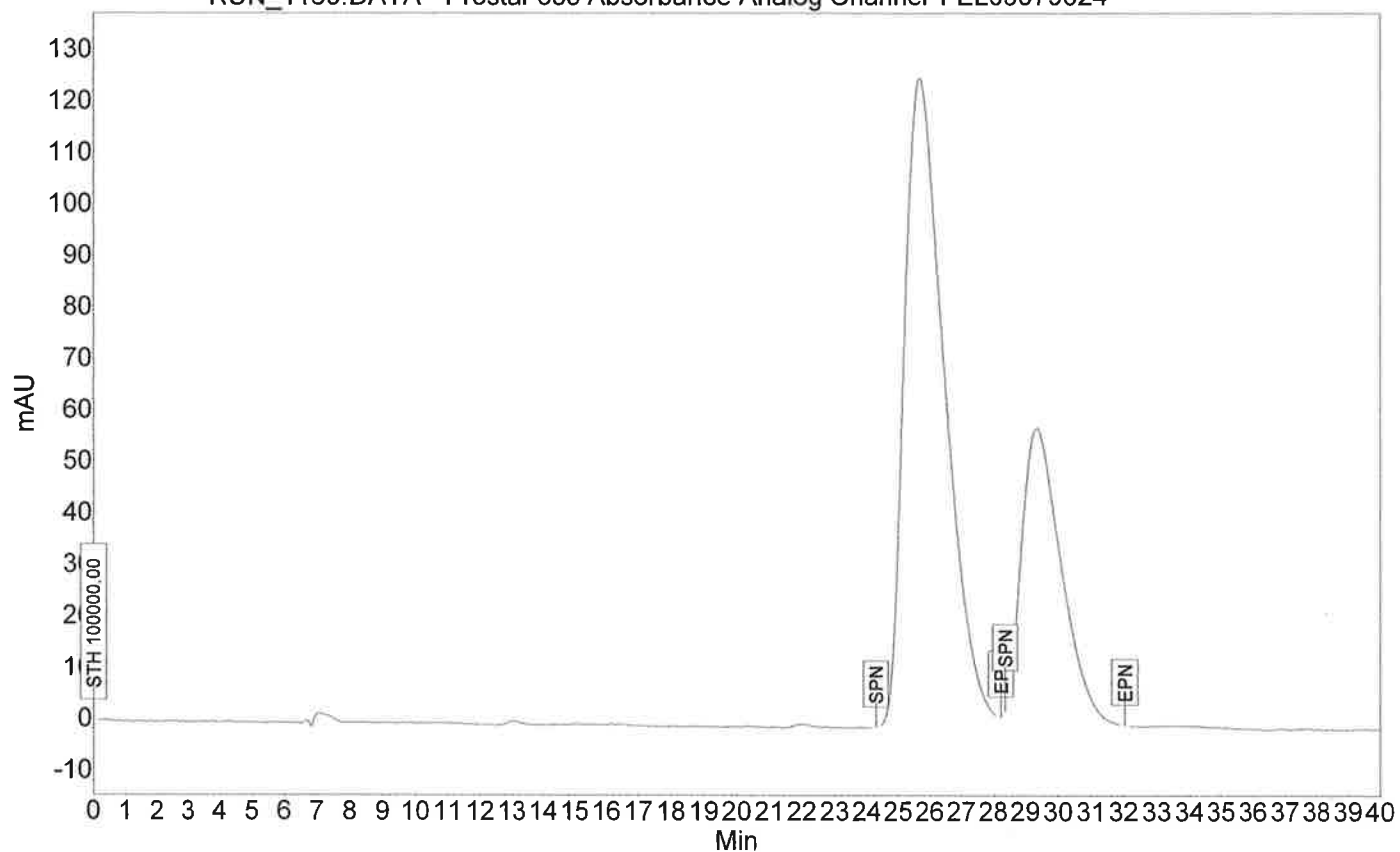

| Index | Name    | Time [Min] | Quantity [% Area] | Height [mAU] | Area [mAU.Min] | Area % [%] |
|-------|---------|------------|-------------------|--------------|----------------|------------|
| 1     | UNKNOWN | 25.65      | 70.37             | 125.4        | 184.4          | 70.373     |
| 2     | UNKNOWN | 29.36      | 29.63             | 56.2         | 77.6           | 29.627     |
| Total |         |            | 100.00            | 181.6        | 262.0          | 100.000    |

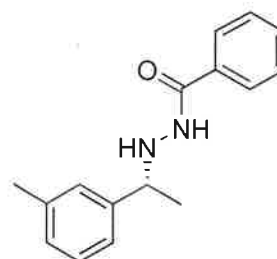

3f



MeO

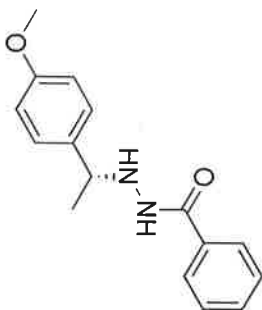

3h

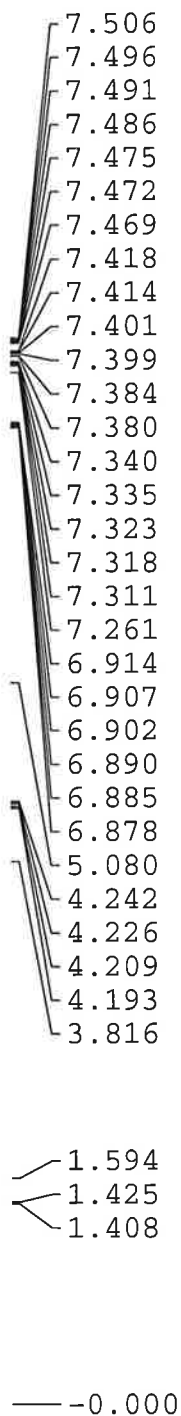

NAME Aug14-2021-sys  
EXPNO 50  
PROCNO 1  
Date\_ 20210814  
Time\_ 16.21  
INSTRUM spect  
PROBHD 5 mm PABBO BB-  
PULPROG zg30  
TD 65536  
SOLVENT CDCl3  
NS 16  
DS 2  
SWH 8278.146 Hz  
FIDRES 0.126314 Hz  
AQ 3.9584243 sec  
RG 362  
DW 60.400 usec  
DE 6.50 usec  
TE 296.2 K  
D1 1.0000000 sec  
TD0 1

===== CHANNEL f1 =====  
NUC1 1H  
P1 11.60 usec  
PL1 3.00 dB  
SFO1 400.1324710 MHz  
SI 32768  
SF 400.1300089 MHz  
WDW EM  
SSB 0  
LB 0.30 Hz  
GB 0  
PC 1.00

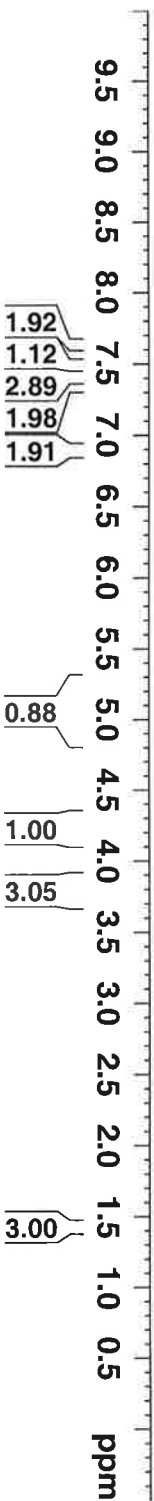

RUN\_1146.DATA - Prostar 335 Absorbance Analog Channel 1 EL05079024

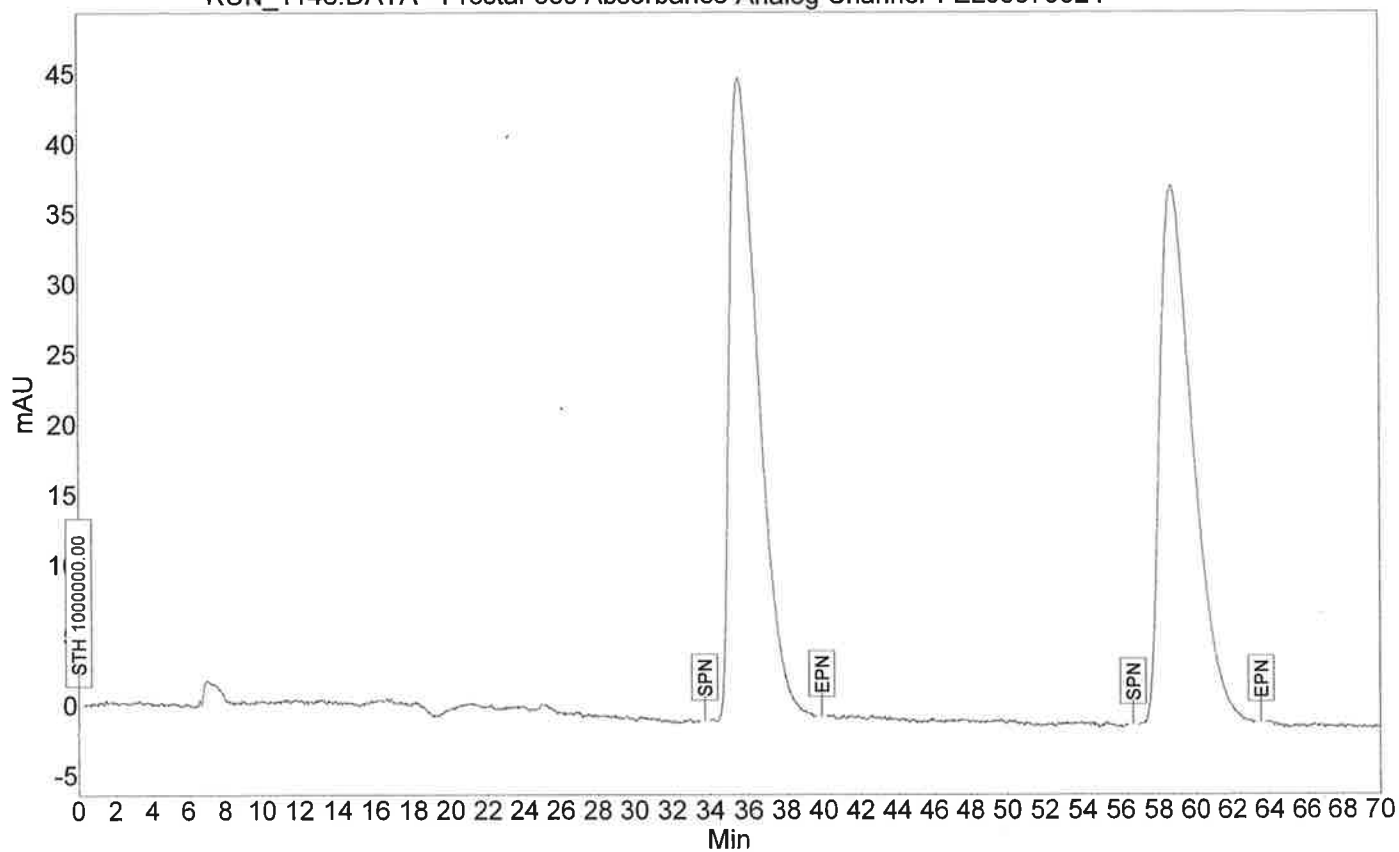

| Index | Name    | Time [Min] | Quantity [% Area] | Height [mAU] | Area [mAU.Min] | Area % [%] |
|-------|---------|------------|-------------------|--------------|----------------|------------|
| 1     | UNKNOWN | 35.53      | 50.13             | 45.7         | 79.2           | 50.135     |
| 2     | UNKNOWN | 58.68      | 49.87             | 38.4         | 78.7           | 49.865     |
| Total |         |            | 100.00            | 84.2         | 157.9          | 100.000    |

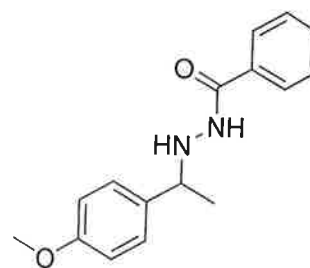

(±)

RUN\_1147.DATA - Prostar 335 Absorbance Analog Channel 1 EL05079024

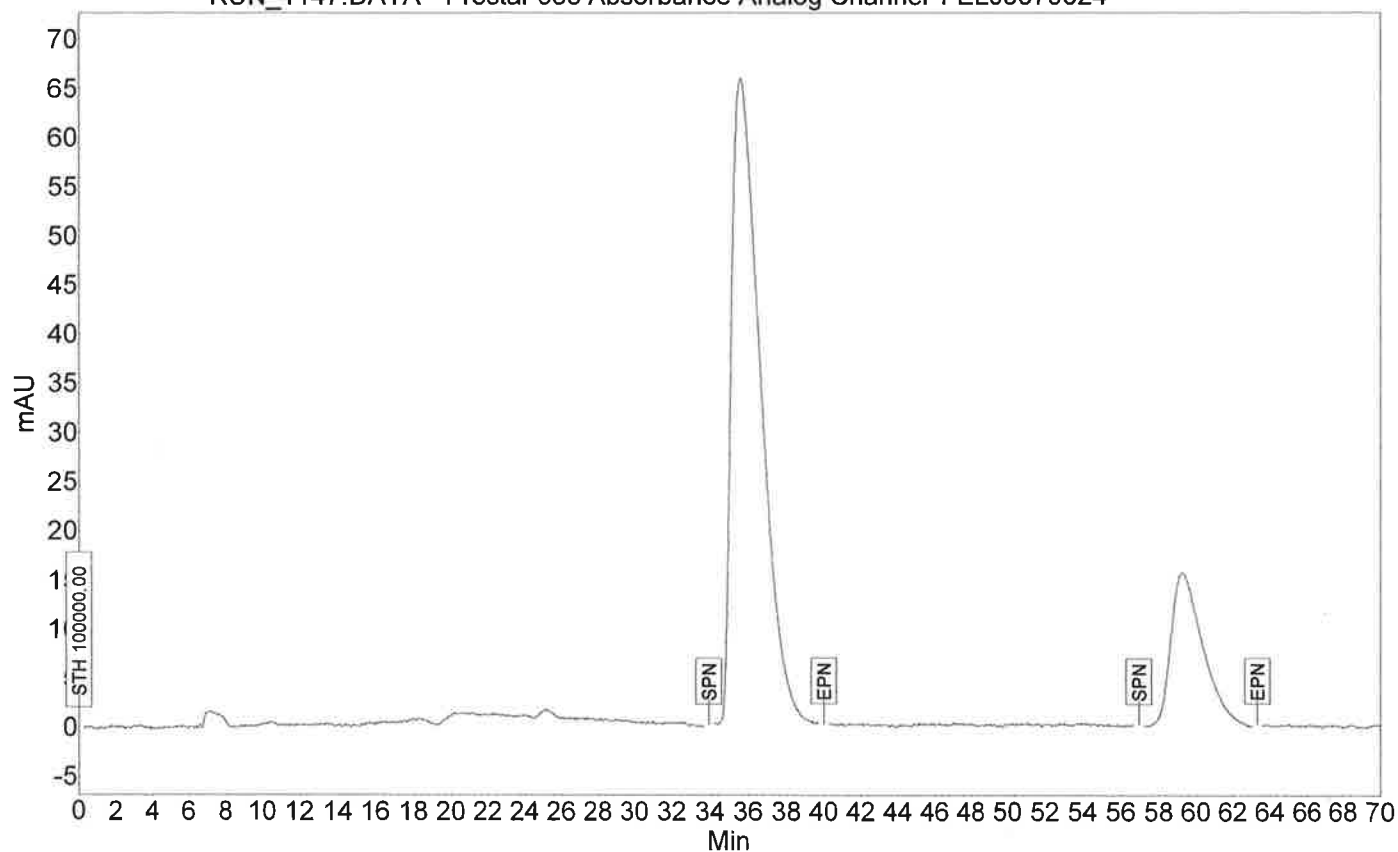

| Index | Name    | Time [Min] | Quantity [% Area] | Height [mAU] | Area [mAU.Min] | Area % [%] |
|-------|---------|------------|-------------------|--------------|----------------|------------|
| 1     | UNKNOWN | 35.59      | 79.13             | 65.8         | 115.7          | 79.133     |
| 2     | UNKNOWN | 59.24      | 20.87             | 15.4         | 30.5           | 20.867     |
| Total |         |            | 100.00            | 81.2         | 146.2          | 100.000    |

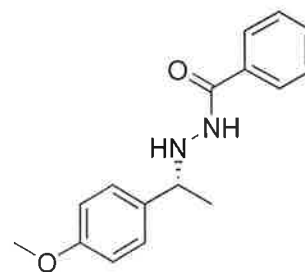

3h

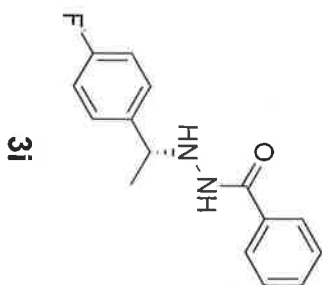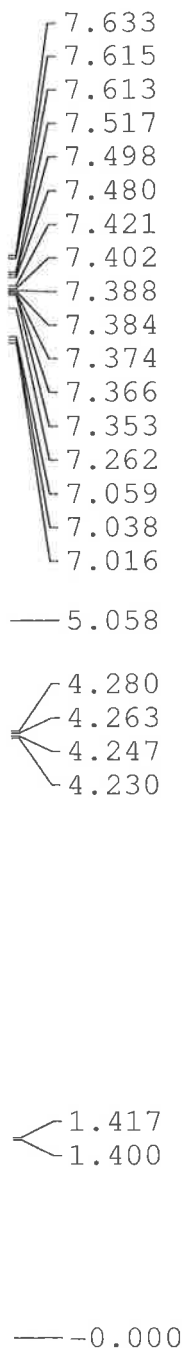

```

NAME      Aug11-2021
EXPNO     10
PROCNO    1
Date_     20210811
Time      17.23
INSTRUM   spect
PROBHD    5 mm TBI 1H/31
PULPROG   zg30
TD         65536
SOLVENT   CDCl3
NS         16
DS         2
SWH        8278.146 Hz
FIDRES     0.126314 Hz
AQ         3.9584243 sec
RG         13004
DW         60.400 usec
DE         6.50 usec
TE         300.0 K
D1         1.00000000 sec
TD0        1

===== CHANNEL f1 =====
NUC1       1H
P1         18.75 usec
PL1        0.50 dB
SFO1       400.1324710 MHz
SI         32768
SF         400.1300088 MHz
WDW        EM
SSB        0
LB         0.30 Hz
GB         0
PC         1.00
  
```

9.5 9.0 8.5 8.0 7.5 7.0 6.5 6.0 5.5 5.0 4.5 4.0 3.5 3.0 2.5 2.0 1.5 1.0 0.5 ppm

RUN\_1148.DATA - Prostar 335 Absorbance Analog Channel 1 EL05079024

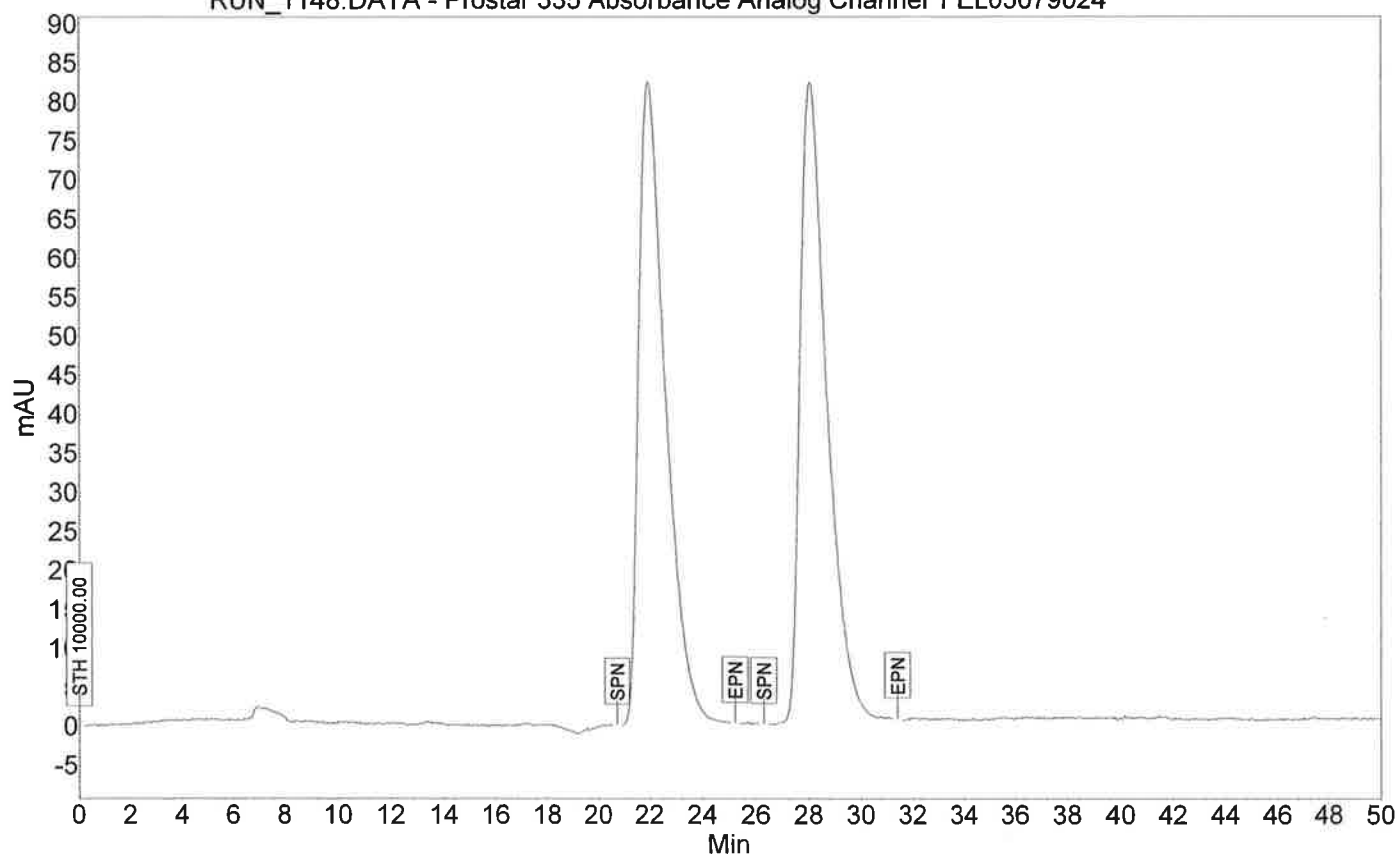

| Index | Name    | Time [Min] | Quantity [% Area] | Height [mAU] | Area [mAU.Min] | Area % [%] |
|-------|---------|------------|-------------------|--------------|----------------|------------|
| 1     | UNKNOWN | 21.93      | 49.98             | 82.2         | 97.8           | 49.982     |
| 2     | UNKNOWN | 28.03      | 50.02             | 81.9         | 97.9           | 50.018     |
| Total |         |            | 100.00            | 164.1        | 195.7          | 100.000    |

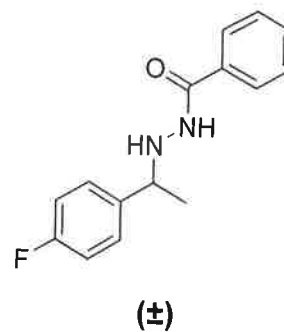

RUN\_1149.DATA - Prostar 335 Absorbance Analog Channel 1 EL05079024

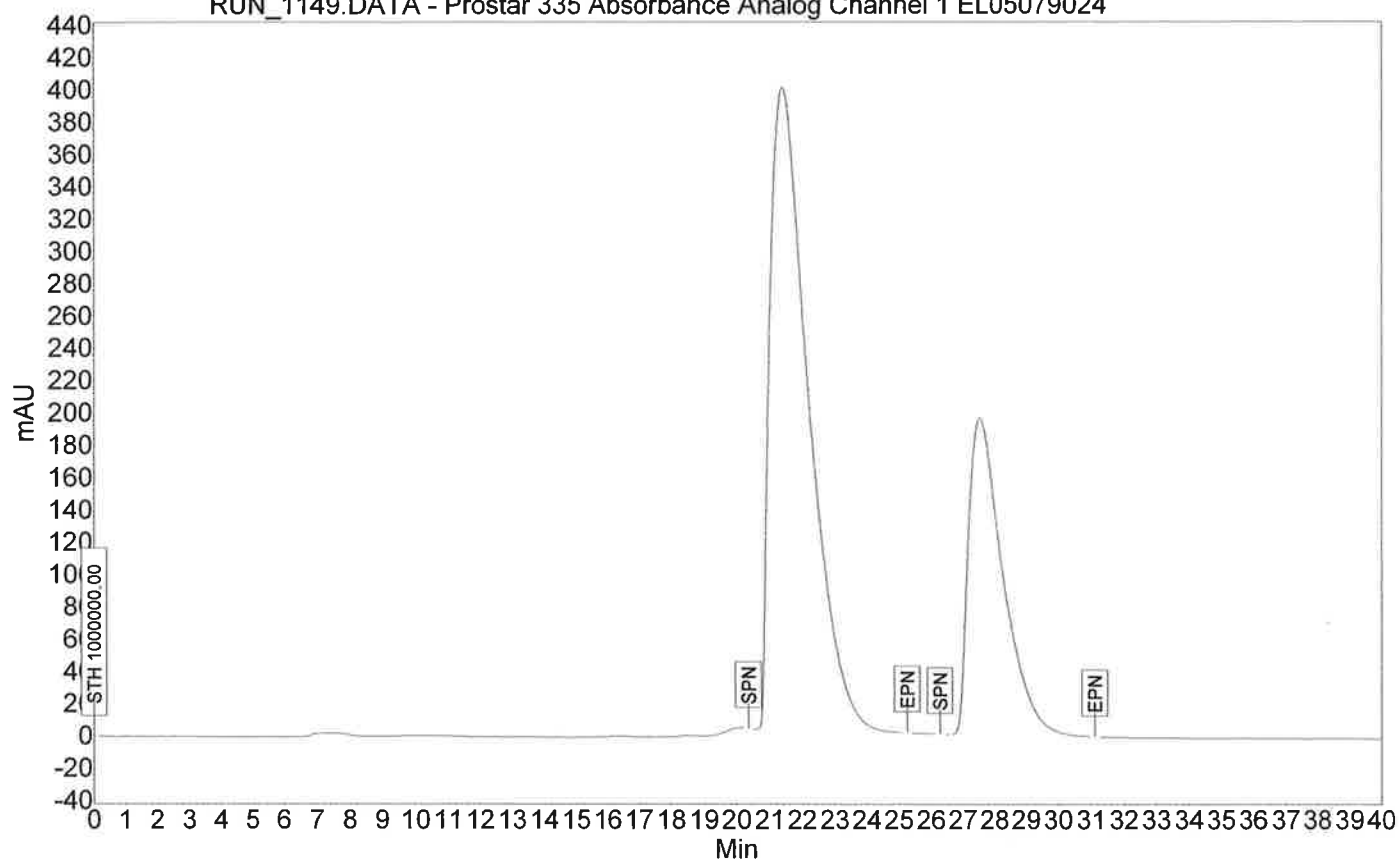

| Index | Name    | Time [Min] | Quantity [% Area] | Height [mAU] | Area [mAU.Min] | Area % [%] |
|-------|---------|------------|-------------------|--------------|----------------|------------|
| 1     | UNKNOWN | 21.37      | 68.67             | 397.3        | 545.0          | 68.674     |
| 2     | UNKNOWN | 27.53      | 31.33             | 196.0        | 248.6          | 31.326     |
| Total |         |            | 100.00            | 593.4        | 793.6          | 100.000    |

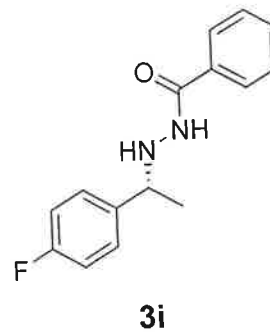

Cl

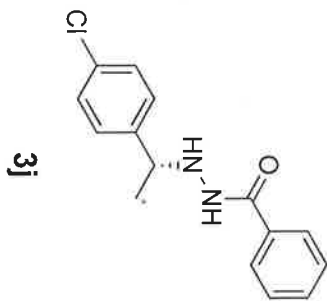

7.630  
7.612  
7.518  
7.499  
7.481  
7.422  
7.403  
7.384  
7.361  
7.339  
7.333  
7.317  
7.311  
7.293  
7.261

5.056  
5.044  
4.273  
4.261  
4.257  
4.245  
4.241  
4.229

1.584  
1.413  
1.397

0.000

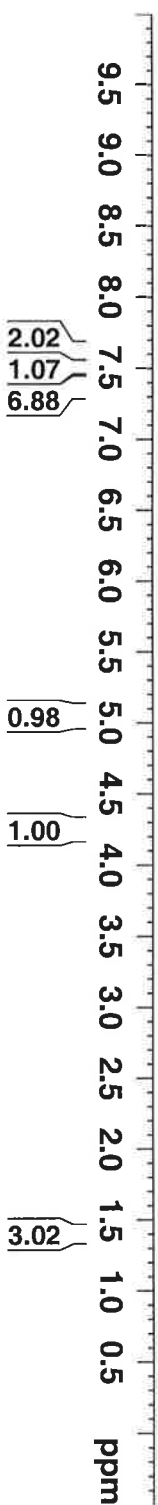

```

NAME                               Aug14-2021-sys
EXPNO                               40
PROCNO                              1
Date_                               20210814
Time                                16.09
INSTRUM                             spect
PROBHD                               5 mm PABBO BB-
PULPROG                             zg30
TD                                   65536
SOLVENT                             CDCl3
NS                                   16
DS                                   2
SWH                                  8278.146 Hz
FIDRES                              0.126314 Hz
AQ                                   3.9584243 sec
RG                                   322.5
DW                                   60.400 usec
DE                                   6.50 usec
TE                                   296.1 K
D1                                   1.00000000 sec
TD0                                  1

===== CHANNEL f1 =====
NUC1                                1H
P1                                  11.60 usec
PL1                                 3.00 dB
SFO1                              400.1324710 MHz
SI                                  32768
SF                                  400.1300095 MHz
WDW                                 EM
SSB                                 0
LB                                  0.30 Hz
GB                                  0
PC                                  1.00
  
```

RUN\_1164.DATA - Prostar 335 Absorbance Analog Channel 1 EL05079024

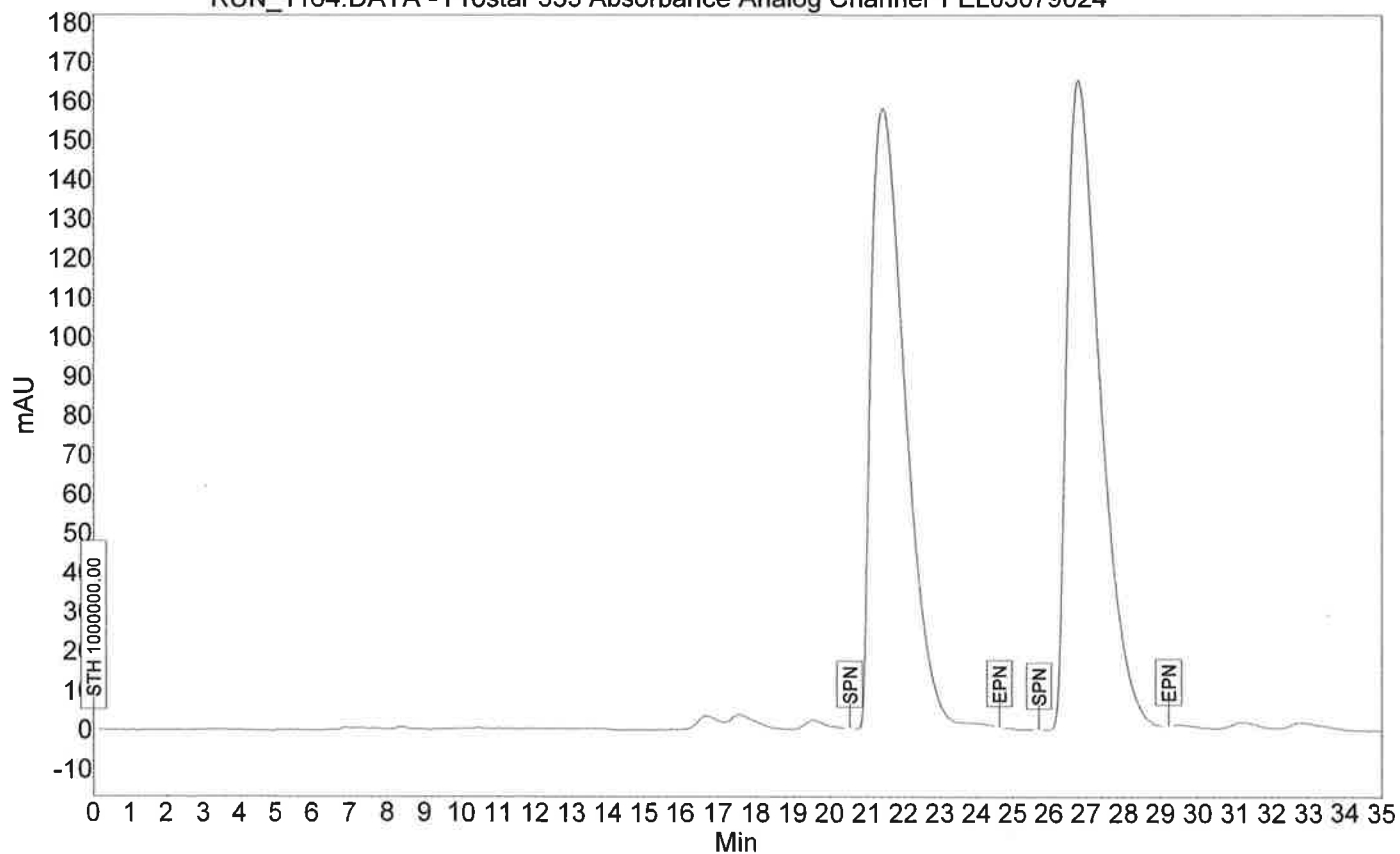

| Index | Name    | Time [Min] | Quantity [% Area] | Height [mAU] | Area [mAU.Min] | Area % [%] |
|-------|---------|------------|-------------------|--------------|----------------|------------|
| 1     | UNKNOWN | 21.43      | 49.98             | 157.6        | 169.2          | 49.977     |
| 2     | UNKNOWN | 26.77      | 50.02             | 165.0        | 169.3          | 50.023     |
| Total |         |            | 100.00            | 322.6        | 338.5          | 100.000    |

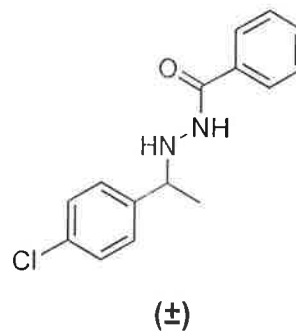



RUN\_1151.DATA - Prostar 335 Absorbance Analog Channel 1 EL05079024

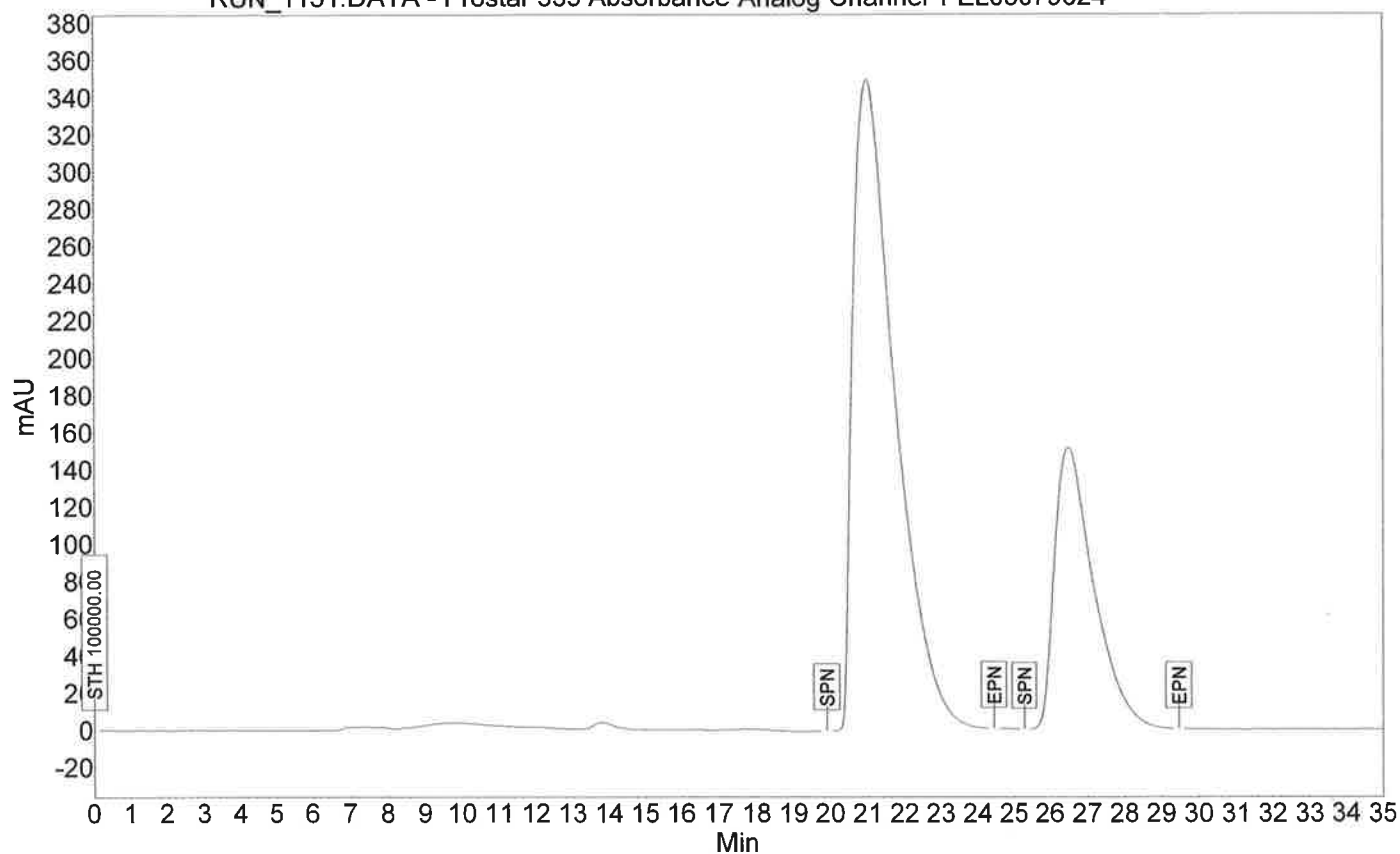

| Index | Name    | Time [Min] | Quantity [% Area] | Height [mAU] | Area [mAU.Min] | Area % [%] |
|-------|---------|------------|-------------------|--------------|----------------|------------|
| 1     | UNKNOWN | 20.97      | 71.50             | 349.3        | 459.2          | 71.503     |
| 2     | UNKNOWN | 26.49      | 28.50             | 151.1        | 183.0          | 28.497     |
| Total |         |            | 100.00            | 500.4        | 642.2          | 100.000    |

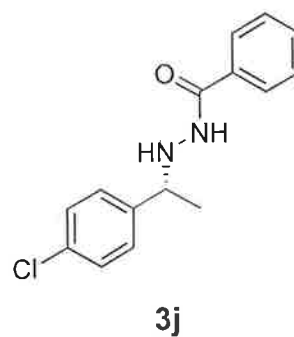

Br

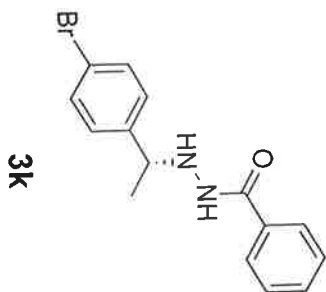

7.631  
7.612  
7.518  
7.500  
7.492  
7.487  
7.481  
7.471  
7.424  
7.405  
7.386  
7.300  
7.279  
7.261

5.058

4.264  
4.248  
4.232  
4.216

1.583  
1.411  
1.395

0.000

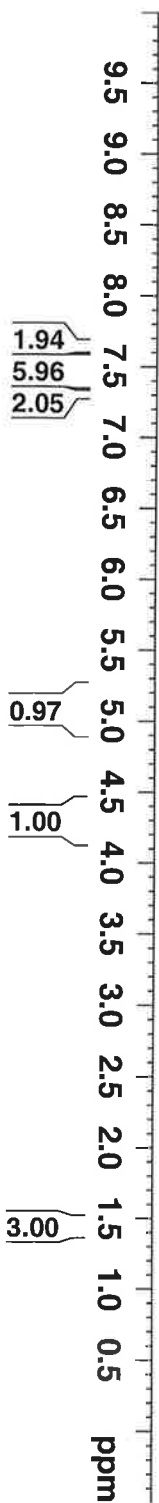

```

NAME      Aug16-2021-sys
EXPNO     30
PROCNO    1
Date_     20210816
Time      16.55
INSTRUM   spect
PROBHD    5 mm PABBO BB-
PULPROG   zg30
TD         65536
SOLVENT   CDCl3
NS         16
DS         2
SWH        8278.146 Hz
FIDRES     0.126314 Hz
AQ         3.9584243 sec
RG         362
DW         60.400 usec
DE         6.50 usec
TE         296.3 K
D1         1.00000000 sec
TD0        1

===== CHANNEL f1 =====
NUC1       1H
P1         11.60 usec
PL1        3.00 dB
SFO1       400.1324710 MHz
SI         32768
SF         400.1300086 MHz
WDW        EM
SSB        0
LB         0.30 Hz
GB         0
PC         1.00
  
```

RUN\_1162.DATA - Prostar 335 Absorbance Analog Channel 1 EL05079024

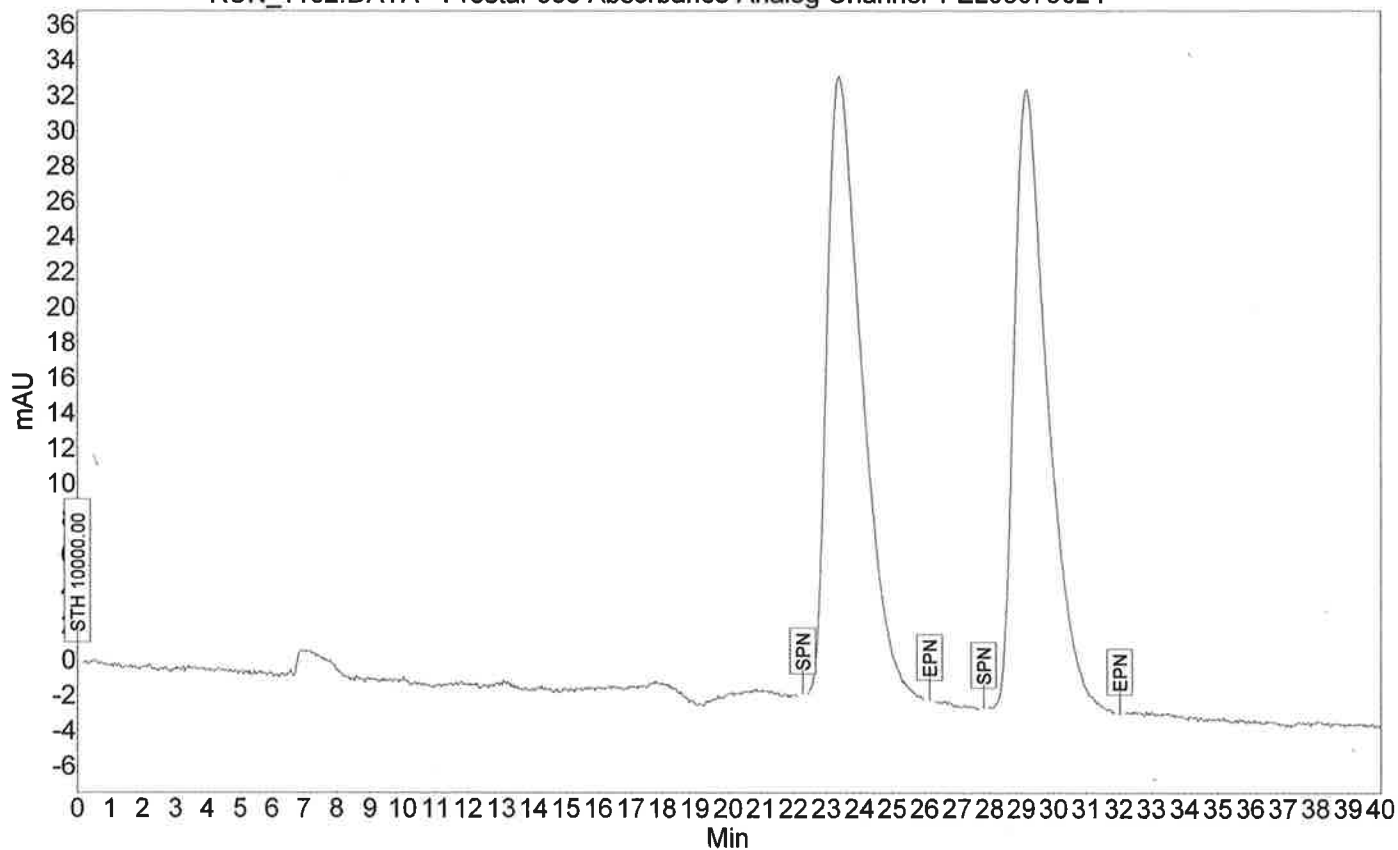

| Index | Name    | Time [Min] | Quantity [% Area] | Height [mAU] | Area [mAU.Min] | Area % [%] |
|-------|---------|------------|-------------------|--------------|----------------|------------|
| 1     | UNKNOWN | 23.39      | 49.80             | 35.1         | 42.9           | 49.801     |
| 2     | UNKNOWN | 29.15      | 50.20             | 35.1         | 43.2           | 50.199     |
| Total |         |            | 100.00            | 70.2         | 86.1           | 100.000    |

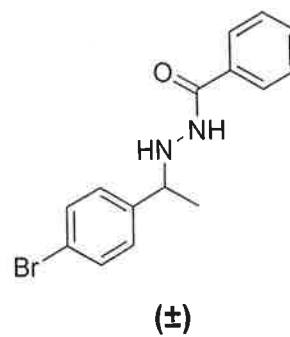

RUN\_1143.DATA - Prostar 335 Absorbance Analog Channel 1 EL05079024

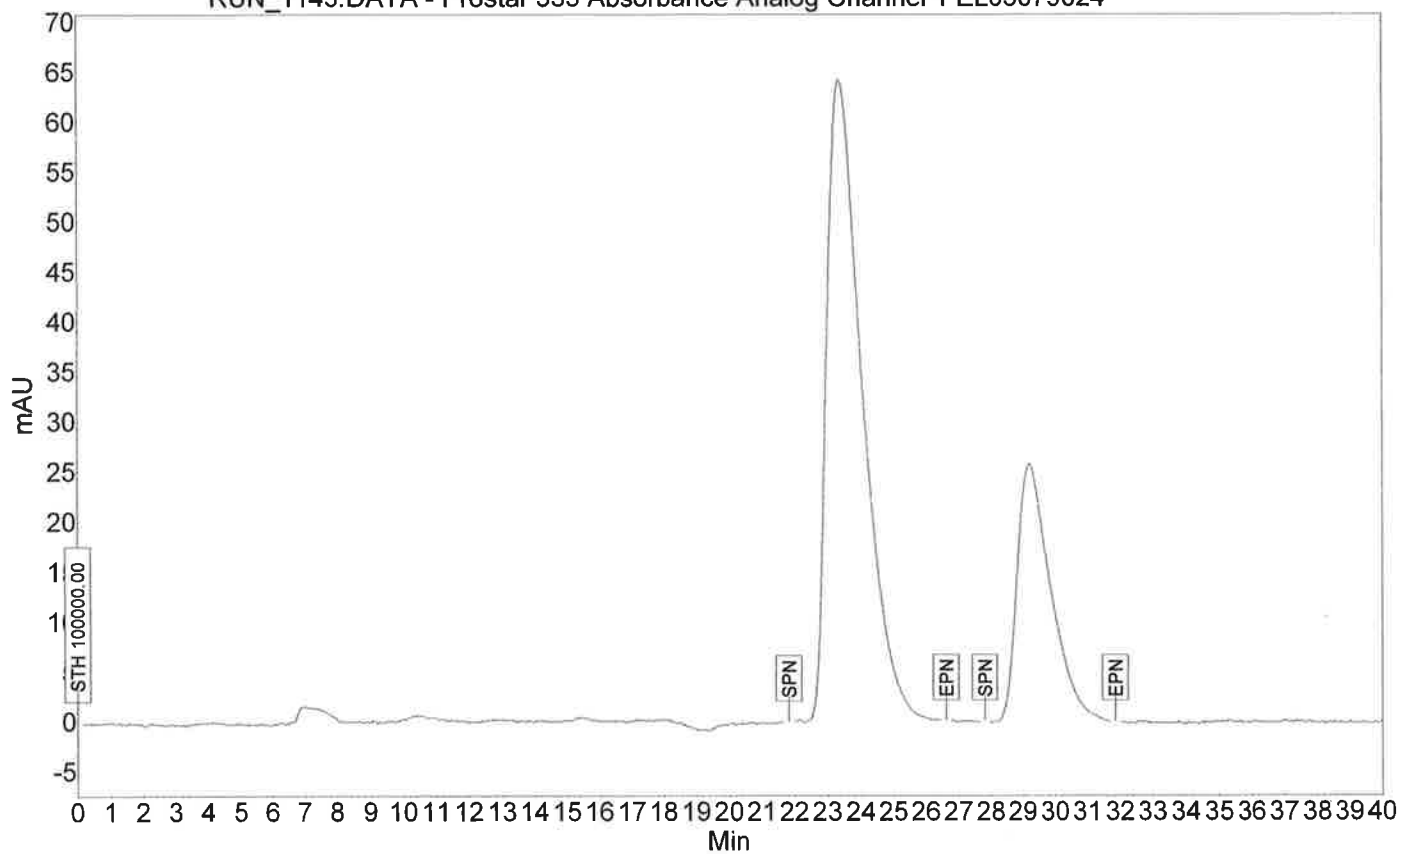

| Index | Name    | Time [Min] | Quantity [% Area] | Height [mAU] | Area [mAU.Min] | Area % [%] |
|-------|---------|------------|-------------------|--------------|----------------|------------|
| 1     | UNKNOWN | 23.36      | 71.91             | 64.2         | 79.6           | 71.906     |
| 2     | UNKNOWN | 29.21      | 28.09             | 25.8         | 31.1           | 28.094     |
| Total |         |            | 100.00            | 90.0         | 110.7          | 100.000    |

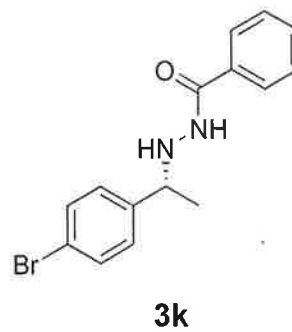

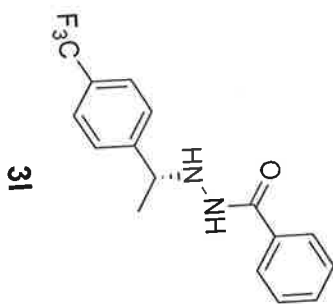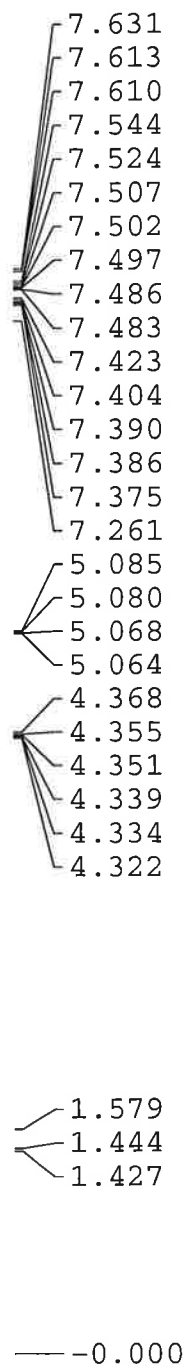

```

NAME Aug16-2021-cxu
EXPNO 30
PROCNO 1
Date_ 20210816
Time 17.18
INSTRUM spect
PROBHD 5 mm PABBO BB-
PULPROG zg30
TD 65536
SOLVENT CDCl3
NS 16
DS 2
SWH 8278.146 Hz
FIDRES 0.126314 Hz
AQ 3.9584243 sec
RG 362
DE 60.400 usec
TE 296.2 K
D1 1.0000000 sec
TD0 1

===== CHANNEL f1 =====
NUC1 1H
P1 11.60 usec
PL1 3.00 dB
SFO1 400.1324710 MHz
SI 32768
SF 400.1300089 MHz
WDW EM
SSB 0
LB 0.30 Hz
GB 0
PC 1.00

```

RUN\_1175.DATA - Prostar 335 Absorbance Analog Channel 1 EL05079024

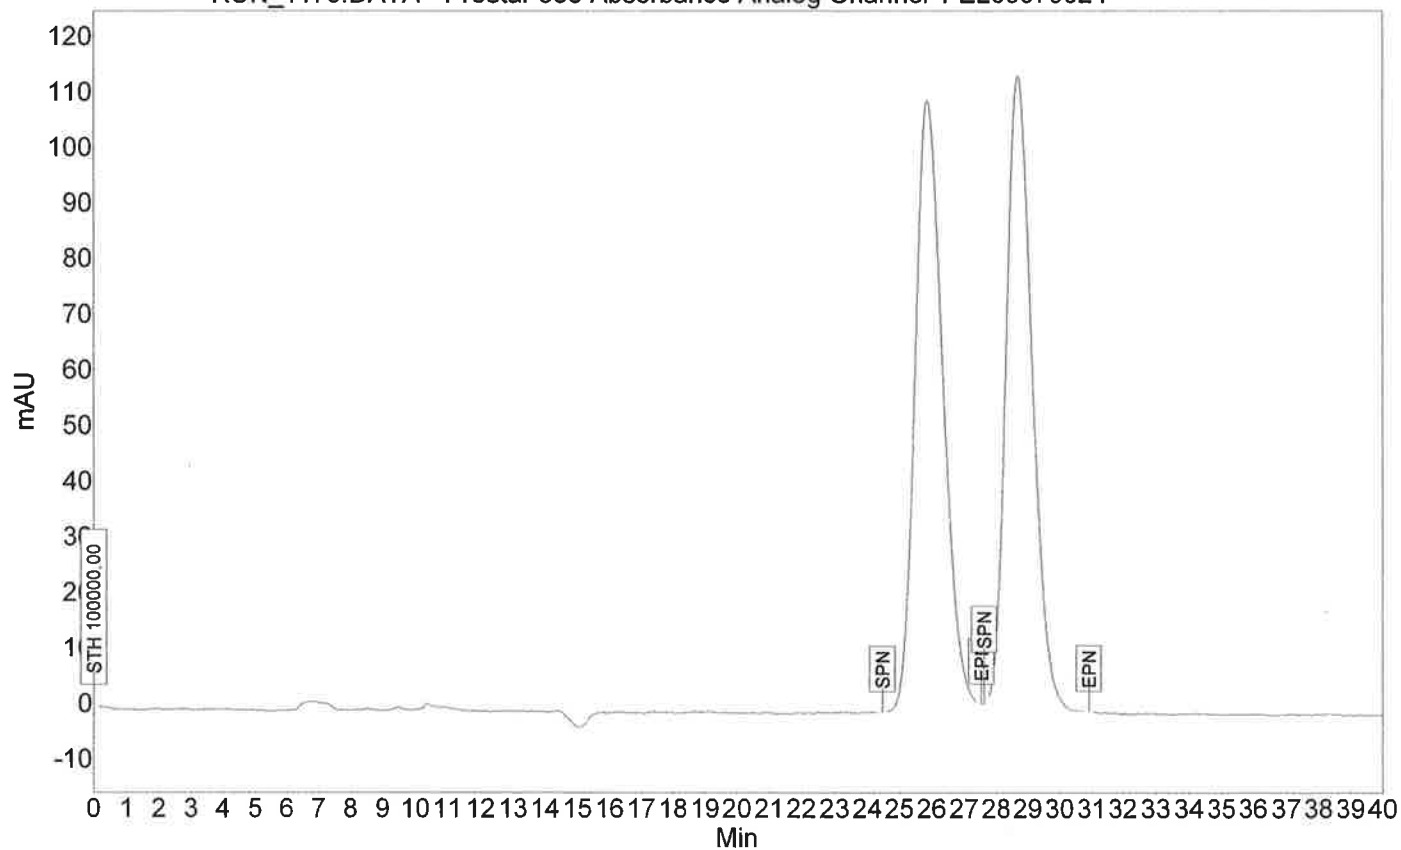

| Index | Name    | Time [Min] | Quantity [% Area] | Height [mAU] | Area [mAU.Min] | Area % [%] |
|-------|---------|------------|-------------------|--------------|----------------|------------|
| 1     | UNKNOWN | 25.87      | 50.00             | 109.4        | 109.0          | 49.996     |
| 2     | UNKNOWN | 28.68      | 50.00             | 113.5        | 109.0          | 50.004     |
| Total |         |            | 100.00            | 222.9        | 218.0          | 100.000    |

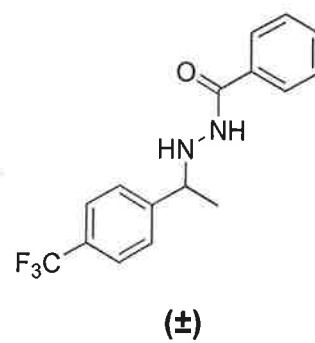

RUN\_1176.DATA - Prostar 335 Absorbance Analog Channel 1 EL05079024

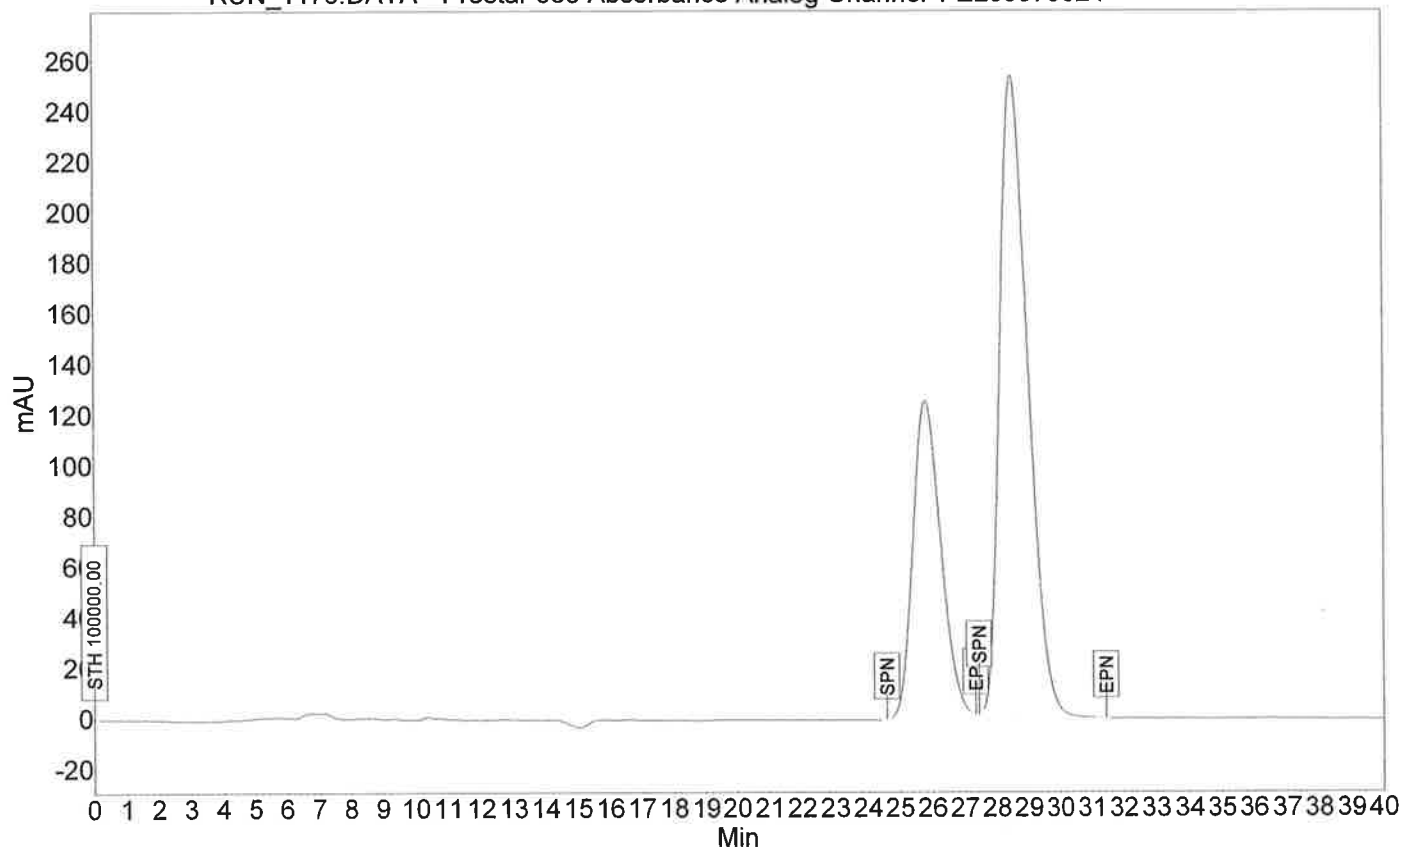

| Index | Name    | Time [Min] | Quantity [% Area] | Height [mAU] | Area [mAU.Min] | Area % [%] |
|-------|---------|------------|-------------------|--------------|----------------|------------|
| 1     | UNKNOWN | 25.77      | 32.27             | 125.3        | 124.2          | 32.271     |
| 2     | UNKNOWN | 28.48      | 67.73             | 253.1        | 260.6          | 67.729     |
| Total |         |            | 100.00            | 378.4        | 384.8          | 100.000    |

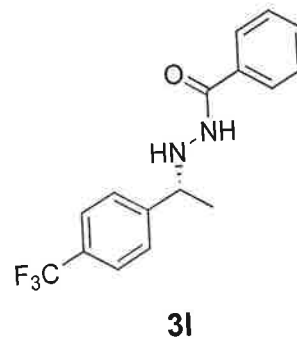

nap

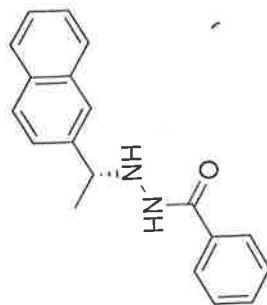

3m

7.849  
7.831  
7.812  
7.605  
7.587  
7.568  
7.564  
7.502  
7.489  
7.485  
7.477  
7.470  
7.465  
7.459  
7.454  
7.441  
7.374  
7.354  
7.336  
7.257  
5.195  
5.182  
4.456  
4.440  
4.423  
4.407  
1.602  
1.522  
1.505  
0.000

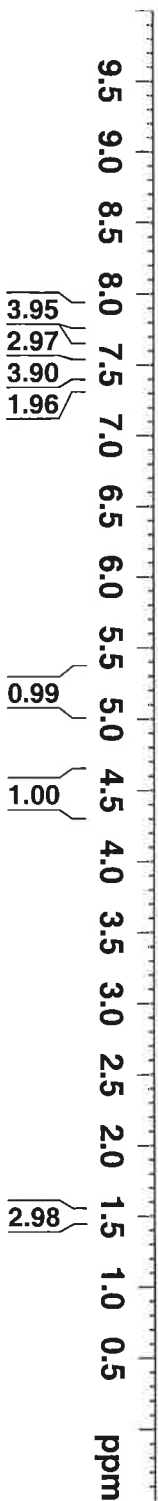

```

NAME Aug15-2021-sys
EXPNO 40
PROCNO 1
Date_ 20210815
Time 16.38
INSTRUM spect
PROBHD 5 mm PABBO BB-
PULPROG zg30
TD 65536
FIDRES 0.126314 Hz
AQ 3.9584243 sec
RG 256
DS 8278.146 Hz
SWH 0.126314 Hz
FIDRES 3.9584243 sec
RG 256
DE 60.400 usec
TE 296.3 K
D1 1.00000000 sec
TD0 1

===== CHANNEL f1 =====
NUC1 1H
P1 11.60 usec
PL1 3.00 dB
SF01 400.1324710 MHz
SI 32768
SF 400.1300108 MHz
WDW EM
SSB 0
LB 0.30 Hz
GB 0
PC 1.00
  
```



RUN\_1171.DATA - Prostar 335 Absorbance Analog Channel 1 EL05079024

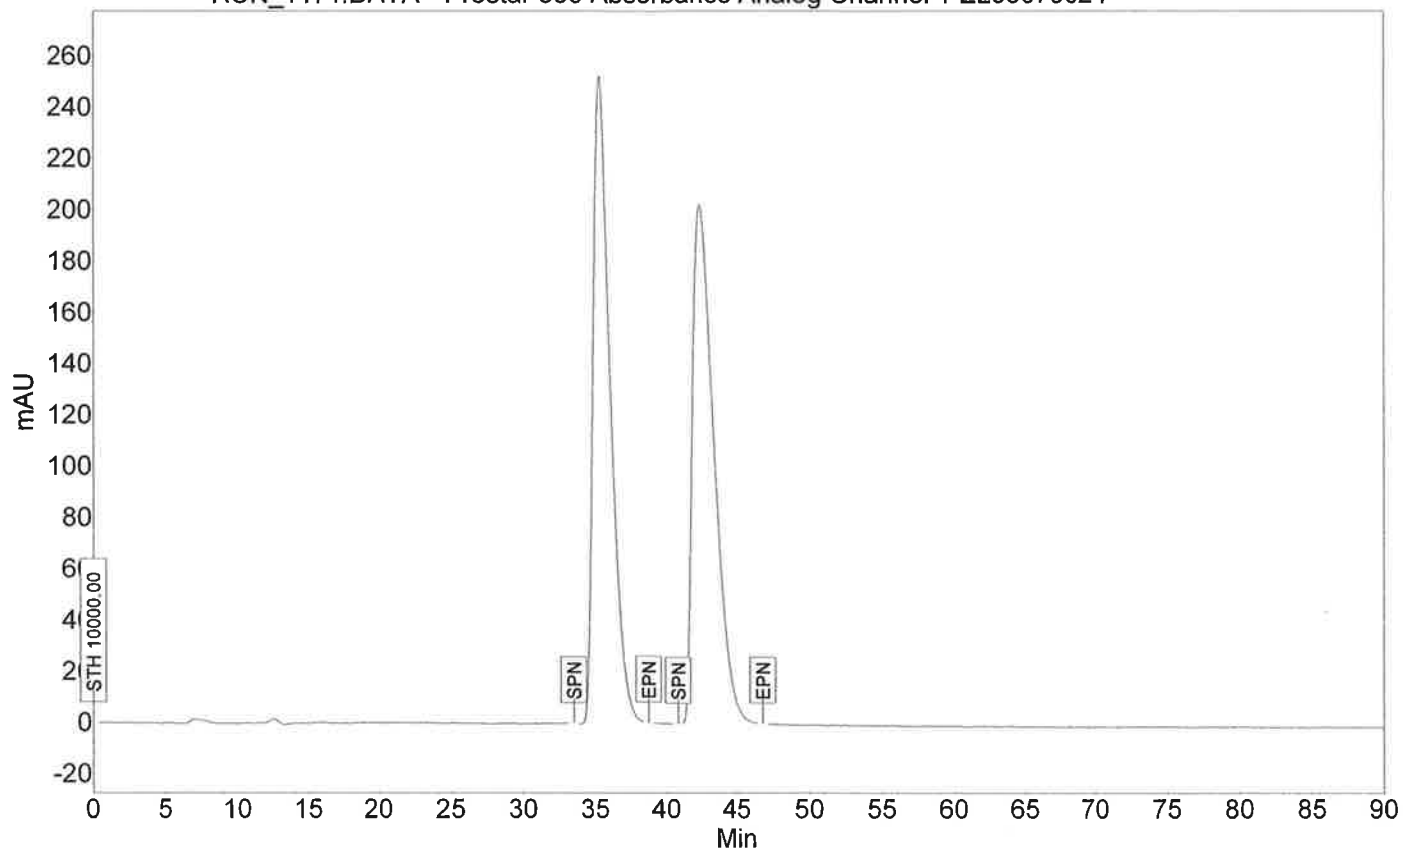

| Index | Name    | Time [Min] | Quantity [% Area] | Height [mAU] | Area [mAU.Min] | Area % [%] |
|-------|---------|------------|-------------------|--------------|----------------|------------|
| 1     | UNKNOWN | 35.23      | 49.53             | 252.4        | 352.2          | 49.530     |
| 2     | UNKNOWN | 42.29      | 50.47             | 202.4        | 358.9          | 50.470     |
| Total |         |            | 100.00            | 454.8        | 711.1          | 100.000    |

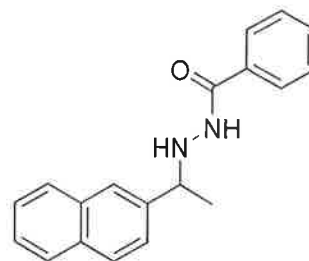

(±)

RUN\_1172.DATA - Prostar 335 Absorbance Analog Channel 1 EL05079024

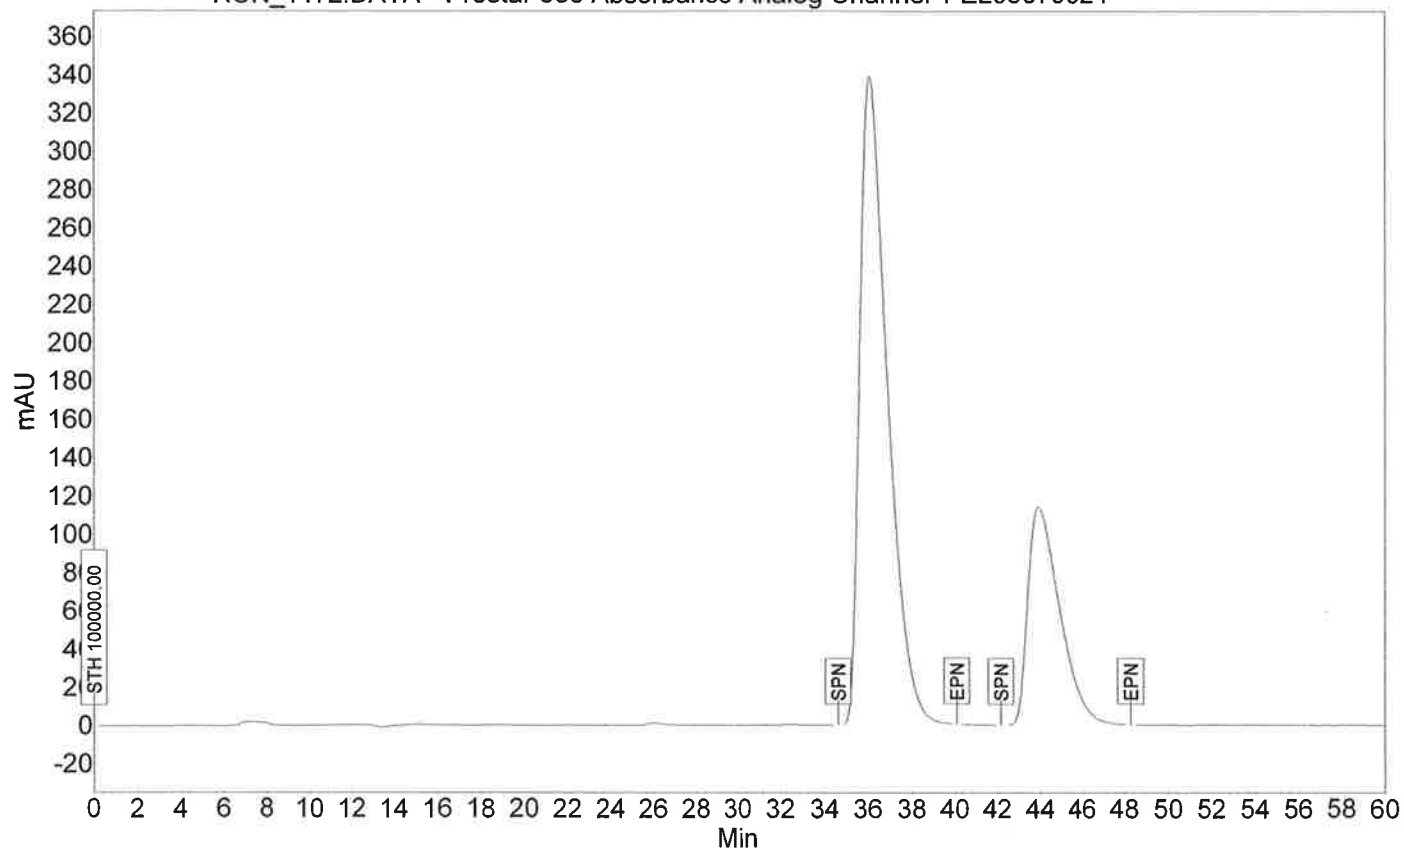

| Index | Name    | Time [Min] | Quantity [% Area] | Height [mAU] | Area [mAU.Min] | Area % [%] |
|-------|---------|------------|-------------------|--------------|----------------|------------|
| 1     | UNKNOWN | 36.05      | 71.55             | 338.6        | 498.8          | 71.547     |
| 2     | UNKNOWN | 43.91      | 28.45             | 114.0        | 198.4          | 28.453     |
| Total |         |            | 100.00            | 452.5        | 697.2          | 100.000    |

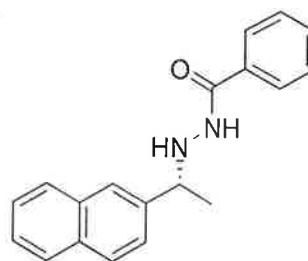

3m

Thio

- 7.681
- 7.663
- 7.530
- 7.512
- 7.494
- 7.441
- 7.422
- 7.403
- 7.274
- 7.263
- 6.987
- 6.974
- 6.966
- 5.148
- 5.136
- 4.603
- 4.592
- 4.588
- 4.576
- 4.561
- 1.588
- 1.538
- 1.521
- 0.000

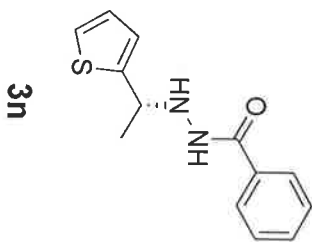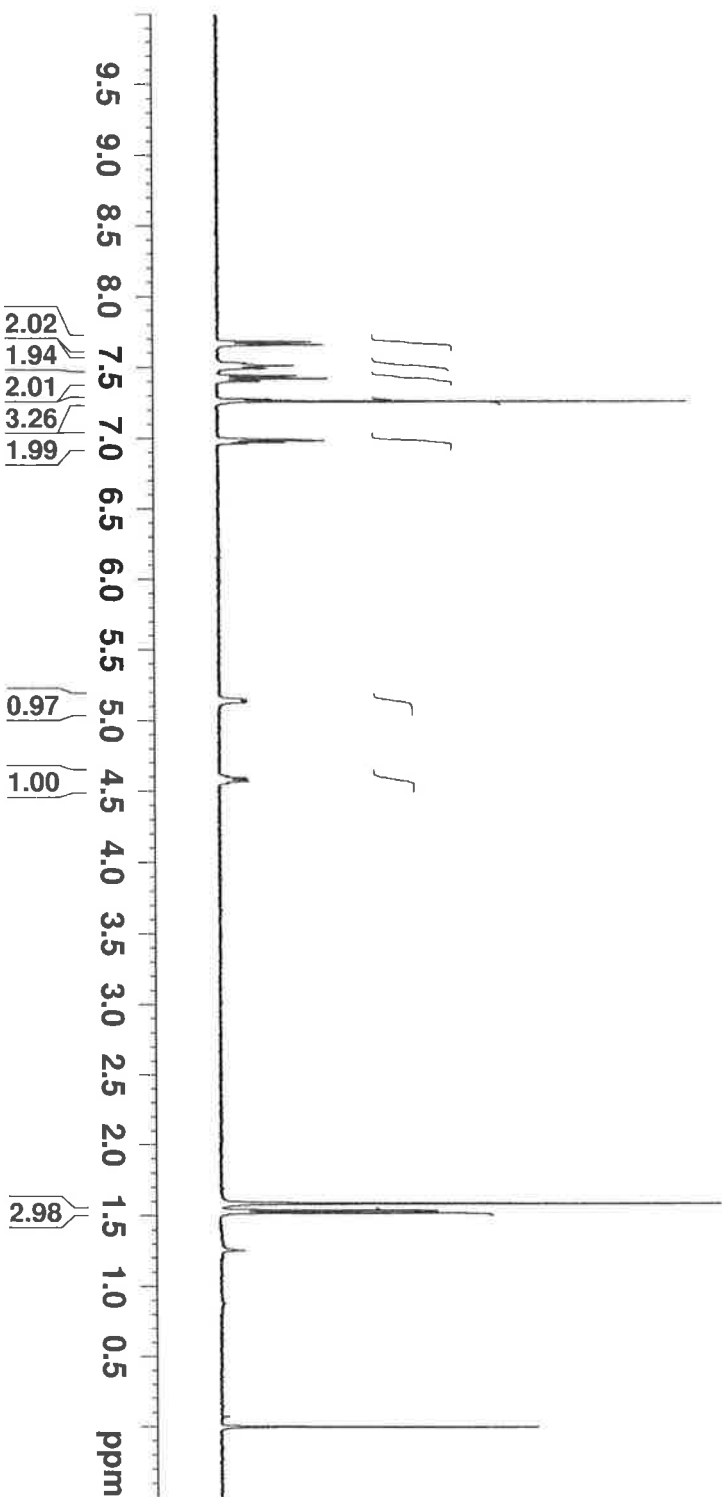

```

NAME                               Aug14-2021-cxu
EXEN0                               6
PROCNO                              1
Date_                               20210814
Time_                               16.13
INSTRUM                             spect
PROBHD                               1H/31
PULPROG                             zg30
TD                                   65536
SOLVENT                             CDCl3
NS                                   16
DS                                   2
SWH                                8276.146 Hz
FIDRES                             0.126314 Hz
AQ                                3.9584243 sec
RG                                29193
DW                                60.400 usec
DE                                6.50 usec
TE                                300.0 K
D1                                1.00000000 sec
TD0                                1

===== CHANNEL f1 =====
NUC1                                1H
P1                                18.75 usec
PL1                                0.50 dB
SFO1                               400.1324710 MHz
SI                                 32768
SF                                400.1300085 MHz
WDW                                EM
SSB                                0
LB                                0.30 Hz
GB                                0
PC                                 1.00
  
```

# RUN\_1152.DATA - Prostar 335 Absorbance Analog Channel 1 EL05079024

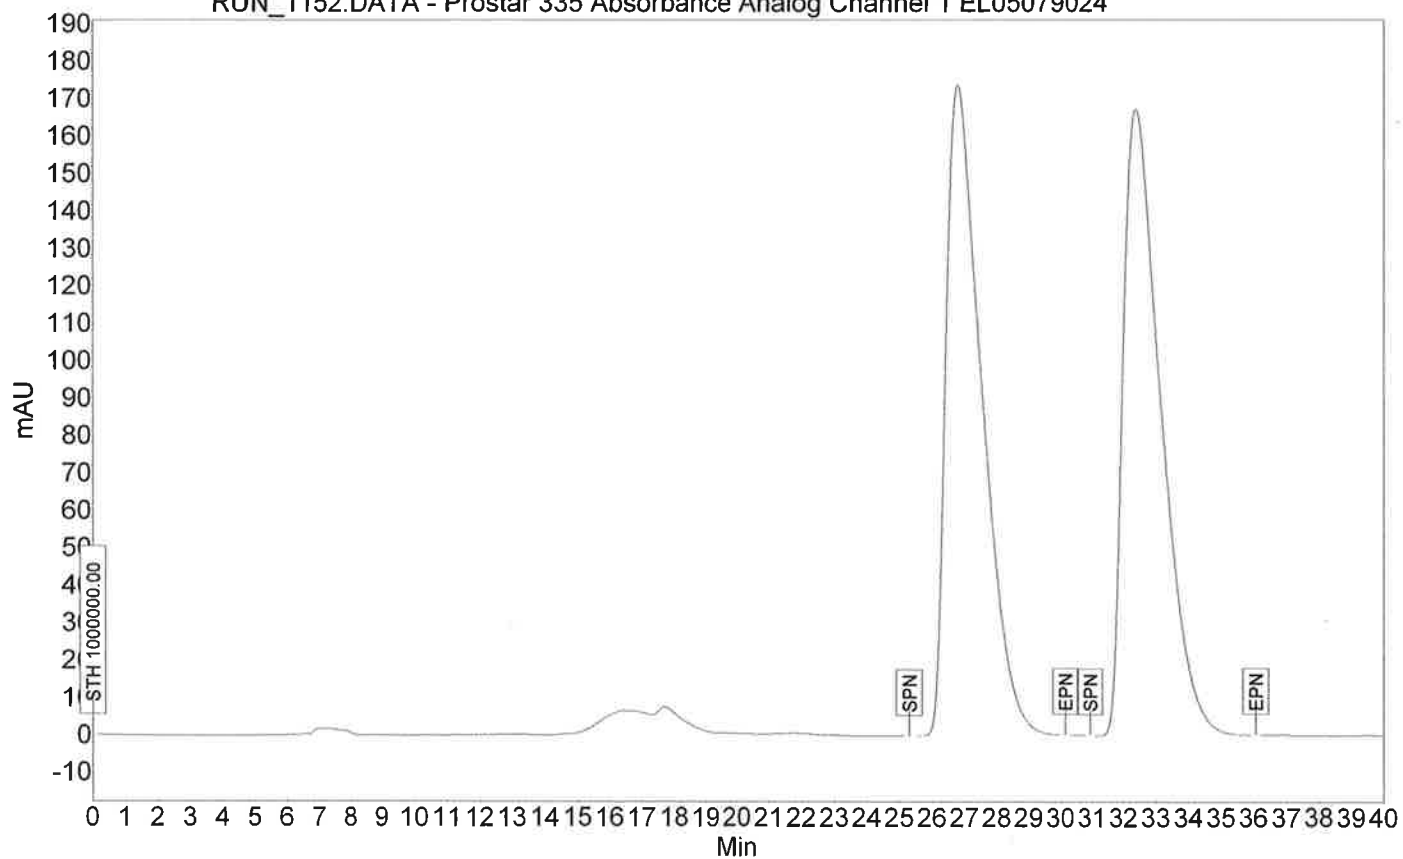

| Index | Name    | Time [Min] | Quantity [% Area] | Height [mAU] | Area [mAU.Min] | Area % [%] |
|-------|---------|------------|-------------------|--------------|----------------|------------|
| 1     | UNKNOWN | 26.77      | 49.94             | 173.7        | 224.1          | 49.941     |
| 2     | UNKNOWN | 32.36      | 50.06             | 167.0        | 224.6          | 50.059     |
| Total |         |            | 100.00            | 340.7        | 448.6          | 100.000    |

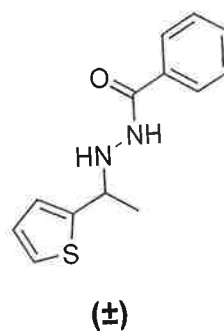

RUN\_1153.DATA - Prostar 335 Absorbance Analog Channel 1 EL05079024

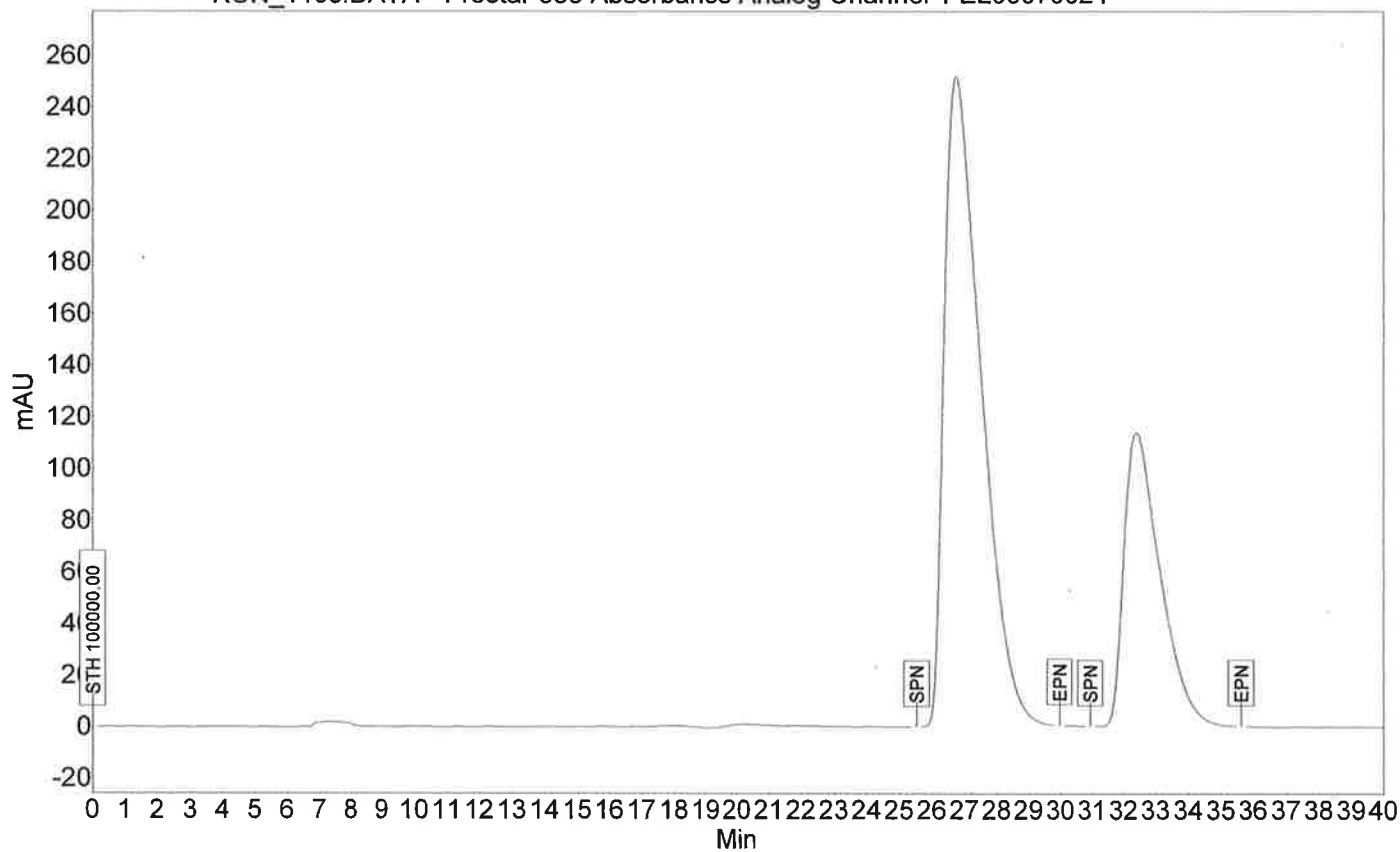

| Index | Name    | Time [Min] | Quantity [% Area] | Height [mAU] | Area [mAU.Min] | Area % [%] |
|-------|---------|------------|-------------------|--------------|----------------|------------|
| 1     | UNKNOWN | 26.72      | 69.16             | 251.6        | 333.2          | 69.159     |
| 2     | UNKNOWN | 32.39      | 30.84             | 113.8        | 148.6          | 30.841     |
|       |         |            |                   |              |                |            |
| Total |         |            | 100.00            | 365.4        | 481.7          | 100.000    |

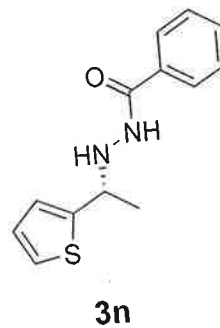

Et

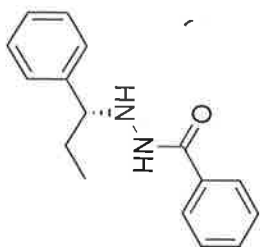

30

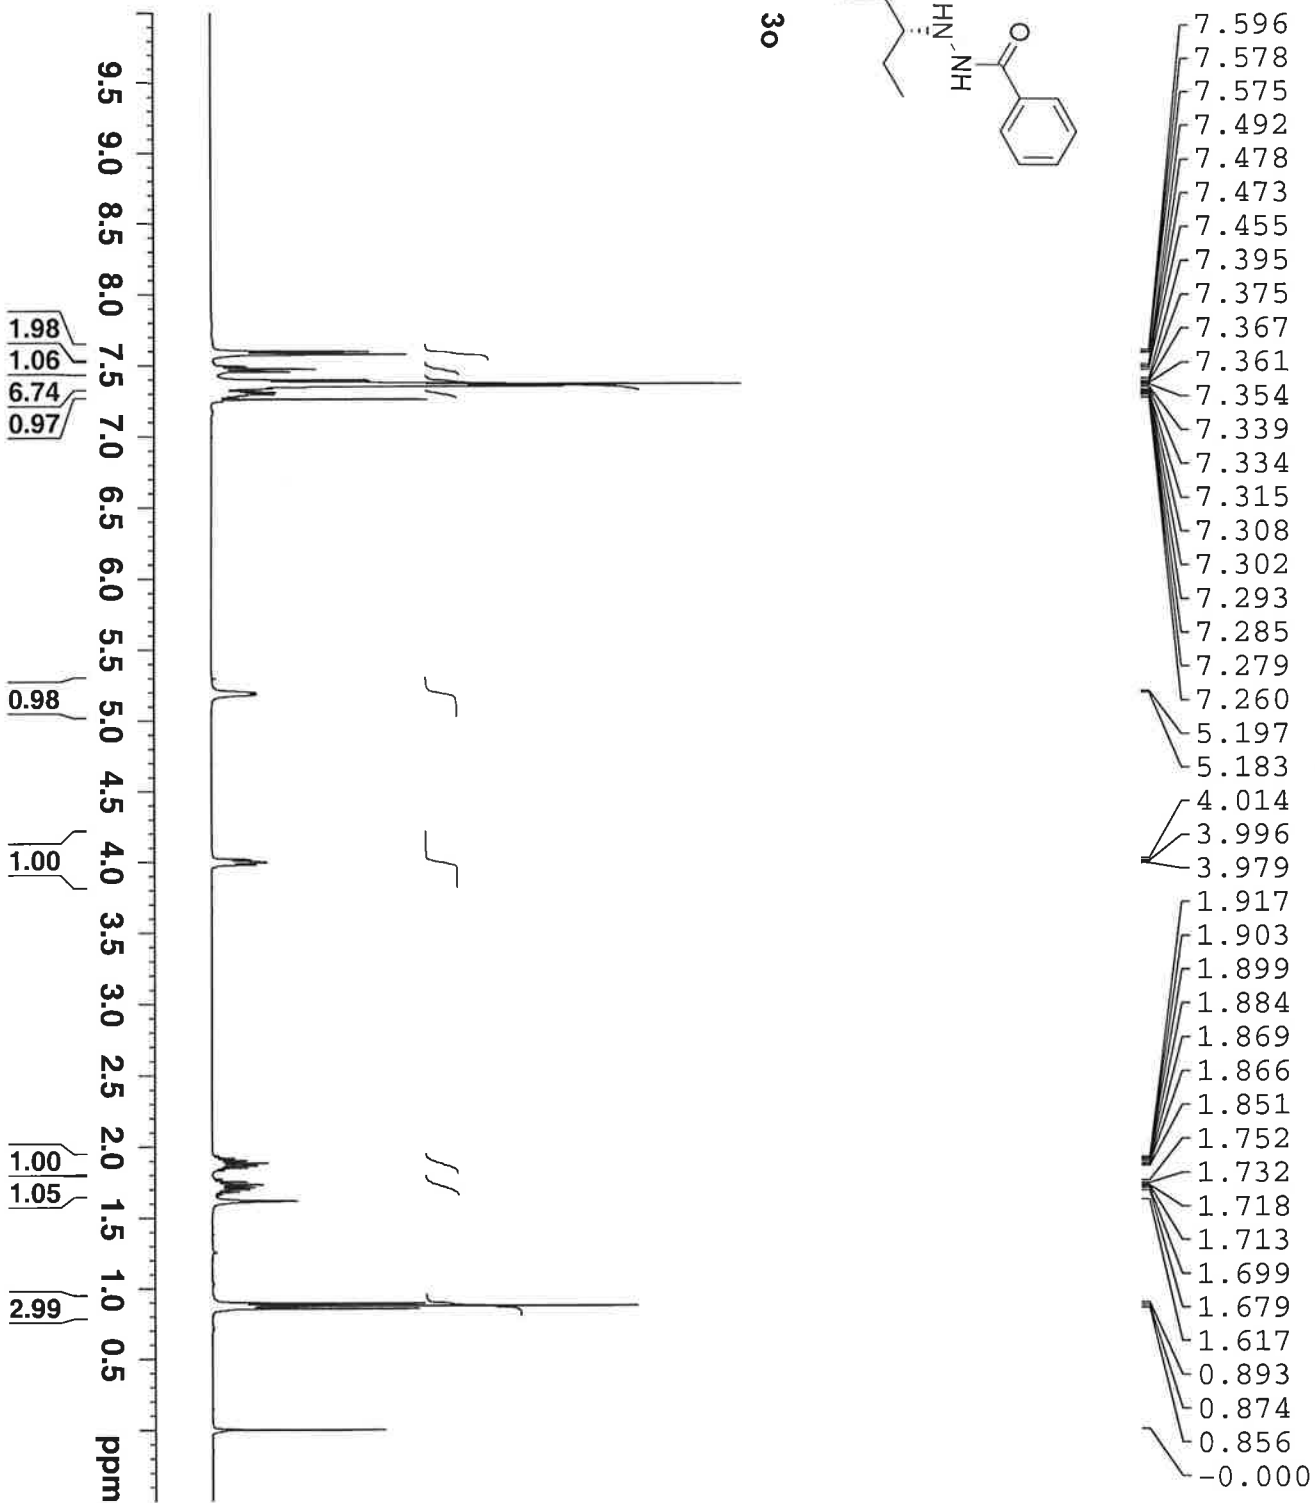

```

NAME                               Aug19-2021-sys
EXPNO                               20
PROCNO                              1
Date_                               20210819
Time_                               15.56
INSTRUM                             spect
PROBHD                             5 mm PABBO BB-
PULPROG                             zg30
TD                                 65536
SOLVENT                             CDCl3
NS                                  16
DS                                  2
SWH                                8278.146 Hz
FIDRES                             0.126314 Hz
AQ                                 3.9584243 sec
RG                                  256
DW                                60.400 usec
DE                                 6.50 usec
TE                                 296.6 K
D1                                 1.00000000 sec
TD0                                 1

===== CHANNEL f1 =====
NUC1                                1H
P1                                 11.60 usec
PL1                                 3.00 dB
SFO1                              400.1324710 MHz
SI                                 32768
SF                                 400.1300097 MHz
WDW                                 EM
SSB                                 0
LB                                 0.30 Hz
GB                                 0
PC                                 1.00
  
```

RUN\_1158.DATA - Prostar 335 Absorbance Analog Channel 1 EL05079024

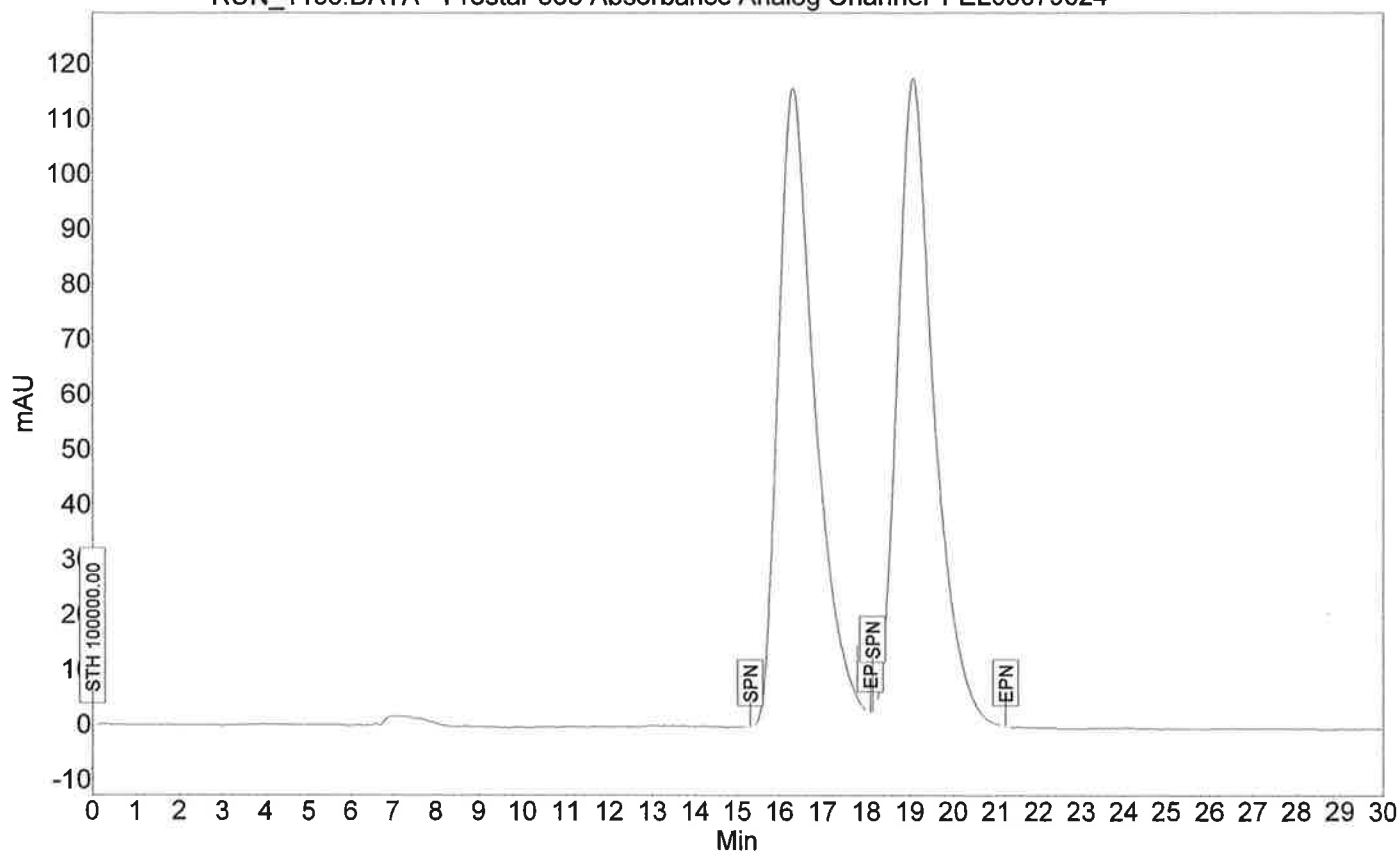

| Index | Name    | Time [Min] | Quantity [% Area] | Height [mAU] | Area [mAU.Min] | Area % [%] |
|-------|---------|------------|-------------------|--------------|----------------|------------|
| 1     | UNKNOWN | 16.31      | 50.19             | 115.0        | 112.6          | 50.194     |
| 2     | UNKNOWN | 19.08      | 49.81             | 115.9        | 111.8          | 49.806     |
| Total |         |            | 100.00            | 230.9        | 224.4          | 100.000    |

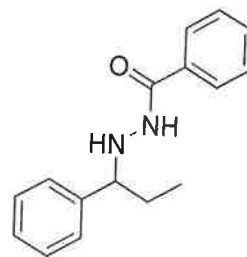

(±)

RUN\_1207.DATA - Prostar 335 Absorbance Analog Channel 1 EL05079024

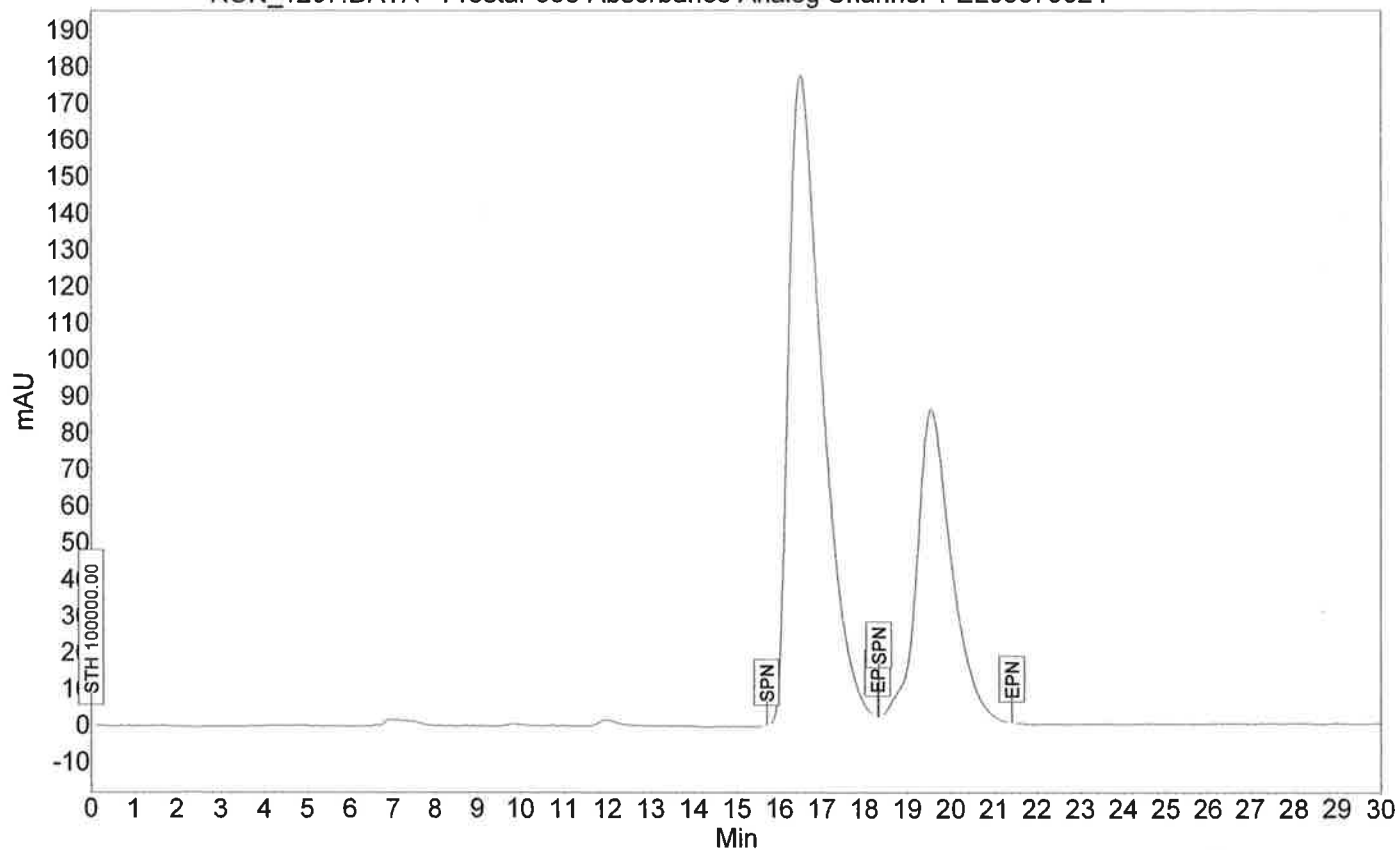

| Index | Name    | Time [Min] | Quantity [% Area] | Height [mAU] | Area [mAU.Min] | Area % [%] |
|-------|---------|------------|-------------------|--------------|----------------|------------|
| 1     | UNKNOWN | 16.49      | 67.80             | 176.9        | 163.0          | 67.802     |
| 2     | UNKNOWN | 19.55      | 32.20             | 84.6         | 77.4           | 32.198     |
| Total |         |            | 100.00            | 261.5        | 240.4          | 100.000    |

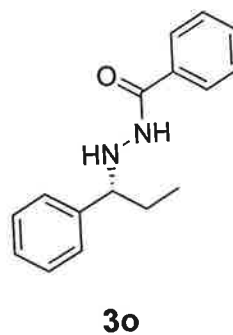



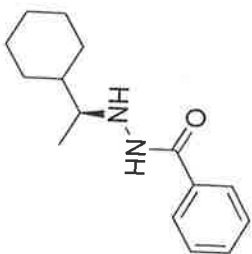

3p

7.758  
7.741  
7.737  
7.544  
7.541  
7.526  
7.507  
7.469  
7.450  
7.432  
7.263

4.885  
2.940  
2.924  
2.909  
2.895  
2.879  
1.775  
1.701  
1.671  
1.469  
1.448  
1.440  
1.433  
1.428  
1.411  
1.399  
1.312  
1.289  
1.258  
1.250  
1.227  
1.198

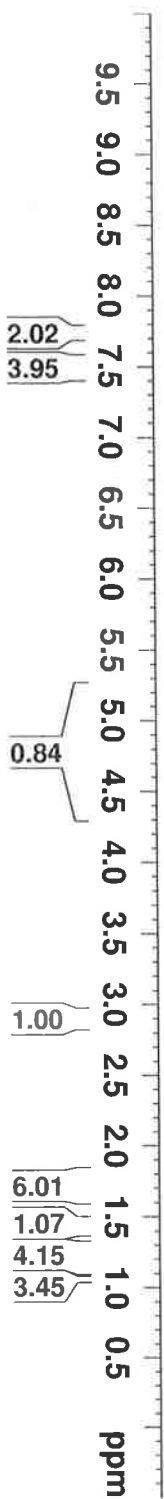

```

NAME      Aug05-2021-cxu
EXPNO     2
PROCNO    1
Date_     20210805
Time      15.46
INSTRUM   spect
PROBHD    5 mm TBI 1H/31
PULPROG   zg30
TD         65536
SOLVENT   CDCl3
NS         16
DS         2
SWH        8278.146 Hz
FIDRES     0.126314 Hz
AQ         3.9584243 sec
RG         16384
DW         60.400 usec
DE         6.50 usec
TE         300.0 K
D1         1.00000000 sec
TD0        1

===== CHANNEL f1 =====
NUC1       1H
P1         18.75 usec
PL1        0.50 dB
SFO1       400.1324710 MHz
SI         32768
SF         400.1300083 MHz
WDW        EM
SSB        0
LB         0.30 Hz
GB         0
PC         1.00
  
```

RUN\_1135.DATA - Prostar 335 Absorbance Analog Channel 1 EL05079024

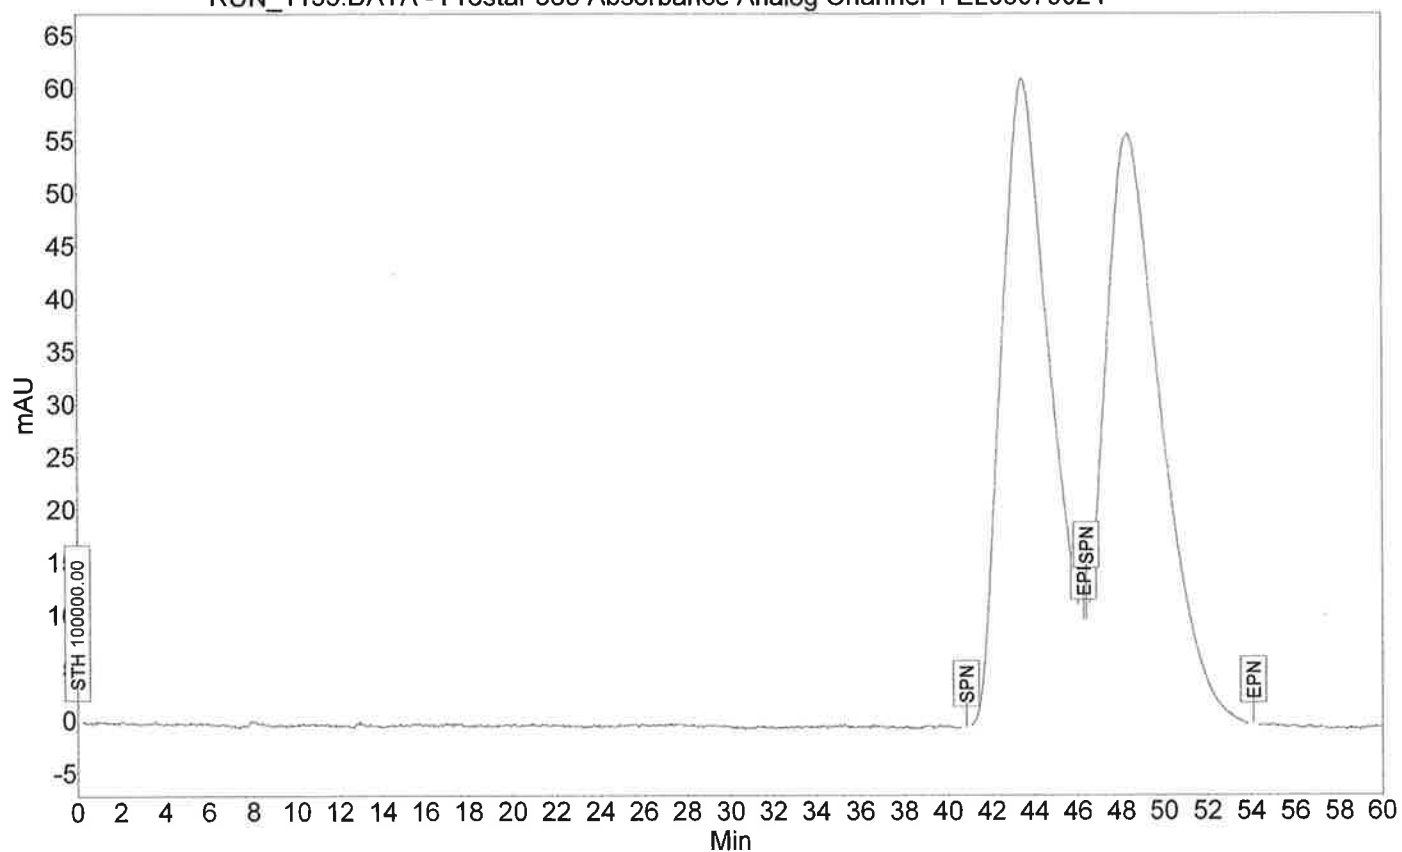

| Index | Name    | Time [Min] | Quantity [% Area] | Height [mAU] | Area [mAU.Min] | Area % [%] |
|-------|---------|------------|-------------------|--------------|----------------|------------|
| 1     | UNKNOWN | 43.41      | 50.49             | 56.8         | 135.1          | 50.486     |
| 2     | UNKNOWN | 48.35      | 49.51             | 48.6         | 132.5          | 49.514     |
| Total |         |            | 100.00            | 105.4        | 267.7          | 100.000    |

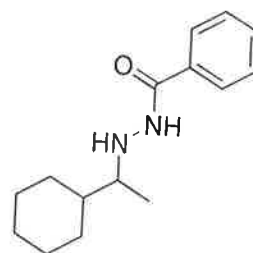

(±)

RUN\_1203.DATA - Prostar 335 Absorbance Analog Channel 1 EL05079024

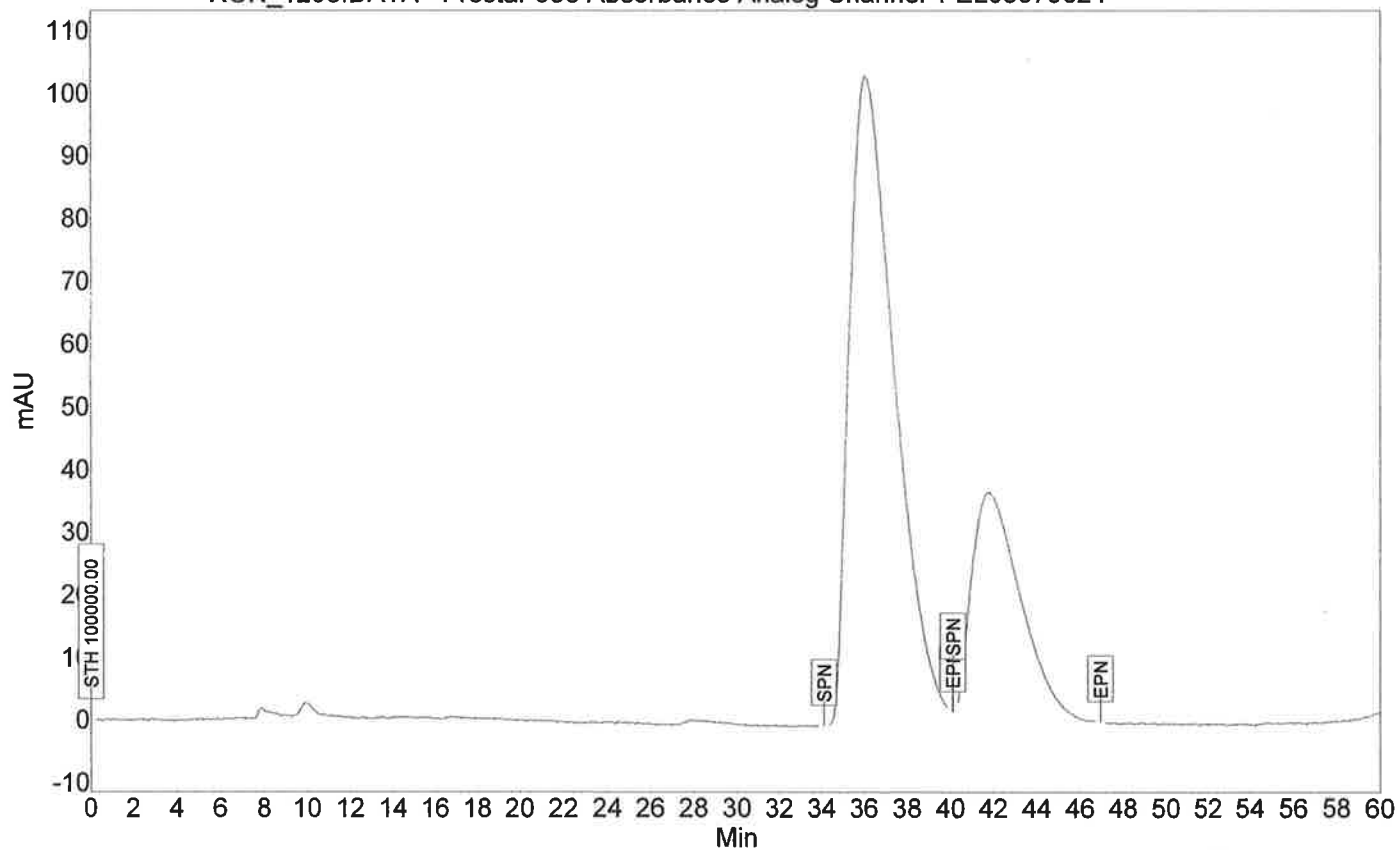

| Index | Name    | Time [Min] | Quantity [% Area] | Height [mAU] | Area [mAU.Min] | Area % [%] |
|-------|---------|------------|-------------------|--------------|----------------|------------|
| 1     | UNKNOWN | 36.08      | 72.91             | 103.0        | 248.6          | 72.907     |
| 2     | UNKNOWN | 41.83      | 27.09             | 35.5         | 92.4           | 27.093     |
|       |         |            |                   |              |                |            |
| Total |         |            | 100.00            | 138.5        | 341.0          | 100.000    |

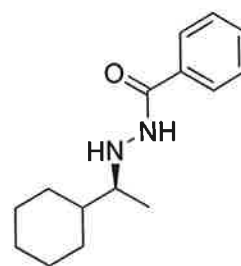

3p

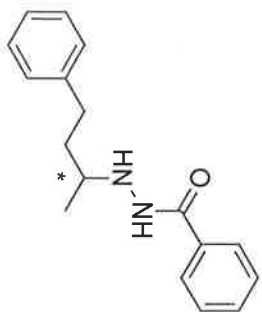

3q

7.740  
7.722  
7.718  
7.545  
7.526  
7.508  
7.465  
7.445  
7.427  
7.306  
7.288  
7.269  
7.260  
7.227  
7.208  
7.187  
7.169

4.912  
3.170  
3.154  
3.138  
3.123  
2.801  
2.786  
2.767  
2.752  
2.741  
2.727  
2.713  
2.703  
2.688  
2.679  
2.669  
2.654  
1.938  
1.924  
1.909  
1.904  
1.898  
1.889  
1.883  
1.878  
1.864  
1.849  
1.730  
1.713  
1.704  
1.696  
1.688  
1.679  
1.671  
1.663  
1.653  
1.637

```

NAME      Aug05-2021-cxu
EXPNO     1
PROCNO    1
Date_     20210805
Time      15.38
INSTRUM   spect
PROBHD    5 mm TBI 1H/31
PULPROG   zg30
TD         65536
SOLVENT   CDCl3
NS         16
DS         2
SWH        8278.146 Hz
FIDRES     0.126314 Hz
AQ         3.9584243 sec
RG         16384
DW         60.400 usec
DE         6.50 usec
TE         300.0 K
D1         1.00000000 sec
TD0        1

===== CHANNEL f1 =====
NUC1       1H
P1         18.75 usec
PL1        0.50 dB
SFO1       400.1324710 MHz
SI         32768
SF         400.1300093 MHz
WDW        EM
SSB        0
LB         0.30 Hz
GB         0
PC         1.00

```

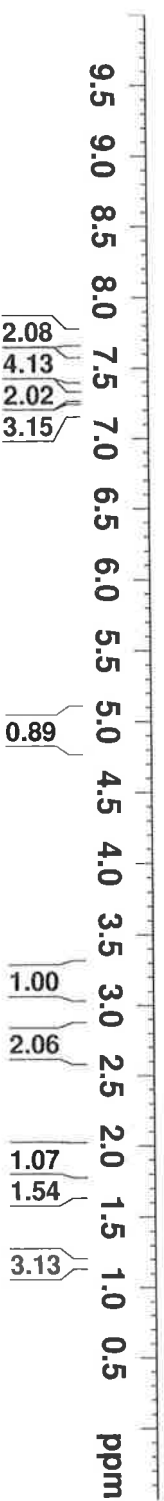

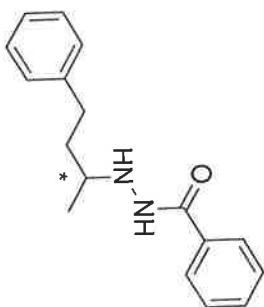

3q

— 167.45

142.14  
132.94  
131.80  
128.68  
128.40  
128.33  
126.83  
125.83

77.32  
77.00  
76.68

— 55.62

36.73  
32.13

— 18.62

200 180 160 140 120 100 80 60 40 20 0 ppm

```

NAME                               Aug09-2021-cxu
EXPNO                               10
PROCNO                              1
Date_                               20210810
Time_                               6.29
INSTRUM                             spect
PROBHD                               5 mm PABBO BB-
PULPROG                             zgpg30
TD                                   65536
SOLVENT                             CDCl3
NS                                   10240
DS                                   4
SWH                                  23980.814 Hz
FIDRES                              0.365918 Hz
AQ                                  1.3664756 sec
RG                                   32768
DE                                   20.850 usec
TE                                   301.9 K
D1                                   2.00000000 sec
D11                                  0.03000000 sec
TD0                                  1

===== CHANNEL f1 =====
NUC1                                 13C
P1                                  14.75 usec
PL1                                 0.00 dB
SFO1                               100.6228298 MHz

===== CHANNEL f2 =====
CPDPRG2                             waltz16
NUC2                                 1H
PCPD2                                80.00 usec
PL2                                 -2.00 dB
PL12                               12.54 dB
PL13                               15.00 dB
SFO2                               400.1316005 MHz
SI                                   32768
SF                                  100.6127704 MHz
WDW                                  EM
SSB                                  0
LB                                  1.00 Hz
GB                                  0
PC                                  1.40
  
```

RUN\_1131.DATA - Prostar 335 Absorbance Analog Channel 1 EL05079024

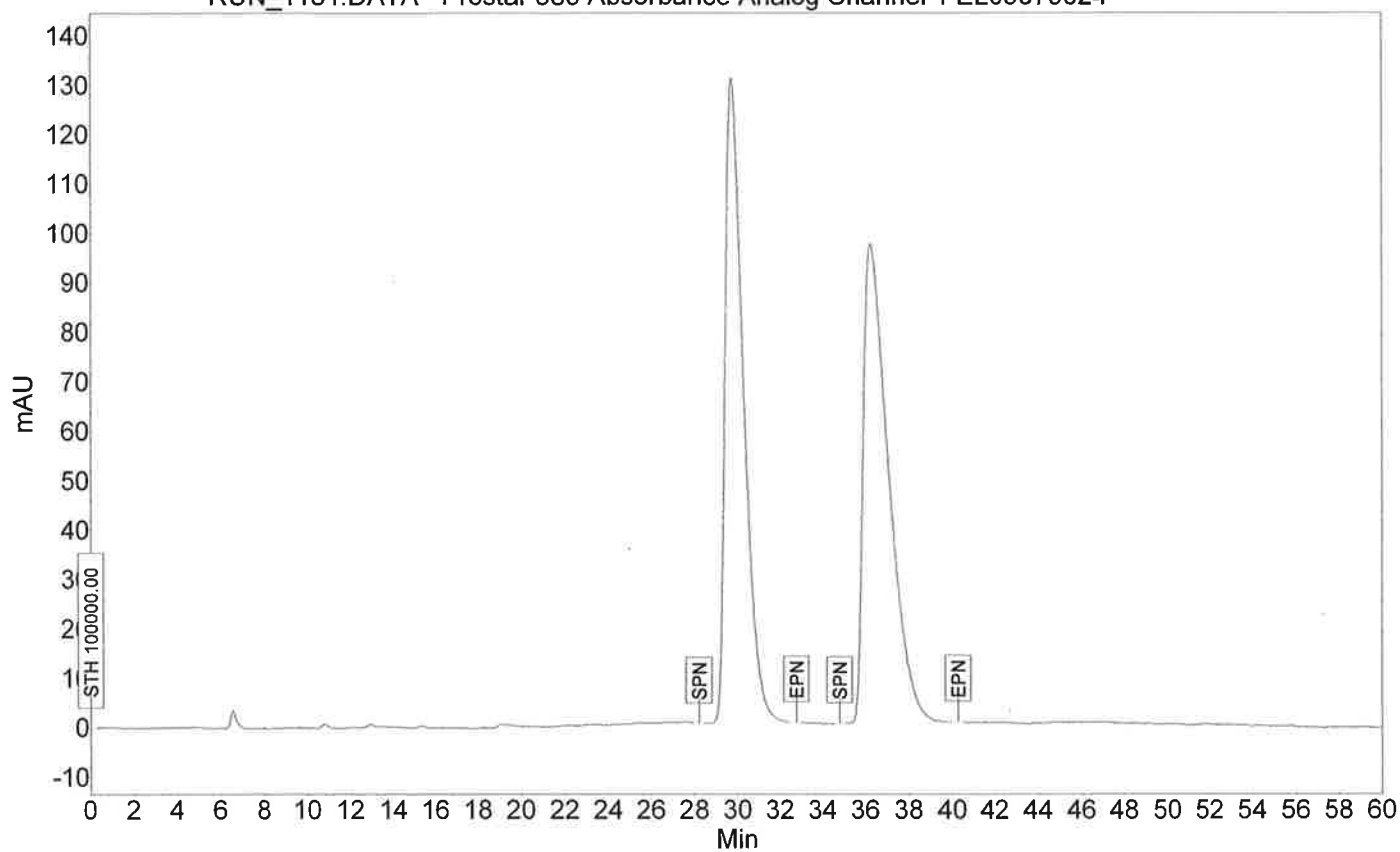

| Index | Name    | Time [Min] | Quantity [% Area] | Height [mAU] | Area [mAU.Min] | Area % [%] |
|-------|---------|------------|-------------------|--------------|----------------|------------|
| 1     | UNKNOWN | 29.72      | 49.68             | 130.5        | 128.8          | 49.681     |
| 2     | UNKNOWN | 36.25      | 50.32             | 97.0         | 130.5          | 50.319     |
| Total |         |            | 100.00            | 227.6        | 259.3          | 100.000    |

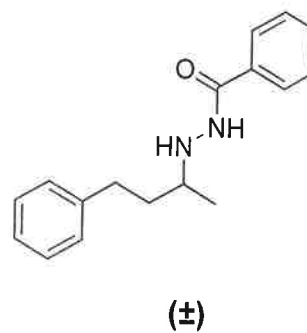

RUN\_1133.DATA - Prostar 335 Absorbance Analog Channel 1 EL05079024

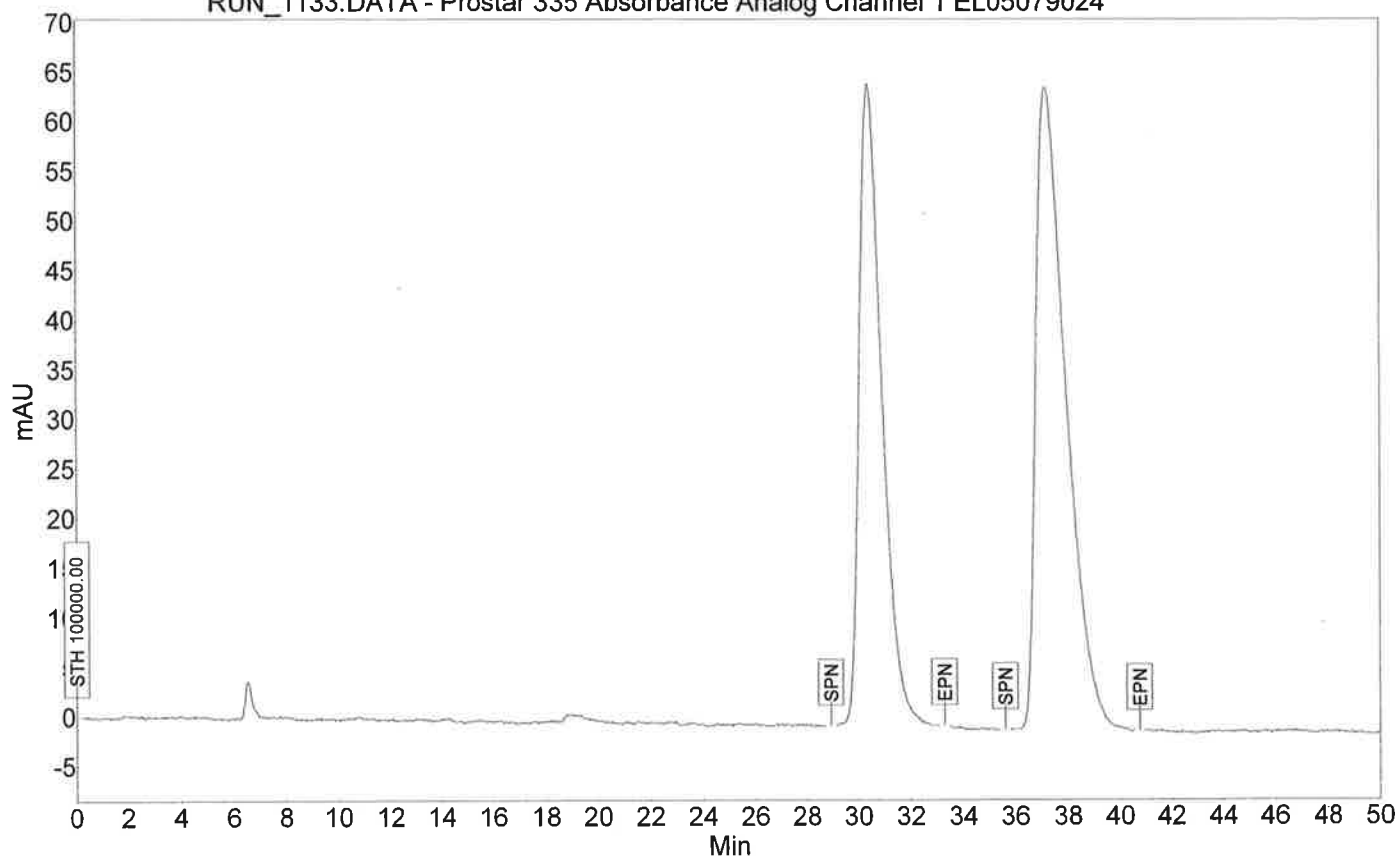

| Index | Name    | Time [Min] | Quantity [% Area] | Height [mAU] | Area [mAU.Min] | Area % [%] |
|-------|---------|------------|-------------------|--------------|----------------|------------|
| 1     | UNKNOWN | 30.40      | 42.98             | 64.8         | 64.8           | 42.983     |
| 2     | UNKNOWN | 37.17      | 57.02             | 64.9         | 85.9           | 57.017     |
| Total |         |            | 100.00            | 129.7        | 150.7          | 100.000    |

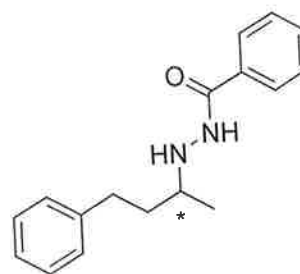

3q

RUN\_1188.DATA - Prostar 335 Absorbance Analog Channel 2 EL05079024

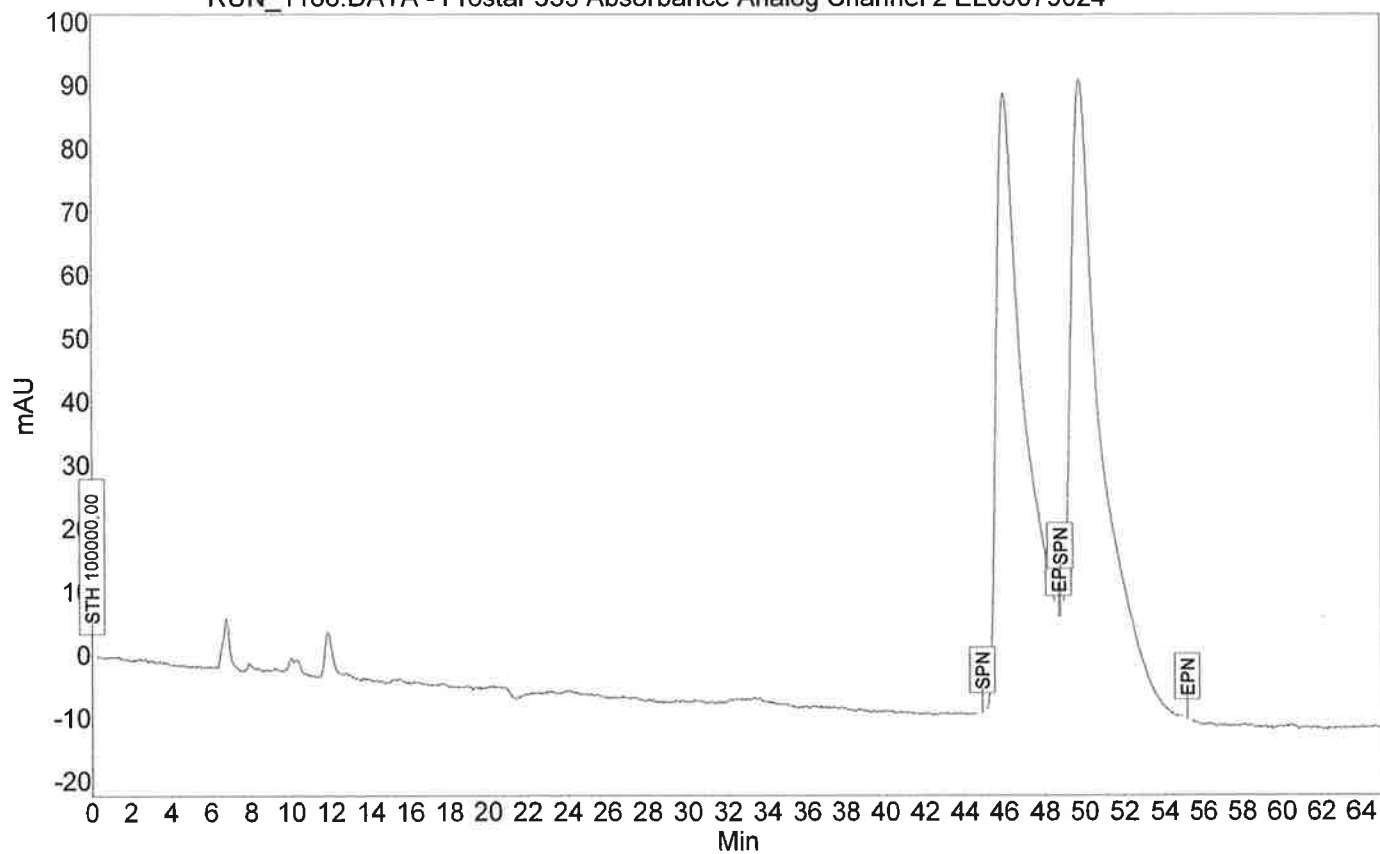

| Index | Name    | Time [Min] | Quantity [% Area] | Height [mAU] | Area [mAU.Min] | Area % [%] |
|-------|---------|------------|-------------------|--------------|----------------|------------|
| 1     | UNKNOWN | 45.99      | 49.70             | 93.6         | 135.3          | 49.697     |
| 2     | UNKNOWN | 49.79      | 50.30             | 87.6         | 136.9          | 50.303     |
| Total |         |            | 100.00            | 181.2        | 272.2          | 100.000    |

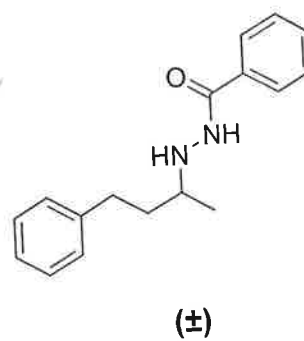



RUN\_1189.DATA - Prostar 335 Absorbance Analog Channel 2 EL05079024

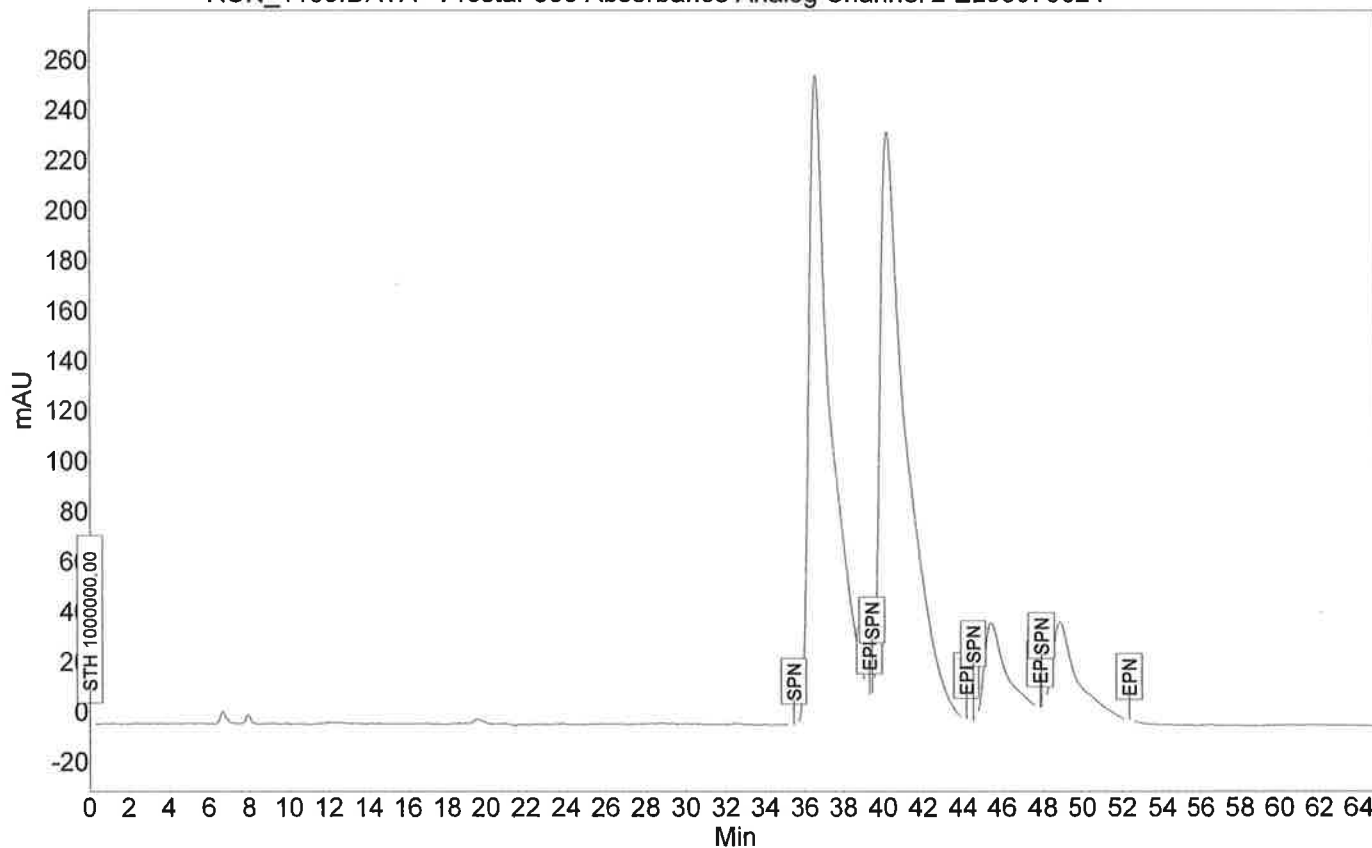

| Index | Name    | Time [Min] | Quantity [% Area] | Height [mAU] | Area [mAU.Min] | Area % [%] |
|-------|---------|------------|-------------------|--------------|----------------|------------|
| 1     | UNKNOWN | 36.56      | 43.45             | 255.5        | 332.7          | 43.446     |
| 2     | UNKNOWN | 40.21      | 44.01             | 226.0        | 337.1          | 44.014     |
| 3     | UNKNOWN | 45.41      | 6.12              | 37.6         | 46.8           | 6.115      |
| 4     | UNKNOWN | 48.85      | 6.43              | 35.1         | 49.2           | 6.426      |
| Total |         |            | 100.00            | 554.3        | 765.8          | 100.000    |

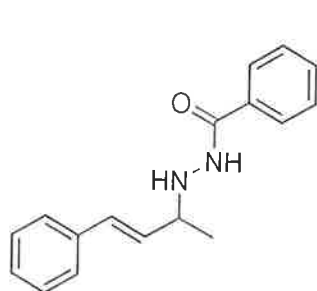

(±)

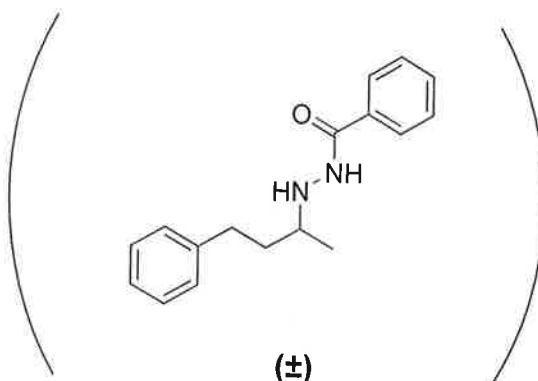

(±)

RUN\_1184.DATA - Prostar 335 Absorbance Analog Channel 2 EL05079024

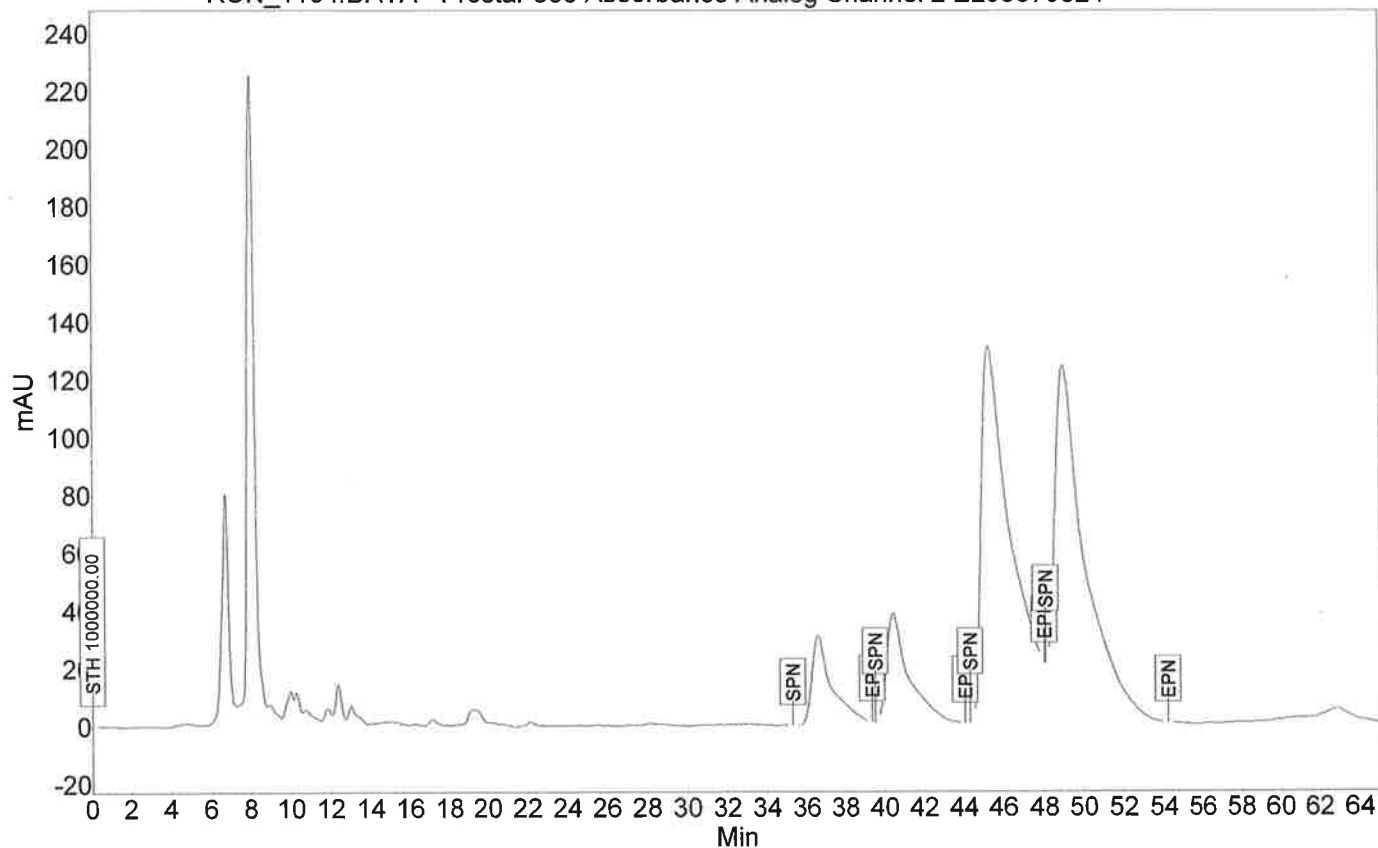

| Index | Name    | Time [Min] | Quantity [% Area] | Height [mAU] | Area [mAU.Min] | Area % [%] |
|-------|---------|------------|-------------------|--------------|----------------|------------|
| 1     | UNKNOWN | 36.56      | 8.30              | 30.7         | 36.0           | 8.301      |
| 2     | UNKNOWN | 40.47      | 11.28             | 37.9         | 48.9           | 11.282     |
| 3     | UNKNOWN | 45.25      | 43.01             | 125.4        | 186.3          | 43.008     |
| 4     | UNKNOWN | 48.99      | 37.41             | 106.8        | 162.1          | 37.409     |
|       |         |            |                   |              |                |            |
| Total |         |            | 100.00            | 300.7        | 433.2          | 100.000    |

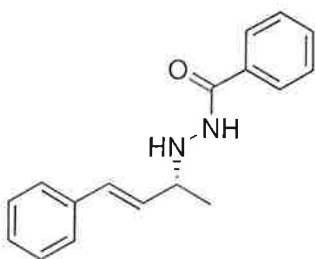

3r

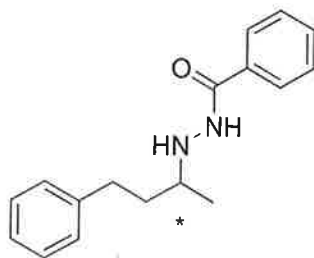

3q
